# Supplementary material for: Direct N9-arylation of purines with aryl halides
Source: Royal Society of Chemistry journal article supplement (doi:10.1039/c3cc48642g), 2014-01-01

## Supporting Information

# Direct $N^9$ -arylation of purines with aryl halides

Anders Foller Larsen and Trond Ulven\*

*Department of Physics and Chemistry, University of Southern Denmark, Campusvej 55, DK-5230 Odense M, Denmark.*

*E-mail: ulven@sdu.dk*

### Table of Contents

|                                                                              |     |
|------------------------------------------------------------------------------|-----|
| General Methods .....                                                        | S2  |
| Synthesis of phenanthroline ligands .....                                    | S2  |
| Table S1: Ligand screening for the coupling of adenine and iodobenzene ..... | S3  |
| Reaction optimisation .....                                                  | S4  |
| General procedure for $N^9$ -arylation of adenine (Table 2) .....            | S4  |
| Synthetic procedure for $N$ -arylation of various purines (Table 3) .....    | S11 |
| References .....                                                             | S14 |
| NMR-spectra .....                                                            | S15 |

## General Methods

All commercial solvents and reagents were used as obtained without further purification, except for  $\text{CH}_2\text{Cl}_2$  which was distilled before use. Water was purified by a Milli-Q system and degassed by letting through nitrogen gas. All reactions were carried out under a nitrogen atmosphere. Semi-automatic flash chromatography was performed using Merck silica gel 60 (0.040-0.063 mm), on a Biotage HPFC SP4 Flash Purification System.  $^1\text{H}$  and  $^{13}\text{C}$  NMR spectra were recorded at 300 K on a Bruker Avance III 400 operating at 400 MHz and 101 MHz, respectively, with chemical shifts calibrated relative to solvent residual peaks ( $^1\text{H}$  NMR ( $\text{DMSO}-d_6$ ):  $\delta$  2.50 ppm;  $^1\text{H}$  NMR ( $\text{CDCl}_3$ ):  $\delta$  7.26 ppm;  $^{13}\text{C}$  NMR ( $\text{DMSO}-d_6$ ):  $\delta$  39.52 ppm;  $^{13}\text{C}$  NMR ( $\text{CDCl}_3$ ):  $\delta$  77.16 ppm). Assignments are based on chemical shifts and/or COSY, HSQC and NOESY spectra. Mass spectra were recorded on a Bruker MicroTOF-Q II (ESI) spectrometer. Reactions were monitored by thin-layer chromatography (TLC) carried out on 0.25 mm E. Merck silica gel plates (60F-254) using UV-light and HPLC using a Dionex 120A C18 column ( $5\mu$ , 4.6x150 mm) with gradient elution of MeCN and water, both solvents containing 0.05% trifluoroacetic acid (TFA), at a flow rate of 1  $\text{mL min}^{-1}$  and UV detection at 230, 254 and 320 nm. HPLC purification was performed by using a Phenomenex Luna C18  $5\mu$  column (250x21.20 mm) with gradient elution of MeCN and water, both solvents containing 0.05% TFA, at a flow rate of 20  $\text{mL min}^{-1}$ .

## Synthesis of phenanthroline ligands

Ligands **L1**(DPPhen)<sup>1</sup> and **G**<sup>2</sup> were prepared as described previously.

### *N*<sup>4</sup>,*N*<sup>7</sup>-Dimethyl-1,10-phenanthroline-4,7-diamine (Ligand **L2**)

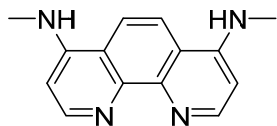

A sealed vial containing 4,7-dichloro-1,10-phenanthroline (300 mg, 1.2 mmol) and methylamine (5.0 mL, 33% in EtOH, 40 mmol) was heated in a microwave reactor (Emrys Creator) at 150 °C for 40 min to give an orange mixture with a precipitate. The precipitate was isolated by filtration, washed with water, ethanol and diethyl ether, and dried under vacuum to give the title compound as a pale yellow solid (255 mg, 89% yield). m.p. > 250 °C;  $^1\text{H}$  NMR (400 MHz,  $\text{DMSO}-d_6$ )  $\delta$  8.73 (s, 2H), 8.53 (d,  $J$  = 6.2 Hz, 2H), 8.36 (s, 2H), 6.84 (d,  $J$  = 6.3 Hz, 2H), 3.04 ppm (d,  $J$  = 4.4 Hz, 6H);  $^{13}\text{C}$  NMR (101 MHz,  $\text{DMSO}-d_6$ )  $\delta$  153.6, 145.8, 137.3, 118.2, 117.0, 101.1, 29.7 ppm. HRMS-ESI:  $m/z$  calcd for  $\text{C}_{14}\text{H}_{15}\text{N}_4^+$ : 239.1291 [ $M+\text{H}^+$ ], found: 239.1298.

### *N*<sup>4</sup>,*N*<sup>7</sup>-Bis(2-hydroxyethyl)-1,10-phenanthroline-4,7-diamine (Ligand **L3**, BHPPhen)

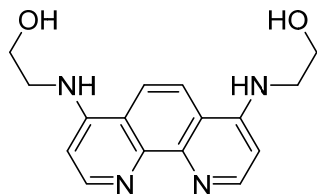

A sealed vial containing 4,7-dichloro-1,10-phenanthroline (747 mg, 3.0 mmol), 2-aminoethanol (1.81 mL, 30.0 mmol) and anhydrous EtOH (15.0 mL) was heated in a microwave reactor (Biotage Initiator<sup>+</sup> EU) at 140 °C for 3 hours to give a red mixture with a precipitate. The precipitate was isolated by filtration, washed sequentially with water, ethanol and diethyl ether, and dried under vacuum to give the title compound as a pale yellow solid (795 mg, 89% yield). m.p. > 250 °C;  $^1\text{H}$  NMR (400 MHz,  $\text{DMSO}-d_6$ )  $\delta$  8.48 (d,  $J$  = 5.3 Hz, 2H), 8.06 (s, 2H), 7.19–7.03 (m, 2H), 6.67 (d,  $J$  = 5.4 Hz, 2H), 4.91 (s, 2H), 3.70 (t,  $J$  = 5.7 Hz, 4H), 3.42–3.35 ppm (m, 4H);  $^{13}\text{C}$  NMR (101 MHz,  $\text{DMSO}-d_6$ )  $\delta$  150.2, 149.4, 146.3, 117.4, 117.2, 100.7, 58.9, 45.3 ppm. HRMS-ESI:  $m/z$  calcd for  $\text{C}_{16}\text{H}_{19}\text{N}_4\text{O}_2^+$ : 299.1503 [ $M+\text{H}^+$ ], found: 299.1514.

**Table S1: Ligand screening for the coupling of adenine and iodobenzene**

| 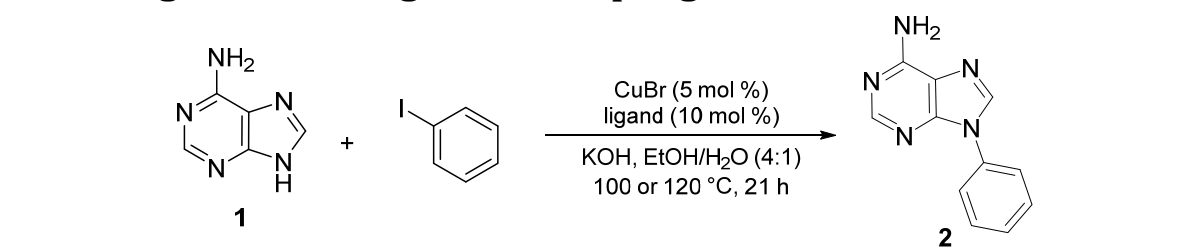                                                                                                                                                                                                                                                                                                                                                                                                                                                                                                                                                                               |           |              |                                |                           |
|------------------------------------------------------------------------------------------------------------------------------------------------------------------------------------------------------------------------------------------------------------------------------------------------------------------------------------------------------------------------------------------------------------------------------------------------------------------------------------------------------------------------------------------------------------------------------------------------------------------------------------------------------------------|-----------|--------------|--------------------------------|---------------------------|
| <div style="display: flex; justify-content: space-around; align-items: flex-end;"> <div style="text-align: center;"> <br/> <b>A</b> </div> <div style="text-align: center;"> <br/> <b>B</b> </div> <div style="text-align: center;"> <br/> <b>C</b> </div> <div style="text-align: center;"> <br/> <b>D</b> </div> </div> |           |              |                                |                           |
| <div style="display: flex; justify-content: space-around; align-items: flex-end;"> <div style="text-align: center;"> <br/> <b>E</b> </div> <div style="text-align: center;"> <br/> <b>F</b> </div> <div style="text-align: center;"> <br/> <b>G</b> </div> </div>                                                                                                                                           |           |              |                                |                           |
| entry                                                                                                                                                                                                                                                                                                                                                                                                                                                                                                                                                                                                                                                            | ligand    | temp<br>(°C) | conversion<br>(%) <sup>b</sup> | yield<br>(%) <sup>c</sup> |
| 1                                                                                                                                                                                                                                                                                                                                                                                                                                                                                                                                                                                                                                                                | <b>A</b>  | 100          | <1                             | ND                        |
| 2                                                                                                                                                                                                                                                                                                                                                                                                                                                                                                                                                                                                                                                                | <b>B</b>  | 100          | 6                              | ND                        |
| 3                                                                                                                                                                                                                                                                                                                                                                                                                                                                                                                                                                                                                                                                | <b>C</b>  | 100          | 2                              | ND                        |
| 4                                                                                                                                                                                                                                                                                                                                                                                                                                                                                                                                                                                                                                                                | <b>D</b>  | 100          | 13                             | ND                        |
| 5                                                                                                                                                                                                                                                                                                                                                                                                                                                                                                                                                                                                                                                                | <b>E</b>  | 100          | <1                             | ND                        |
| 6                                                                                                                                                                                                                                                                                                                                                                                                                                                                                                                                                                                                                                                                | <b>L1</b> | 100          | 22                             | 19                        |
| 7                                                                                                                                                                                                                                                                                                                                                                                                                                                                                                                                                                                                                                                                | <b>L2</b> | 100          | 31                             | 20                        |
| 8                                                                                                                                                                                                                                                                                                                                                                                                                                                                                                                                                                                                                                                                | <b>F</b>  | 120          | 32                             | 30                        |
| 9                                                                                                                                                                                                                                                                                                                                                                                                                                                                                                                                                                                                                                                                | <b>G</b>  | 120          | <1                             | ND                        |
| 10                                                                                                                                                                                                                                                                                                                                                                                                                                                                                                                                                                                                                                                               | <b>L1</b> | 120          | 65                             | 46                        |
| 11                                                                                                                                                                                                                                                                                                                                                                                                                                                                                                                                                                                                                                                               | <b>L2</b> | 120          | ND                             | 56                        |

Reaction conditions: **1** (0.60 mmol), iodobenzene (0.50 mmol), ligand (10 mol %), CuBr (5 mol %), KOH (1.0 mmol), EtOH/H<sub>2</sub>O (1.0 mL, 4:1), heated in a sealed vial to 100 °C or 120 °C for 18 h. <sup>b</sup> Determined from integration of the area under the signal of **2** (HPLC; UV absorbtion at 254 nm) as the percentage of the total area of the signals corresponding to **1** and **2**. <sup>c</sup> Yield of isolated product. ND: not determined.

## Reaction optimisation

**Entry 1:** A reaction tube equipped with a magnetic stirring bar was charged with CuBr (3.6 mg, 0.025 mmol), ligand (**L1**, 15.9 mg, 0.05 mmol), adenine (**1**, 81 mg, 0.60 mmol) and KOH (56.1 mg, 1.0 mmol). The tube was sealed with a rubber septum, evacuated and back-filled with nitrogen three times. EtOH/H<sub>2</sub>O (4:1 v/v, 1 mL) and iodobenzene (56  $\mu$ L, 0.50 mmol) was added by syringe. The rubber septum was exchanged with a cap designed to withstand moderate pressure under a stream of nitrogen and the reaction tube was placed in a preheated oil bath at 120 °C. After 21 hours, the reaction mixture was cooled to RT, silica (1.5 g) was added and the mixture was concentrated to dryness on a rotary evaporator. The dry residue was purified by semi-automated flash column chromatography (Biotage SNAP 10 g, MeOH in CH<sub>2</sub>Cl<sub>2</sub> (3%  $\rightarrow$  5%)), to provide 49 mg (46%) of 9-phenyladenine (**2**).<sup>3</sup>

Entries 2-19 were performed by the same procedure, but with the modifications indicated in Table 1.

## General procedure for *N*<sup>9</sup>-arylation of adenine (Table 2)

A reaction tube equipped with a magnetic stirring bar was charged with CuBr (3.6 mg, 0.025 mmol), ligand (**L3**, 14.9 mg, 0.05 mmol), sodium ascorbate (10 mg, 0.05 mmol), adenine (67.6 mg, 0.50 mmol), KOH (56.1 mg, 1.0 mmol) and aryl halide (if solid, 0.75 mmol). The reaction tube was sealed with a rubber septum, evacuated and back-filled with nitrogen three times. DMF/H<sub>2</sub>O (4:1 v/v, 1 mL) and aryl halide (if liquid, 0.75 mmol) was added by syringe. The rubber septum was exchanged with a cap designed to withstand moderate pressure under a stream of nitrogen and the reaction tube was placed in a preheated oil bath at 120 °C. After 21 hours (for aryl bromides 48 hours), the reaction mixture was cooled to RT, silica (1.5 g) was added and the mixture was concentrated to dryness on a rotary evaporator. The dry residue was purified by semi-automated flash column chromatography. In some cases an inorganic iodide salt eluted with the product on the column, which was removed by recrystallisation from H<sub>2</sub>O or MeOH. Known compounds exhibited <sup>1</sup>H and <sup>13</sup>C NMR in agreement with previously reported data cited below and ESI-MS was in agreement with the predicted molecular mass.

### 3-(6-Aminopurin-9-yl)phenol (**3a**)

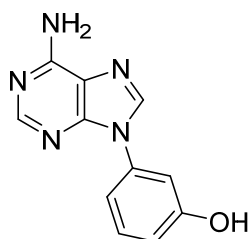

Following the general procedure using 3-iodophenol (165 mg, 0.75 mmol) provided the title compound as a white solid after semi-automated flash chromatography (Biotage SNAP 10 g, MeOH in CH<sub>2</sub>Cl<sub>2</sub> (4%  $\rightarrow$  7%)), followed by a recrystallisation from water. Yield: 101 mg (89%). m.p. >250 °C; <sup>1</sup>H NMR (400 MHz, DMSO-*d*<sub>6</sub>)  $\delta$  9.89 (s, 1H), 8.54 (s, 1H), 8.22 (s, 1H), 7.45–7.29 (m, 4H), 7.29–7.24 (m, 1H), 6.88–6.78 ppm (m, 1H); <sup>13</sup>C NMR (101 MHz, DMSO-*d*<sub>6</sub>)  $\delta$  158.1, 156.3, 153.1, 149.1, 139.6, 136.1, 130.3, 119.4, 114.4, 113.2, 110.0 ppm; HRMS-ESI: *m/z* calcd for C<sub>11</sub>H<sub>10</sub>N<sub>5</sub>O<sup>+</sup>: 228.0880 [*M*+H<sup>+</sup>], found: 228.0884.

### 9-(4-Aminophenyl)purin-6-amine (3b)

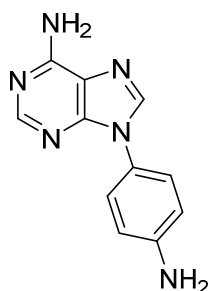

**Using 4-iodoaniline:** Following the general procedure using 4-iodoaniline (164 mg, 0.75 mmol) and heating for 21 hours provided the title compound as a pale tan solid after semi-automated flash chromatography (Biotage SNAP 10 g, MeOH in CH<sub>2</sub>Cl<sub>2</sub> (6% → 10%)), followed by a recrystallisation from water. Yield: 100 mg (88%).

**Using 4-bromoaniline:** Following the general procedure using 4-bromoaniline (129 mg, 0.75 mmol) and heating for 48 hours provided the title compound as a pale tan solid after semi-automated flash chromatography (Biotage SNAP 25 g, 10% MeOH in CH<sub>2</sub>Cl<sub>2</sub>). Yield: 86 mg (76%).

**9-(4-Aminophenyl)purin-6-amine (3b):** m.p. > 250 °C; <sup>1</sup>H NMR (400 MHz, DMSO-*d*<sub>6</sub>) δ 8.32 (s, 1H), 8.14 (s, 1H), 7.38 (d, *J* = 8.6 Hz, 2H), 7.26 (s, 2H), 6.69 (d, *J* = 8.6 Hz, 2H), 5.36 ppm (s, 2H); <sup>13</sup>C NMR (101 MHz, DMSO-*d*<sub>6</sub>) δ 156.1, 152.7, 149.3, 148.4, 140.0, 124.6, 123.5, 119.0, 113.8 ppm; HRMS-ESI: *m/z* calcd for C<sub>11</sub>H<sub>11</sub>N<sub>6</sub><sup>+</sup>: 227.1040 [*M*+H<sup>+</sup>], found: 227.1042.

### 3-(6-Aminopurin-9-yl)benzoic acid (3c)

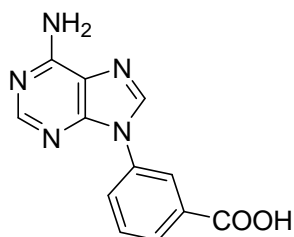

Following the general procedure using 3-iodobenzoic acid (186 mg, 0.75 mmol) provided the title compound as a tan solid after semi-automated flash chromatography (Biotage SNAP 25 g, MeOH/AcOH 2:1 in CH<sub>2</sub>Cl<sub>2</sub> (6% → 12%)), followed by a recrystallisation from MeOH. Yield: 84 mg (66%). m.p. >250 °C; <sup>1</sup>H NMR (400 MHz, DMSO-*d*<sub>6</sub>) δ 13.32 (s, 1H), 8.68 (s, 1H), 8.51 (s, 1H), 8.32–8.20 (m, 1H), 8.19–8.11 (m, 1H), 8.07–7.94 (m, 1H), 7.81–7.68 (m, 1H), 7.42 ppm (s, 2H); HRMS-ESI: *m/z* calcd for C<sub>12</sub>H<sub>10</sub>N<sub>5</sub>O<sub>2</sub><sup>+</sup>: 256.0829 [*M*+H<sup>+</sup>], found: 256.0831.

### 3-(6-Aminopurin-9-yl)benzonitrile (3d)

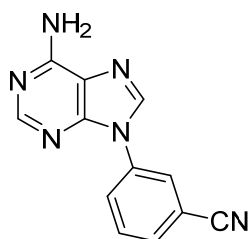

Following the general procedure using 3-iodobenzonitrile (172 mg, 0.75 mmol) provided the title compound as an off-white solid after semi-automated flash chromatography (Biotage SNAP 10 g, MeOH in CH<sub>2</sub>Cl<sub>2</sub> (4% → 8%)), followed by a recrystallisation from H<sub>2</sub>O. Yield: 91 mg (77%). m.p. >250 °C; <sup>1</sup>H NMR (400 MHz, DMSO-*d*<sub>6</sub>) δ 8.71 (s, 1H), 8.48 (t, *J* = 1.7 Hz, 1H), 8.40–8.32 (m, 1H), 8.25 (s, 1H), 7.95–7.87 (m, 1H), 7.81 (t, *J* = 8.0 Hz, 1H), 7.47 ppm (s, 2H); <sup>13</sup>C NMR (101 MHz, DMSO-*d*<sub>6</sub>) δ 156.4, 153.4, 149.0, 139.3, 135.9, 130.8, 130.8, 127.2, 125.8, 119.3, 118.1, 112.3 ppm; HRMS-ESI: *m/z* calcd for C<sub>12</sub>H<sub>9</sub>N<sub>6</sub><sup>+</sup>: 237.0883 [*M*+H<sup>+</sup>], found: 237.0881.

### 9-(3-(Trifluoromethyl)phenyl)purin-6-amine (3e)

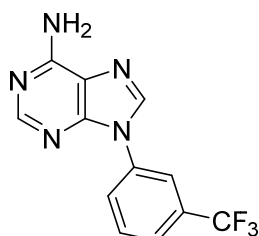

Following the general procedure using 1-iodo-3-(trifluoromethyl)benzene (204 mg, 0.75 mmol) provided the title compound as a white solid after semi-automated flash chromatography (Biotage SNAP 10 g, MeOH in CH<sub>2</sub>Cl<sub>2</sub> (4% → 6%)). Yield: 116.5 mg (83%). m.p. 226–228°C; <sup>1</sup>H NMR (400 MHz, DMSO-*d*<sub>6</sub>) δ 8.74 (s, 1H), 8.40 (s, 1H), 8.33–8.26 (m, 1H), 8.25 (s, 1H), 7.88–7.76 (m, 2H), 7.46 ppm (s, 2H); <sup>13</sup>C NMR (101 MHz, DMSO-*d*<sub>6</sub>) δ 156.4, 153.4, 149.1, 139.5, 135.9, 130.8, 130.2 (q, *J* = 32.2 Hz), 126.4, 123.8 (q, *J* = 272.5 Hz), 123.8 (q, *J* = 3.6 Hz), 119.3, 119.2 ppm (q, *J* = 3.9 Hz); HRMS-ESI: *m/z* calcd for C<sub>12</sub>H<sub>9</sub>F<sub>3</sub>N<sub>5</sub><sup>+</sup>: 280.0805 [*M*+H<sup>+</sup>], found: 280.0818.

### 9-(3-Nitrophenyl)purin-6-amine (3f)

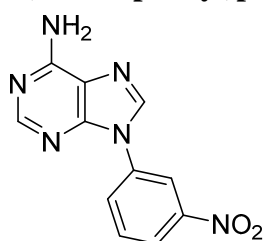

Following the general procedure using 1-iodo-3-nitrobenzene (187 mg, 0.75 mmol) provided the title compound as a yellow solid after semi-automated flash chromatography (Biotage SNAP 10 g, MeOH in CH<sub>2</sub>Cl<sub>2</sub> (3% → 5%)), followed by a recrystallisation from water. Yield: 104 mg (81%). m.p. >250 °C; <sup>1</sup>H NMR (400 MHz, DMSO-*d*<sub>6</sub>) δ 8.96 (t, *J* = 2.2 Hz, 1H), 8.80 (s, 1H), 8.48–8.40 (m, 1H), 8.31–8.24 (m, 2H), 7.89 (t, *J* = 8.2 Hz, 1H), 7.49 ppm (s, 2H); <sup>13</sup>C NMR (101 MHz, DMSO-*d*<sub>6</sub>) δ 156.4, 153.4, 149.1, 148.3, 139.4, 136.2, 131.0, 128.4, 121.7, 119.3, 117.1 ppm; HRMS-ESI: *m/z* calcd for C<sub>11</sub>H<sub>9</sub>N<sub>6</sub>O<sub>2</sub><sup>+</sup>: 257.0781 [*M*+H<sup>+</sup>], found: 257.0794.

### 9-(2-Chlorophenyl)purin-6-amine (3g)

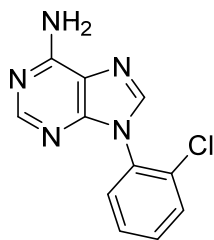

Following the general procedure using 1-chloro-2-iodobenzene (179 mg, 0.75 mmol) provided the title compound as a white solid after semi-automated flash chromatography (Biotage SNAP 10 g, MeOH in CH<sub>2</sub>Cl<sub>2</sub> (3% → 5%)). Yield: 2.2 mg (2%). m.p. 233-234 °C; <sup>1</sup>H NMR (400 MHz, DMSO-*d*<sub>6</sub>) δ 8.33 (s, 1H), 8.11 (s, 1H), 7.79–7.73 (m, 1H), 7.69–7.64 (m, 1H), 7.64–7.53 (m, 2H), 7.39 ppm (s, 2H); <sup>13</sup>C NMR (101 MHz, DMSO-*d*<sub>6</sub>) δ 156.2, 153.2, 150.2, 140.6, 132.1, 131.0, 130.7, 130.2, 130.1, 128.3, 118.2 ppm; HRMS-ESI: *m/z* calcd for C<sub>11</sub>H<sub>9</sub>ClN<sub>5</sub><sup>+</sup>: 246.0541 [*M*+H<sup>+</sup>], found: 246.0553.<sup>4</sup>

### 9-(*o*-Tolyl)purin-6-amine (3h)

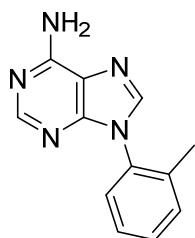

Following the general procedure using 2-iodotoluene (164 mg, 0.75 mmol) provided the title compound as a white solid after semi-automated flash chromatography (Biotage SNAP 10 g, MeOH in CH<sub>2</sub>Cl<sub>2</sub> (3% → 5%)). Yield: 7.5 mg (7%). <sup>1</sup>H NMR (400 MHz, DMSO-*d*<sub>6</sub>) δ 8.26 (s, 1H), 8.11 (s, 1H), 7.49–7.45 (m, 2H), 7.40–7.37 (m, 2H), 7.35 (s, 2H), 2.08 ppm (s, 3H); <sup>13</sup>C NMR (101 MHz, DMSO-*d*<sub>6</sub>) δ 156.3, 153.0, 150.1, 140.8, 134.9, 133.7, 131.0, 129.2, 127.8, 126.8, 118.4, 17.5 ppm; HRMS-ESI: *m/z* calcd for C<sub>12</sub>H<sub>12</sub>N<sub>5</sub><sup>+</sup>: 226.1087 [*M*+H<sup>+</sup>], found: 226.1088.<sup>5\*</sup>

### 9-(Pyridin-2-yl)purin-6-amine (3i)

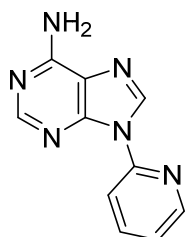

Following the general procedure using 2-bromopyridine (118 mg, 0.75 mmol) provided the title compound as a white solid after semi-automated flash chromatography (Biotage SNAP 10 g, MeOH in CH<sub>2</sub>Cl<sub>2</sub> (4% → 6%)). Yield: 87 mg (82%). m.p. 230-231 °C; <sup>1</sup>H NMR (400 MHz, DMSO-*d*<sub>6</sub>) δ 8.88 (s, 1H), 8.62–8.53 (m, 2H), 8.29 (s, 1H), 8.15–8.07 (m, 1H), 7.54–7.40 ppm (m, 3H); <sup>13</sup>C NMR (101 MHz, DMSO-*d*<sub>6</sub>) δ 156.4, 153.3, 148.7, 148.7, 148.2, 139.5, 138.0, 122.7, 119.9, 115.1 ppm; HRMS-ESI: *m/z* calcd for C<sub>10</sub>H<sub>9</sub>N<sub>6</sub><sup>+</sup>: 213.0883 [*M*+H<sup>+</sup>], found: 213.0876.

\* <sup>1</sup>H NMR is not in agreement with that reported by Tao *et al.*<sup>5</sup> No <sup>13</sup>C NMR has been reported previously.

### 9-(6-Methylpyridin-3-yl)purin-6-amine (3j)

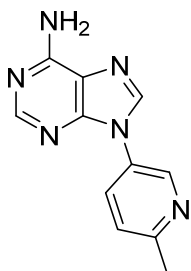

Following the general procedure using 5-bromo-2-methylpyridine (129 mg, 0.75 mmol) provided the title compound as a white solid after semi-automated flash chromatography (Biotage SNAP 10 g, MeOH in CH<sub>2</sub>Cl<sub>2</sub> (3% → 6%)). Yield: 92 mg (81%). m.p. 259-260 °C (dec.); <sup>1</sup>H NMR (400 MHz, DMSO-*d*<sub>6</sub>) δ 8.95 (d, *J* = 2.4 Hz, 1H), 8.61 (s, 1H), 8.27 – 8.16 (m, 2H), 7.48 (d, *J* = 8.4 Hz, 1H), 7.43 (s, 2H), 2.55 ppm (s, 3H); <sup>13</sup>C NMR (101 MHz, DMSO-*d*<sub>6</sub>) δ 157.0, 156.4, 153.3, 149.2, 143.1, 139.4, 130.9, 129.6, 123.4, 119.1, 23.7 ppm; HRMS-ESI: *m/z* calcd for C<sub>11</sub>H<sub>11</sub>N<sub>6</sub><sup>+</sup>: 227.1040 [*M*+H<sup>+</sup>], found: 227.1029.

### 9-(Thiophen-3-yl)purin-6-amine (3k)

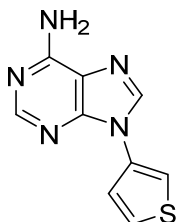

Following the general procedure using 3-bromothiophene (122 mg, 0.75 mmol) provided the title compound as a white solid after semi-automated flash chromatography (Biotage SNAP 10 g, MeOH in CH<sub>2</sub>Cl<sub>2</sub> (4% → 8%)). Yield: 83 mg (76%). m.p. 218-219 °C; <sup>1</sup>H NMR (400 MHz, DMSO-*d*<sub>6</sub>) δ 8.65 (s, 1H), 8.24 (s, 1H), 8.16 – 8.08 (m, 1H), 7.84 – 7.73 (m, 2H), 7.40 ppm (s, 2H); <sup>13</sup>C NMR (101 MHz, DMSO-*d*<sub>6</sub>) δ 156.3, 153.3, 148.7, 139.3, 133.3, 127.1, 121.8, 119.0, 114.5 ppm; HRMS-ESI: *m/z* calcd for C<sub>9</sub>H<sub>8</sub>N<sub>5</sub>S<sup>+</sup>: 218.0495 [*M*+H<sup>+</sup>], found: 218.0487.

### 4-(6-Aminopurin-9-yl)phenol (3l)

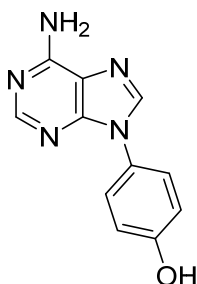

Following the general procedure using 4-bromophenol (130 mg, 0.75 mmol) provided the title compound as a white solid after semi-automated flash chromatography (Biotage SNAP 25 g, 10% MeOH in CH<sub>2</sub>Cl<sub>2</sub>). Yield: 72 mg (63%). m.p. 303-305 °C (dec.); <sup>1</sup>H NMR (400 MHz, DMSO-*d*<sub>6</sub>) δ 9.79 (s, 1H), 8.41 (s, 1H), 8.17 (s, 1H), 7.59 (d, *J* = 8.8 Hz, 2H), 7.31 (s, 2H), 6.93 ppm (d, *J* = 8.8 Hz, 2H); <sup>13</sup>C NMR (101 MHz, DMSO-*d*<sub>6</sub>) δ 156.8, 156.3, 153.0, 149.2, 139.9, 126.6, 124.9, 119.0, 115.8 ppm; HRMS-ESI: *m/z* calcd for C<sub>11</sub>H<sub>10</sub>N<sub>5</sub>O<sup>+</sup>: 228.0880 [*M*+H<sup>+</sup>], found: 228.0873.



### 1-(4-(6-Aminopurin-9-yl)phenyl)ethan-1-one (3m)

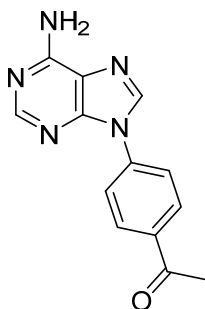

Following the general procedure using 4'-bromoacetophenone (149 mg, 0.75 mmol) provided the title compound as a yellow solid after semi-automated flash chromatography (Biotage SNAP 10 g, MeOH in CH<sub>2</sub>Cl<sub>2</sub> (3% → 5%)). Yield: 98 mg (77%). m.p. >250 °C; <sup>1</sup>H NMR (400 MHz, DMSO-*d*<sub>6</sub>) δ 8.74 (s, 1H), 8.25 (s, 1H), 8.19–8.14 (m, 4H), 7.45 (s, 2H), 2.64 ppm (s, 3H); <sup>13</sup>C NMR (101 MHz, DMSO-*d*<sub>6</sub>) δ 197.0, 156.4, 153.4, 149.1, 139.3, 139.0, 135.1, 129.6, 122.0, 119.5, 26.8 ppm; HRMS-ESI: *m/z* calcd for C<sub>13</sub>H<sub>12</sub>N<sub>5</sub>O<sup>+</sup>: 254.1036 [*M*+H<sup>+</sup>], found: 254.1047.

### 9-(4-Fluorophenyl)purin-6-amine (3n)

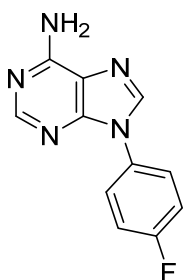

Following the general procedure using 1-bromo-4-fluorobenzene (131 mg, 0.75 mmol) provided the title compound as a white solid after semi-automated flash chromatography (Biotage SNAP 10 g, MeOH in CH<sub>2</sub>Cl<sub>2</sub> (3% → 5%)). Yield: 96 mg (84%). m.p. 255–256 °C; <sup>1</sup>H NMR (400 MHz, DMSO-*d*<sub>6</sub>) δ 8.56 (s, 1H), 8.20 (s, 1H), 7.96–7.90 (m, 2H), 7.47–7.42 (m, 2H), 7.39 ppm (s, 2H); <sup>13</sup>C NMR (101 MHz, DMSO-*d*<sub>6</sub>) δ 160.9 (d, *J* = 244.4 Hz), 156.3, 153.2, 149.1, 139.7, 131.5 (d, *J* = 2.8 Hz), 125.2 (d, *J* = 8.6 Hz), 119.1, 116.3 ppm (d, *J* = 22.9 Hz); HRMS-ESI: *m/z* calcd for C<sub>11</sub>H<sub>9</sub>FN<sub>5</sub><sup>+</sup>: 230.0836 [*M*+H<sup>+</sup>], found: 230.0836.<sup>6</sup>

### 2-(4-(6-Aminopurin-9-yl)phenyl)ethan-1-ol (3o)

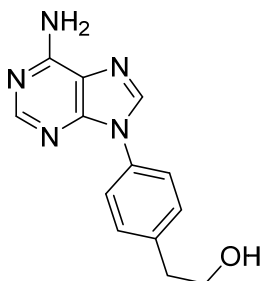

Following the general procedure using 4-bromophenethyl alcohol (151 mg, 0.75 mmol) provided the title compound as a white solid after semi-automated flash chromatography (Biotage SNAP 25 g, MeOH in CH<sub>2</sub>Cl<sub>2</sub> (5% → 8%)), followed by recrystallisation from H<sub>2</sub>O. Yield: 105 mg (82%). m.p. >250 °C; <sup>1</sup>H NMR (400 MHz, DMSO-*d*<sub>6</sub>) δ 8.53 (s, 1H), 8.20 (s, 1H), 7.80–7.73 (m, 2H), 7.44–7.40 (m, 2H), 7.37 (s, 2H), 4.70 (t, *J* = 5.2 Hz, 1H), 3.65 (td, *J* = 6.9, 5.3 Hz, 2H), 2.80 ppm (t, *J* = 6.9 Hz, 2H); <sup>13</sup>C NMR (101 MHz, DMSO-

$d_6$ )  $\delta$  156.3, 153.1, 149.2, 139.6, 139.1, 133.1, 129.9, 122.8, 119.2, 62.0, 38.5 ppm; HRMS-ESI:  $m/z$  calcd for  $C_{13}H_{14}N_5O^+$ : 256.1193 [ $M+H^+$ ], found: 256.1204.

### 9-(4-(2-Aminoethyl)phenyl)purin-6-amine (3p)

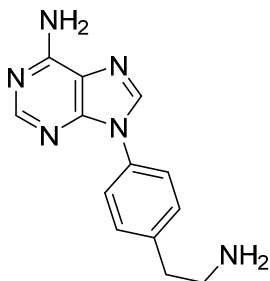

Following the general procedure using 4-bromophenethyl amine (151 mg, 0.75 mmol) and EtOH/H<sub>2</sub>O (1 mL, 4:1 v/v) as solvent provided the title compound as a pale yellow solid after semi-automated flash chromatography (Biotage SNAP 10 g, 24% NH<sub>3(aq)</sub>/MeOH 1:9 in CH<sub>2</sub>Cl<sub>2</sub> (5% → 8%)). Yield: 101 mg (79%). m.p. 219-220 °C; <sup>1</sup>H NMR (400 MHz, DMSO-*d*<sub>6</sub>)  $\delta$  8.53 (s, 1H), 8.19 (s, 1H), 7.82–7.74 (m, 2H), 7.42–7.38 (m, 2H), 7.37 (s, 2H), 2.81 (t,  $J$  = 6.9 Hz, 2H), 2.71 (t,  $J$  = 7.0 Hz, 2H), 1.47 ppm (s br, 2H); <sup>13</sup>C NMR (101 MHz, DMSO-*d*<sub>6</sub>)  $\delta$  156.3, 153.01, 149.1, 139.9, 139.6, 133.0, 129.6, 122.9, 119.2, 43.6, 39.3 ppm (merged with DMSO); HRMS-ESI:  $m/z$  calcd for  $C_{13}H_{15}N_6^+$ : 255.1353 [ $M+H^+$ ], found: 255.1355.

### *N*-(4-(6-Aminopurin-9-yl)phenethyl)formamide

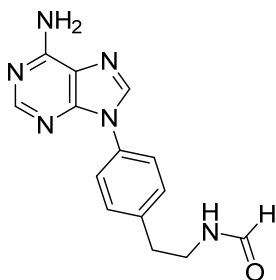

Following the general procedure using 4-bromophenethyl amine (151 mg, 0.75 mmol) and DMF/H<sub>2</sub>O (1 mL, 4:1 v/v) as solvent provided *N*-(4-(6-amino-9*H*-purin-9-yl)phenethyl)formamide as a pale yellow solid after semi-automated flash chromatography (Biotage SNAP 10g, MeOH in CH<sub>2</sub>Cl<sub>2</sub> (5% → 9%)). Yield: 112 mg (79%). m.p. 169-170 °C; <sup>1</sup>H NMR (400 MHz, DMSO-*d*<sub>6</sub>)  $\delta$  8.55 (s, 1H), 8.21 (s, 1H), 8.11 (s, 1H), 8.02 (d,  $J$  = 1.6 Hz, 1H), 7.81 (d,  $J$  = 8.5 Hz, 2H), 7.46–7.40 (m, 2H), 7.37 (s, 2H), 3.42–3.38 (m, 2H), 2.82 ppm (t,  $J$  = 7.1 Hz, 2H); <sup>13</sup>C NMR (101 MHz, DMSO-*d*<sub>6</sub>)  $\delta$  161.1, 156.3, 153.1, 149.1, 139.6, 138.7, 133.3, 129.7, 122.9, 119.3, 38.6, 34.5 ppm. HRMS-ESI:  $m/z$  calcd for  $C_{14}H_{15}N_6O^+$ : 283.1302 [ $M+H^+$ ], found: 283.1295.

## Synthetic procedure for *N*-arylation of various purines (Table 3)

### Preparation of 8-methyltheophylline (**4d**)

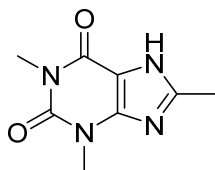

A sealed vial containing 5,6-diamino-1,3-dimethyluracil hydrate (565 mg, 3.0 mmol), acetic anhydride (0.31 mL, 3.3 mmol) and pyridine (6 mL) was heated in a microwave reactor (Emrys Creator) at 110 °C for 20 min to give a red mixture with a precipitate. The solvent was evaporated under vacuum to dryness. The resulting amide was converted to benzimidazole by treatment with *t*-BuOK (1.01 g, 9.0 mmol) in isopropyl alcohol (14 mL) at 60 °C. After 16 hours, the reaction mixture was cooled to RT, silica (5 g) was added and the mixture was concentrated to dryness on a rotary evaporator. The dry residue was purified by semi-automated flash column chromatography (Biotage SNAP 25 g, MeOH in CH<sub>2</sub>Cl<sub>2</sub> (3% → 4.5%)), to provide 382 mg (66%) of 8-methyltheophylline (**4d**). m.p. 322-324 °C (lit. 325 °C<sup>7</sup>); <sup>1</sup>H NMR (400 MHz, DMSO) δ 3.39 (s, 3H), 3.21 (s, 3H), 2.36 ppm (s, 3H); <sup>13</sup>C NMR (101 MHz, DMSO-*d*<sub>6</sub>) δ 153.9, 151.2, 150.4, 148.1, 106.1, 29.7, 27.6, 14.3 ppm. HRMS-ESI: *m/z* calcd for C<sub>14</sub>H<sub>15</sub>N<sub>6</sub>O<sup>+</sup>: 283.1302 [*M*+H<sup>+</sup>], found: 283.1295.

**General procedure A - purine, 2,6-diaminopurine, theophylline and 8-methyltheophylline (4a-d):** A reaction tube equipped with a magnetic stirring bar was charged with CuBr (3.6 mg, 0.025 mmol), ligand (**L3**, 14.9 mg, 0.05 mmol), sodium ascorbate (10 mg, 0.05 mmol), the purine substrate (**4a**, **4b**, **4c** or **4d**, 0.50 mmol) and KOH (56.1 mg, 1.0 mmol). The tube was sealed with a rubber septum, evacuated and back-filled with nitrogen three times. Then DMF/H<sub>2</sub>O (4:1 v/v, 1 mL) and aryl halide (0.75 mmol) was added by syringe. The rubber septum was exchanged with a cap designed to withstand moderate pressure under a stream of nitrogen and the reaction tube was placed in a preheated oil bath at 120 °C. After 21 hours or 48 hours, the reaction mixture was cooled to RT, silica (1.5 g) was added and the mixture was concentrated to dryness on a rotary evaporator. The dry residue was purified by semi-automated flash column chromatography.

**General procedure B - guanine and hypoxanthine (4e and 4f):** A reaction tube equipped with a magnetic stirring bar was charged with CuBr (3.6 mg, 0.025 mmol), ligand (**L3**, 14.9 mg, 0.05 mmol), the purine substrate (**4e** or **4f**, 0.50 mmol) and KOH (56.1 mg, 1.0 mmol). The tube was sealed with a rubber septum, evacuated and back-filled with nitrogen three times. Then DMSO/H<sub>2</sub>O (4:1 v/v, 1 mL) and aryl halide (0.75 mmol) was added by syringe. The rubber septum was exchanged with a cap designed to withstand moderate pressure under a stream of nitrogen and the reaction tube was placed in a preheated oil bath at 120 °C. After 6-48 hours, the reaction mixture was cooled to RT, silica (1.5 g) was added and the mixture concentrated to dryness on a rotary evaporator at 60 °C. The dry residue was purified by semi-automated flash column chromatography.

### 9-Phenylpurine (5a) and 7-phenylpurine(6a)

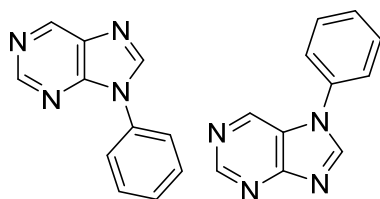

**Using iodobenzene:** Synthesised by general procedure A using iodobenzene (153 mg, 0.75 mmol) and heating for 21 hours. Purification by semi-automated flash chromatography (Biotage SNAP 10 g, MeOH in CH<sub>2</sub>Cl<sub>2</sub> (2% → 3%)) gave 61 mg (62%) of 9-phenylpurine (**5a**) and 7 mg (7%) of 7-phenylpurine (**6a**), both products as pale brown solids.

**Using bromobenzene:** Synthesised by general procedure A using bromobenzene (118 mg, 0.75 mmol) and heating for 48 hours. Purification by semi-automated flash chromatography (Biotage SNAP 10 g, MeOH in CH<sub>2</sub>Cl<sub>2</sub> (2% → 3%)) gave 63 mg (64%) of 9-phenylpurine (**5a**) and 3 mg (3%) of 7-phenylpurine (**6a**), both products as pale brown solids.

**9-phenylpurine (5a):** <sup>1</sup>H NMR (400 MHz, CDCl<sub>3</sub>) δ 9.24 (s, 1H), 9.05 (s, 1H), 8.38 (s, 1H), 7.78–7.67 (m, 2H), 7.66–7.55 (m, 2H), 7.53–7.44 ppm (m, 1H). <sup>13</sup>C NMR (101 MHz, CDCl<sub>3</sub>) δ 153.5, 151.2, 149.4, 144.3, 134.7, 134.3, 130.2, 128.7, 123.6 ppm; HRMS-ESI: *m/z* calcd for C<sub>11</sub>H<sub>9</sub>N<sub>4</sub><sup>+</sup>: 197.0822 [*M*+H<sup>+</sup>], found: 197.0823.<sup>8†</sup>

**7-phenylpurine (6a):** <sup>1</sup>H NMR (400 MHz, CDCl<sub>3</sub>) δ 9.21 (s, 1H), 9.06 (s, 1H), 8.47 (s, 1H), 7.68–7.62 (m, 2H), 7.59–7.51 ppm (m, 3H). <sup>13</sup>C NMR (101 MHz, CDCl<sub>3</sub>) δ 161.3, 154.0, 146.9, 140.8, 135.0, 130.8, 129.4, 125.3, 123.7 ppm; HRMS-ESI: *m/z* calcd for C<sub>11</sub>H<sub>9</sub>N<sub>4</sub><sup>+</sup>: 197.0822 [*M*+H<sup>+</sup>], found: 197.0826.<sup>9‡</sup>

### 9-Phenylpurine-2,6-diamine (5b)

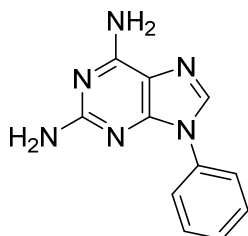

**Using iodobenzene:** Synthesised by general procedure A using iodobenzene (153 mg, 0.75 mmol) and heating for 21 hours. Purification by semi-automated flash chromatography (Biotage SNAP 10 g, MeOH in CH<sub>2</sub>Cl<sub>2</sub> (4% → 5%)) gave 106 mg (94%) of the title compound as a white solid.<sup>1</sup>

**Using bromobenzene:** Synthesised by general procedure A using bromobenzene (118 mg, 0.75 mmol) and heating for 48 hours. Purification by semi-automated flash chromatography (Biotage SNAP 10 g, MeOH in CH<sub>2</sub>Cl<sub>2</sub> (4% → 5%)) gave 68 mg (60%) of the title compound as a white solid.

<sup>†</sup> In accordance with the <sup>1</sup>H-NMR reported by Hayashi *et al.* No <sup>13</sup>C-NMR has been reported previously.

<sup>‡</sup> <sup>1</sup>H-NMR reported by Laufer *et al.* used DMSO-*d*<sub>6</sub> as solvent. No <sup>13</sup>C-NMR has been reported previously.

### 7-Phenyltheophylline (6c)

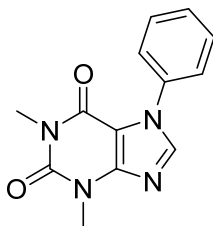

**Using iodobenzene:** Synthesised by general procedure A using iodobenzene (153 mg, 0.75 mmol) and heating for 48 hours. Purification by semi-automated flash chromatography (Biotage SNAP 10 g, EtOAc in PE (50% → 100%)) gave 101 mg (79%) of the title compound as a white solid.<sup>10</sup>

**Using bromobenzene:** Synthesised by general procedure A using bromobenzene (118 mg, 0.75 mmol) and heating for 48 hours. Purification by semi-automated flash chromatography (Biotage SNAP 10 g, EtOAc in PE (50% → 100%)) gave 100 mg (78%) of the title compound as a white solid.

### 8-methyl-7-phenyltheophylline (6d)

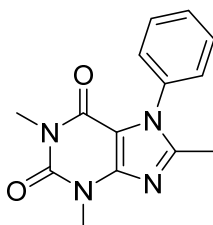

**Using iodobenzene:** Synthesised by general procedure A using iodobenzene (153 mg, 0.75 mmol) and heating for 48 hours. Purification by semi-automated flash chromatography (Biotage SNAP 10 g, EtOAc in PE (60% → 100%)) gave 16 mg (12%) of the title compound as a white solid.

**Using bromobenzene:** Synthesised by general procedure A using bromobenzene (118 mg, 0.75 mmol) and heating for 48 hours. Purification by semi-automated flash chromatography (Biotage SNAP 10 g, EtOAc in PE (60% → 100%)) gave 13 mg (10%) of the title compound as a white solid.

m.p. 230-231 °C (lit. 235 °C<sup>11</sup>); <sup>1</sup>H NMR (400 MHz, CDCl<sub>3</sub>) δ 7.57 – 7.49 (m, 3H), 7.38 – 7.28 (m, 2H), 3.63 (s, 3H), 3.34 (s, 3H), 2.36 ppm (s, 3H). <sup>13</sup>C NMR (101 MHz, CDCl<sub>3</sub>) δ 154.3, 151.8, 151.2, 148.6, 135.0, 129.6, 129.5, 127.1, 108.3, 29.9, 28.1, 13.9 ppm; HRMS-ESI: *m/z* calcd for C<sub>14</sub>H<sub>15</sub>N<sub>4</sub>O<sub>2</sub><sup>+</sup>: 271.1190 [*M*+H<sup>+</sup>], found: 271.1184.

### 9-Phenylguanine (5e) and 7-phenylguanine (6e)

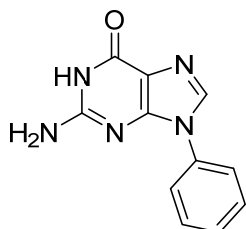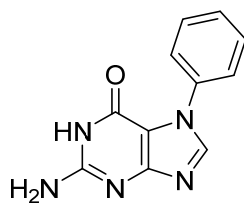

**Using iodobenzene:** Synthesised by general procedure B using iodobenzene (153 mg, 0.75 mmol) and heating for 21 hours. Purification by semi-automated flash chromatography (Biotage SNAP 25 g, MeOH in CH<sub>2</sub>Cl<sub>2</sub> (4% → 8%)) gave a mixture of two isomers: 9-phenylguanine (**5e**) and 7-phenylguanine (**6e**) that were separated on HPLC (5-22% MeCN in H<sub>2</sub>O (0-5 min), *R*<sub>t</sub>(**6e**) = 3.9 min, *R*<sub>t</sub>(**5e**) = 4.7 min) to give 68 mg (60%) of **5e** as a white solid and 24 mg (21%) of **6e** as a pale yellow solid.<sup>3,12</sup>

**Using bromobenzene:** Synthesised by general procedure B using bromobenzene (118 mg, 0.75 mmol) and heating for 48 hours. Purification by semi-automated flash chromatography (Biotage SNAP 10 g, MeOH in CH<sub>2</sub>Cl<sub>2</sub> (5% → 10%)) gave a mixture of two isomers: 9-phenylguanine (**5e**) and 7-phenylguanine (**6e**) that were separated on HPLC (5-22% MeCN in H<sub>2</sub>O (0-5 min), *R<sub>t</sub>*(**6e**) = 3.9 min, *R<sub>t</sub>*(**5e**) = 4.7 min) to give 67 mg (59%) of **5e** as a white solid and 15 mg (13%) of **6e** as a pale yellow solid.

### 9-Phenylhypoxanthine (**5f**) and 7-phenylhypoxanthine (**6f**)

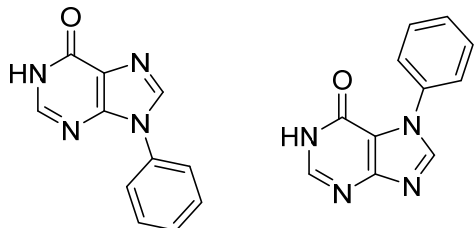

**Using iodobenzene:** Synthesised by general procedure B using iodobenzene (153 mg, 0.75 mmol) and heating for 3 hours, after which the starting material was almost consumed, and diarylated products had started to form. Purification by semi-automated flash chromatography (Biotage SNAP 10 g, MeOH in CH<sub>2</sub>Cl<sub>2</sub> (3% → 5%)) gave a mixture of two isomers: 9-phenylhypoxanthine (**5f**) and 7-phenylhypoxanthine (**6f**) that were separated on HPLC (10-21% MeCN in H<sub>2</sub>O (0-6 min), *R<sub>t</sub>*(**6f**) = 4.4 min, *R<sub>t</sub>*(**5f**) = 5.3 min) to give 46 mg (43%) of **5f** and 15 mg (14%) of **6f**, both as white solids.

**Using bromobenzene:** Synthesised by general procedure B using bromobenzene (118 mg, 0.75 mmol) and heating for 32 hours, after which the starting material was almost consumed, and diarylated products had started to form. Purification by semi-automated flash chromatography (Biotage SNAP 10 g, MeOH in CH<sub>2</sub>Cl<sub>2</sub> (3% → 5%)) gave a mixture of two isomers: 9-phenylhypoxanthine (**5f**) and 7-phenylhypoxanthine (**6f**) that were separated on HPLC (10-21% MeCN in H<sub>2</sub>O (0-6 min), *R<sub>t</sub>*(**6f**) = 4.4 min, *R<sub>t</sub>*(**5f**) = 5.3 min) to give 51 mg (48%) of **5f** and 12 mg (11%) of **6f**, both as white solids.

**9-phenylhypoxanthine (5f):** m.p. 317-318 °C (lit. 316-318 °C<sup>13</sup>); <sup>1</sup>H NMR (400 MHz, DMSO-*d*<sub>6</sub>) δ 12.47 (s, 1H), 8.47 (s, 1H), 8.09 (s, 1H), 7.83–7.69 (m, 2H), 7.67–7.55 (m, 2H), 7.55–7.44 ppm (m, 1H). <sup>13</sup>C NMR (101 MHz, DMSO-*d*<sub>6</sub>) δ 156.7, 147.9, 146.1, 139.4, 134.5, 129.5, 128.1, 124.8, 123.8 ppm; HRMS-ESI: *m/z* calcd for C<sub>11</sub>H<sub>9</sub>N<sub>4</sub>O<sup>+</sup>: 213.0771 [*M*+H<sup>+</sup>], found: 213.0761.<sup>13</sup>

**7-phenylhypoxanthine (6f):** m.p. 295-296 °C (lit. 295-297 °C<sup>14</sup>); <sup>1</sup>H NMR (400 MHz, DMSO-*d*<sub>6</sub>) δ 12.43 (s, 1H), 8.51 (s, 1H), 8.06 (s, 1H), 7.68–7.59 (m, 2H), 7.57–7.51 (m, 2H), 7.51–7.44 ppm (m, 1H). <sup>13</sup>C NMR (101 MHz, DMSO-*d*<sub>6</sub>) δ 158.2, 153.6, 145.2, 144.0, 135.4, 128.9, 128.2, 125.2, 114.6 ppm; HRMS-ESI: *m/z* calcd for C<sub>11</sub>H<sub>9</sub>N<sub>4</sub><sup>+</sup>: 213.0771 [*M*+H<sup>+</sup>], found: 213.0761.<sup>14</sup>

## References

- (1) Engel-Andreasen, J.; Shimpukade, B.; Ulven, T. *Green Chem.* **2013**, *15*, 336.
- (2) Hashemi, M. M.; Asadollahi, H.; Mostaghim, R. *Russ. J. Org. Chem.* **2005**, *41*, 623.
- (3) Keder, R.; Dvořáková, H.; Dvořák, D. *Eur. J. Org. Chem.* **2009**, 2009, 1522.
- (4) Koppel, H. C.; O'Brien, D. E.; Robins, R. K. *J. Am. Chem. Soc.* **1959**, *81*, 3046.
- (5) Tao, L.; Yue, Y.; Zhang, J.; Chen, S.-Y.; Yu, X.-Q. *Helv. Chim. Acta* **2008**, *91*, 1008.
- (6) Yahyazadeh, A.; Habibi, F. *E-J. Chem.* **2007**, *4*, 372.
- (7) Speer, J. H.; Raymond, A. L. *J. Am. Chem. Soc.* **1953**, *75*, 114.
- (8) Hayashi, E.; Shimada, N.; Matsuoka, Y. *Yakugaku Zasshi* **1979**, *99*, 114.
- (9) Laufer, S. A.; Domeyer, D. M.; Scior, T. R. F.; Albrecht, W.; Hauser, D. R. *J. Med. Chem.* **2005**, *48*, 710.
- (10) Kim, D.; Lee, H.; Jun, H.; Hong, S.-S.; Hong, S. *Bioorg. Med. Chem.* **2011**, *19*, 2508.
- (11) Taylor, E. C.; Yoneda, F. *J. Org. Chem.* **1972**, *37*, 4464.
- (12) Jacobsen, M. F.; Knudsen, M. M.; Gothelf, K. V. *J. Org. Chem.* **2006**, *71*, 9183.
- (13) El-Bayouki, K. A. M.; El-Sayed, A. S.; Basyouni, W. M. *Gazz. Chim. Ital.* **1989**, *119*, 163.
- (14) Gewald, K.; Heinhold, G. *Monatsh. Chem.* **1976**, *107*, 1413.

## NMR-spectra

### $N^4,N^7$ -dimethyl-1,10-phenanthroline (Ligand L2)

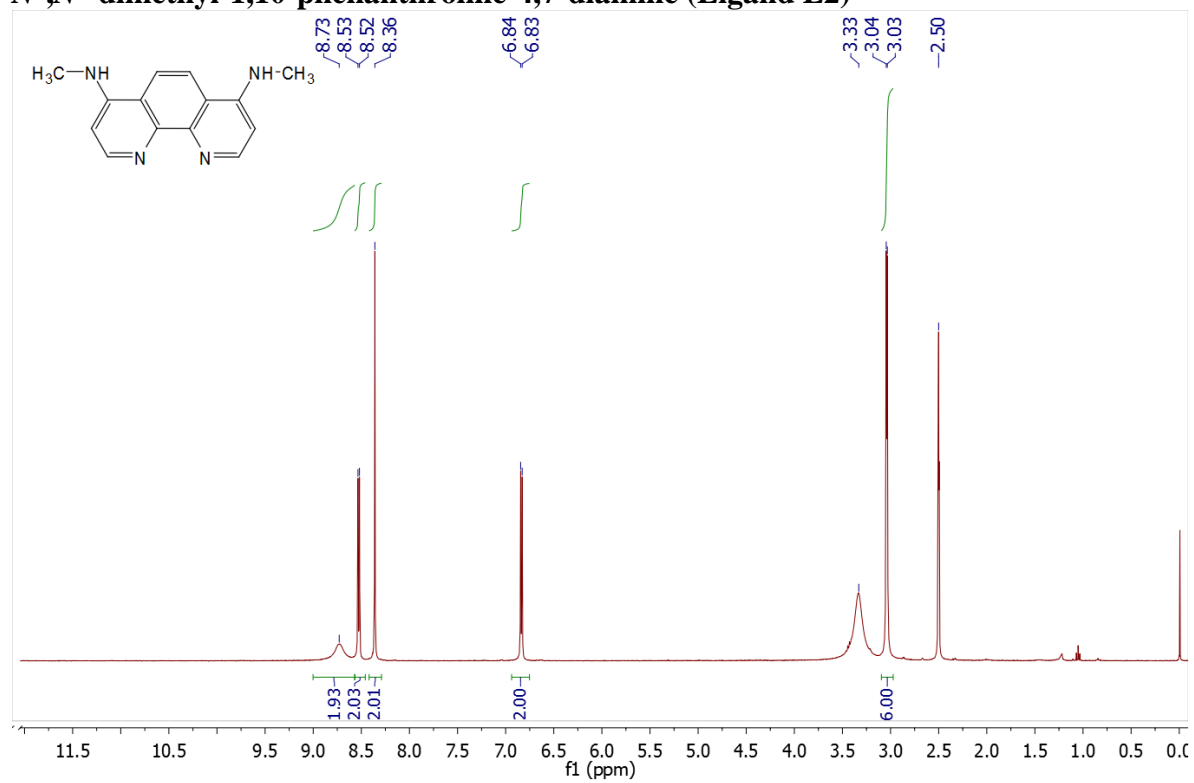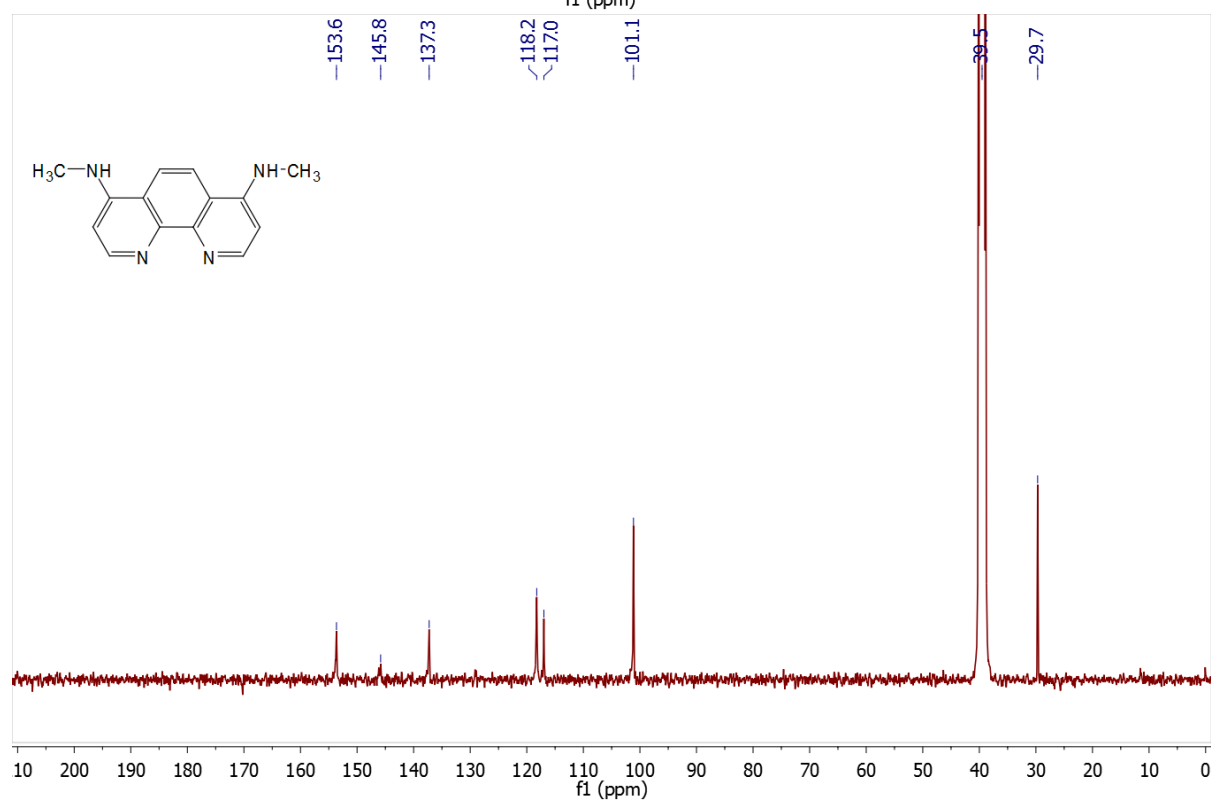

***N*<sup>4</sup>,*N*<sup>7</sup>-Bis(2-hydroxyethyl)-1,10-phenanthroline-4,7-diamine (Ligand L3).**

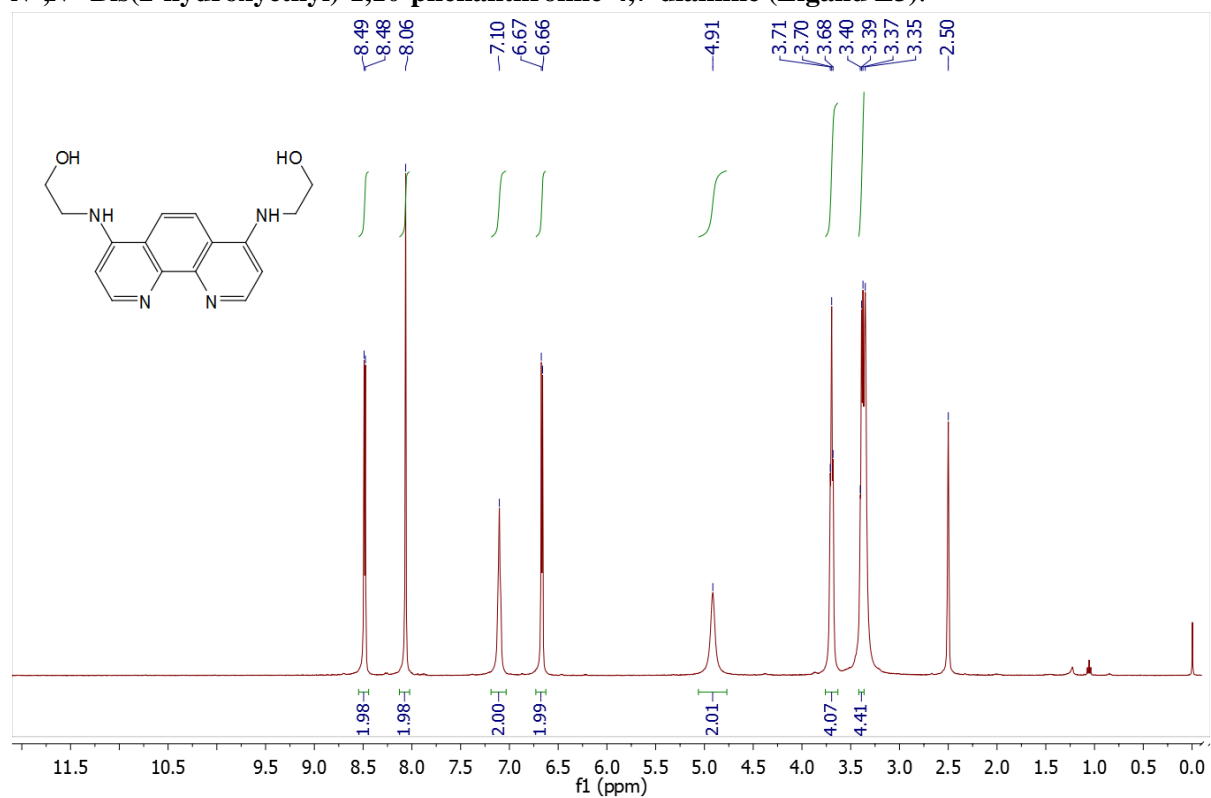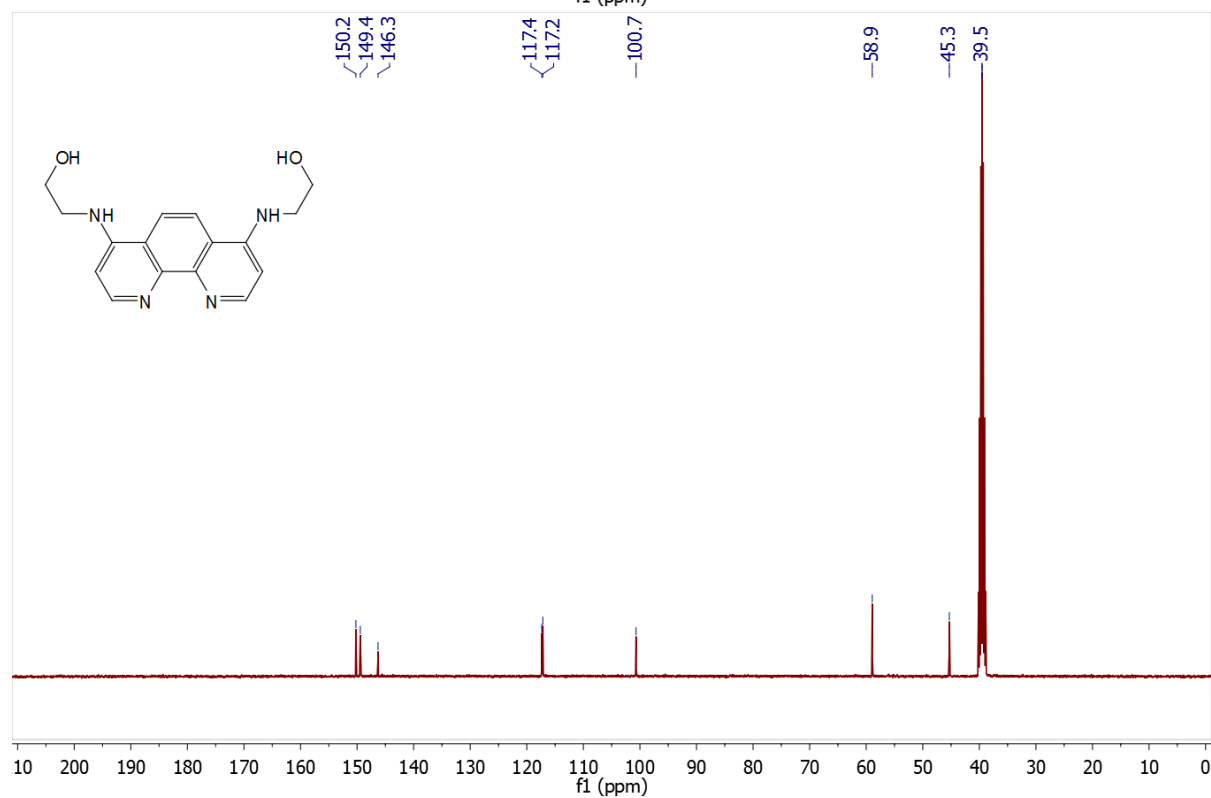



# 9-phenyladenine (2)

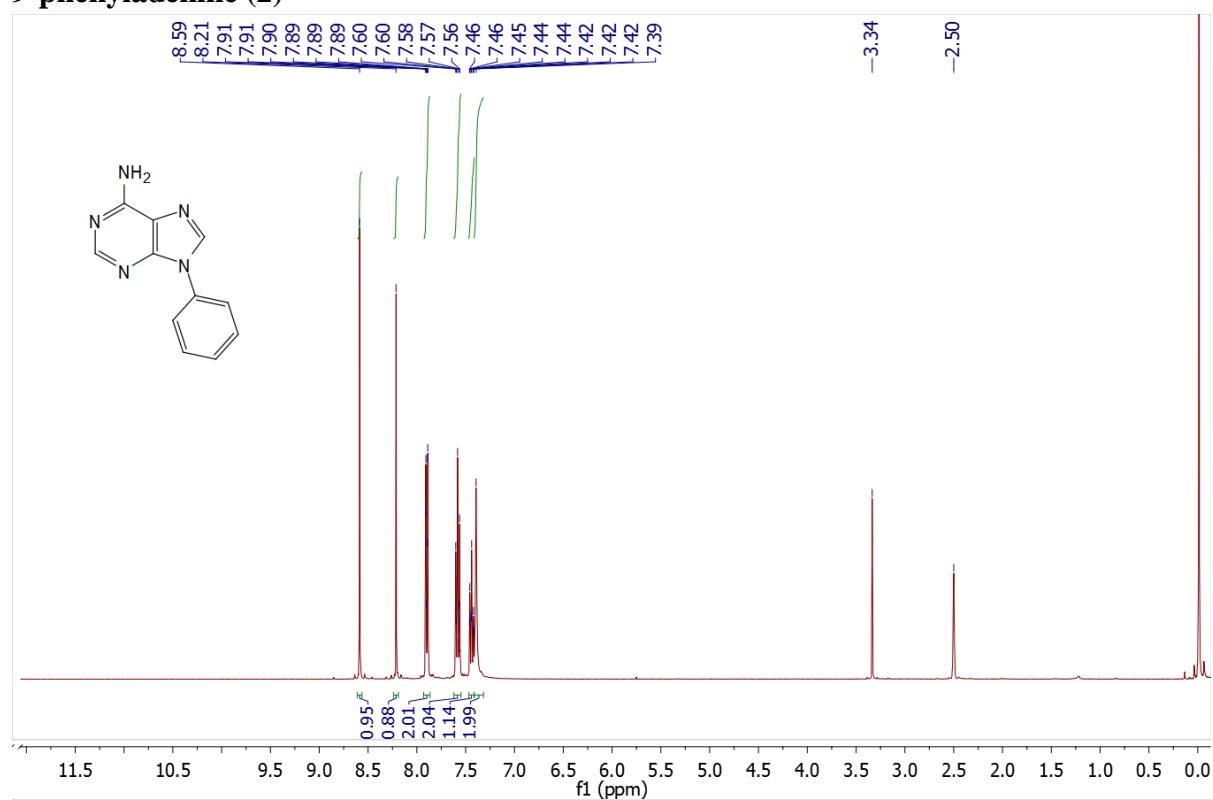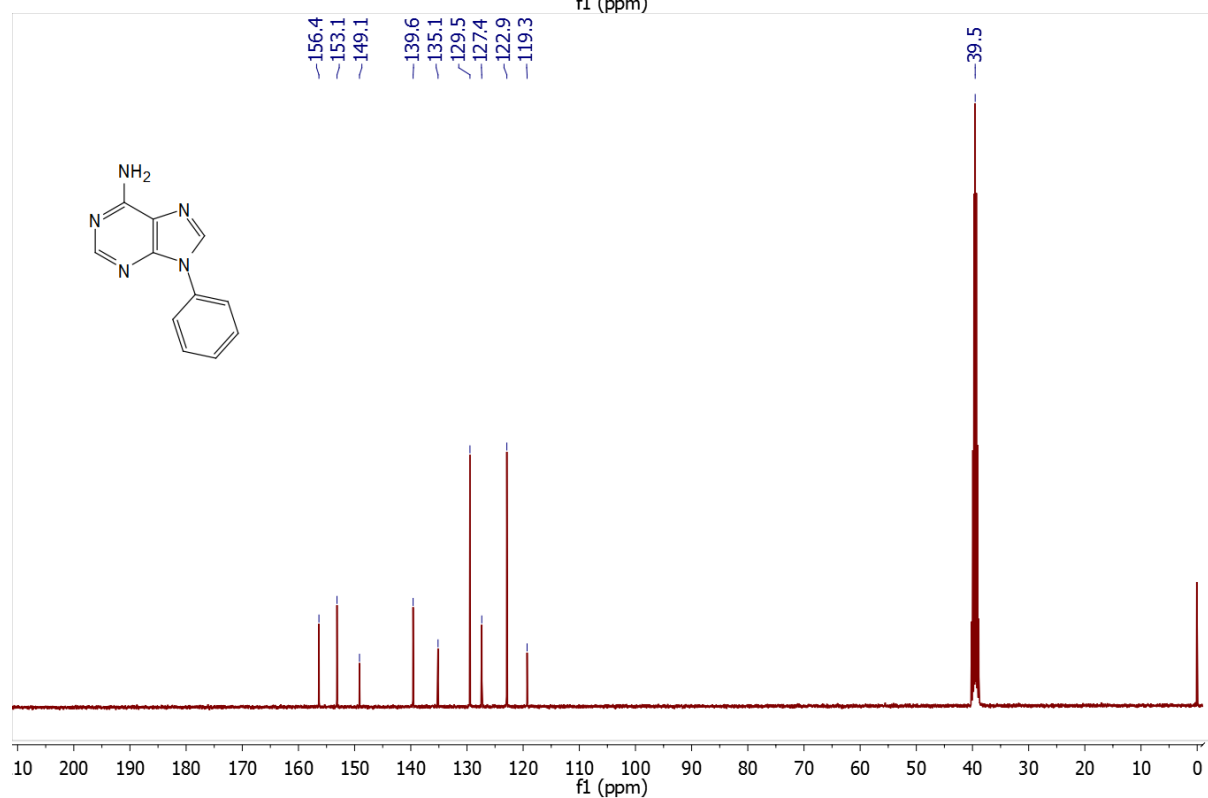

### 3-(6-Aminopurin-9-yl)phenol (3a)

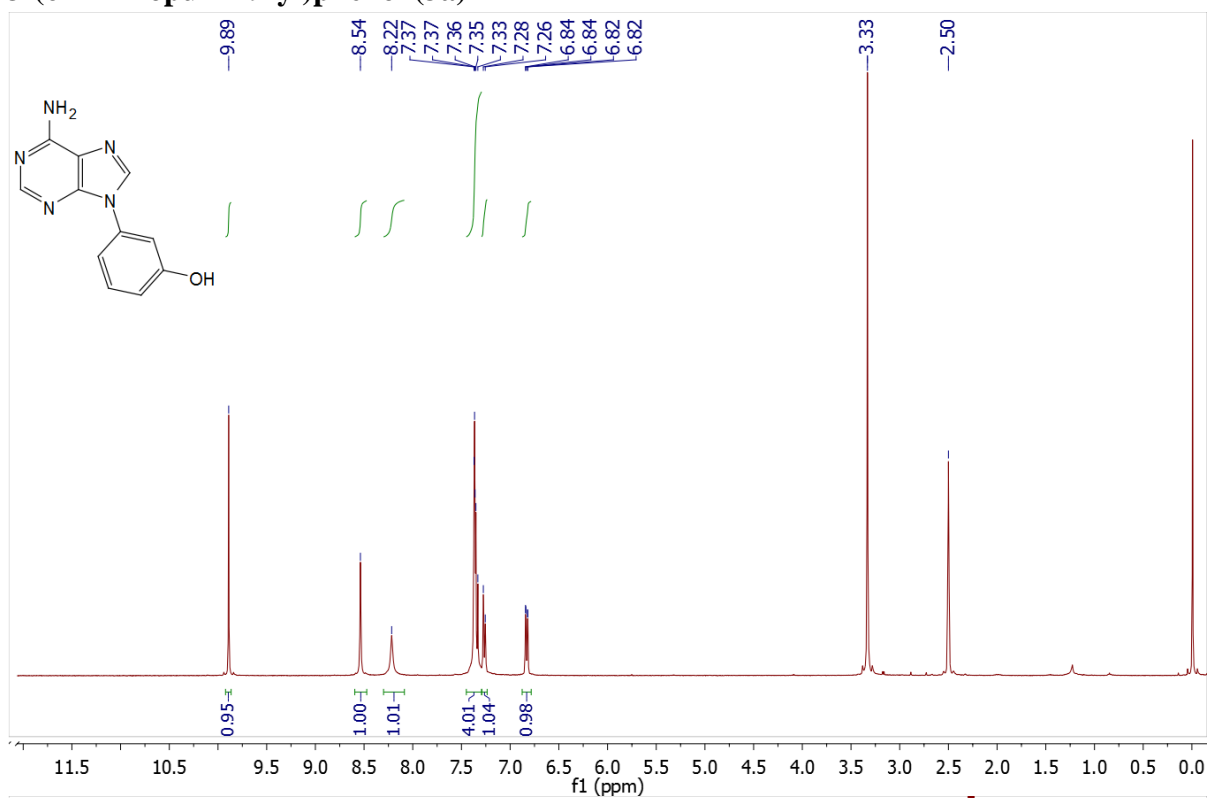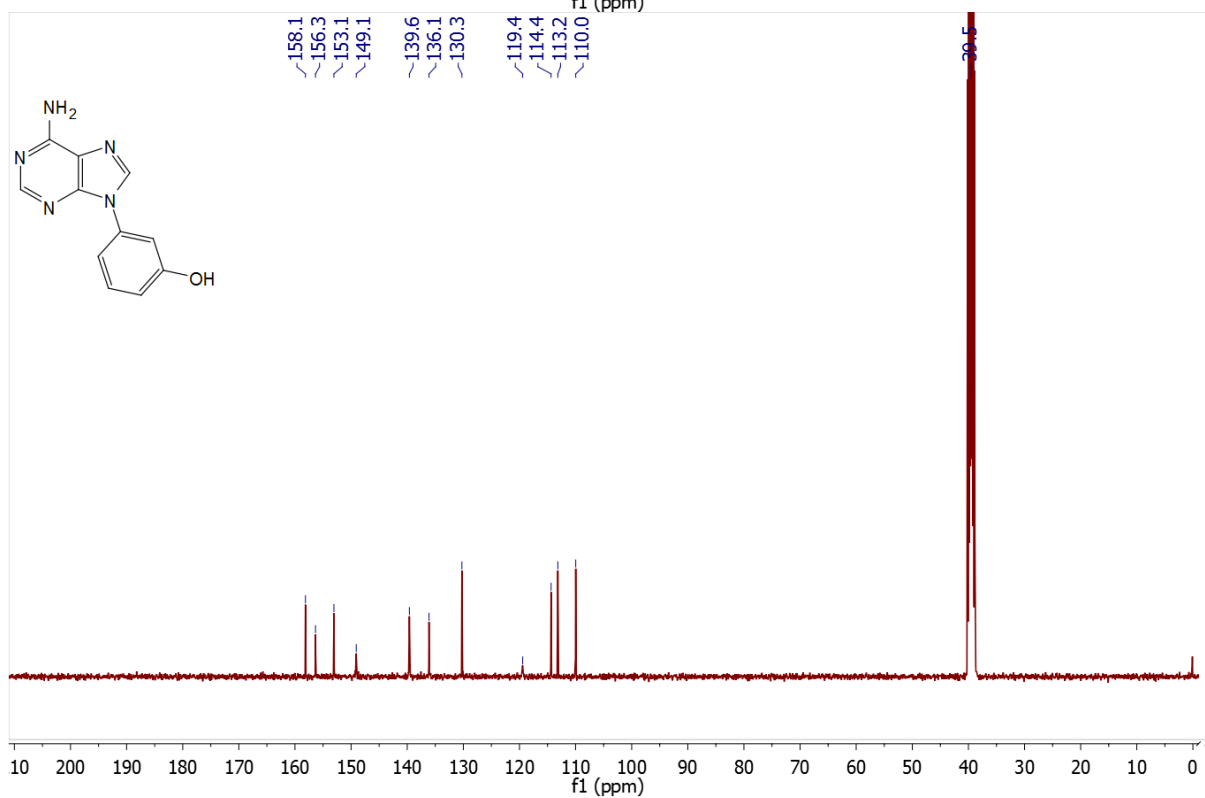

**9-(4-Aminophenyl)purin-6-amine (3b)**

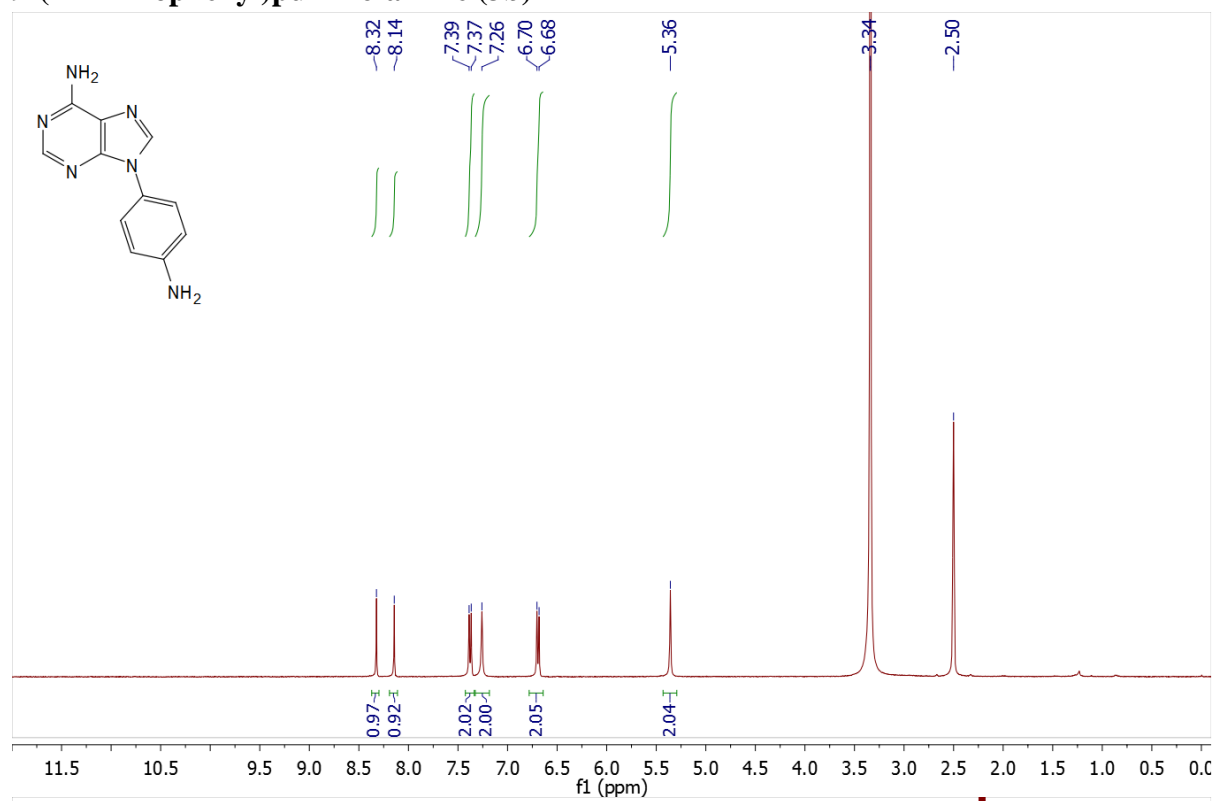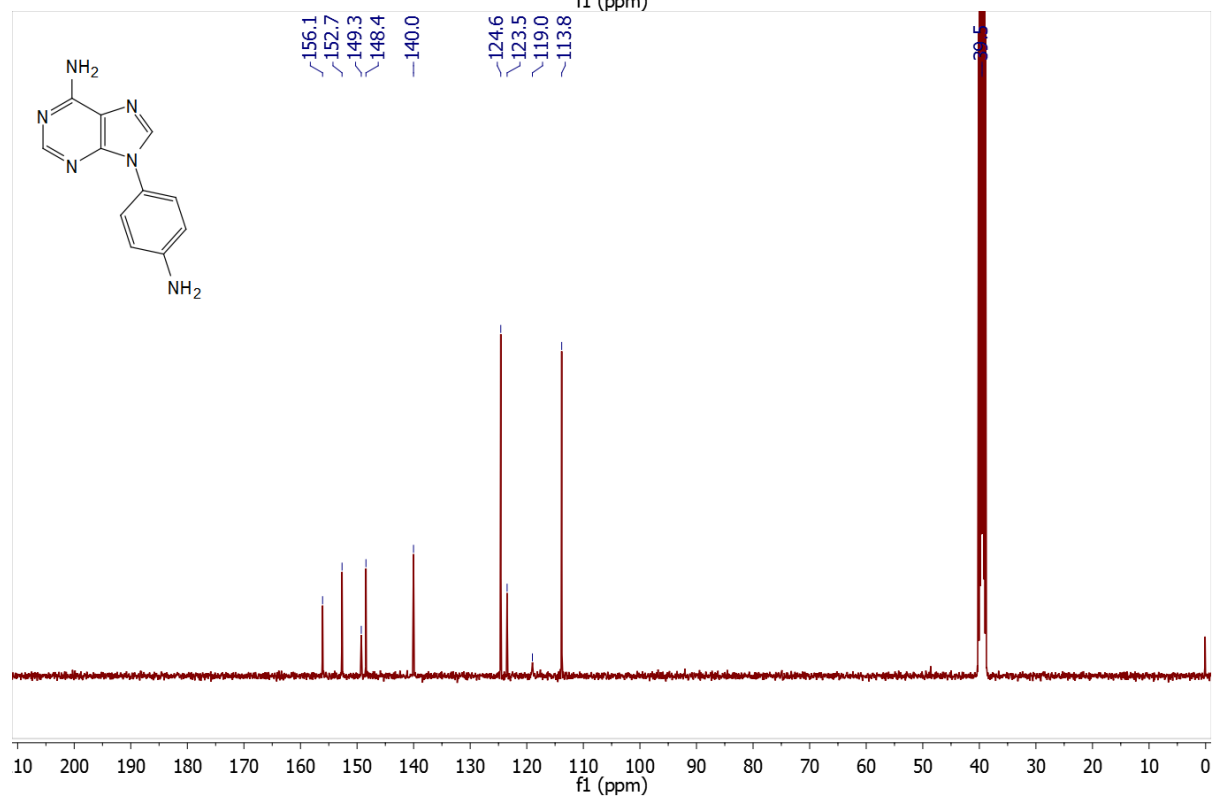

**3-(6-Aminopurin-9-yl)benzoic acid (3c)**

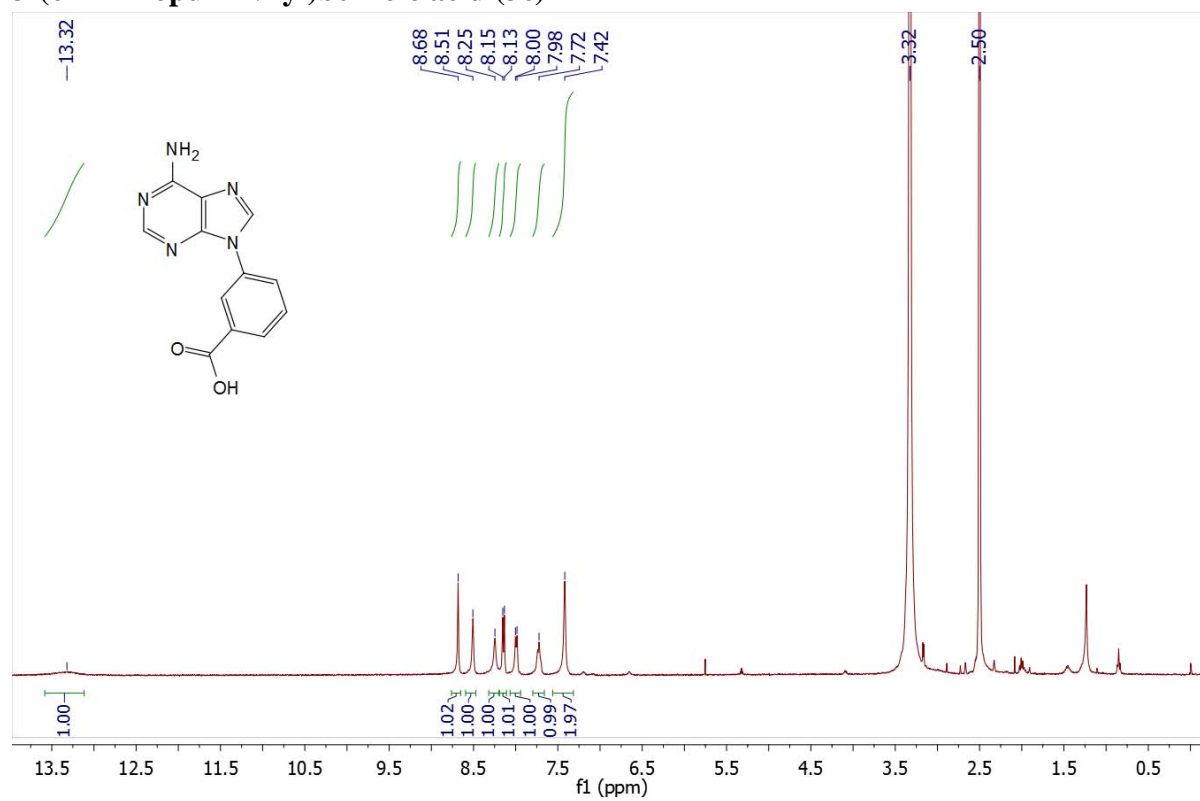

### 3-(6-Aminopurin-9-yl)benzonitrile (3d)

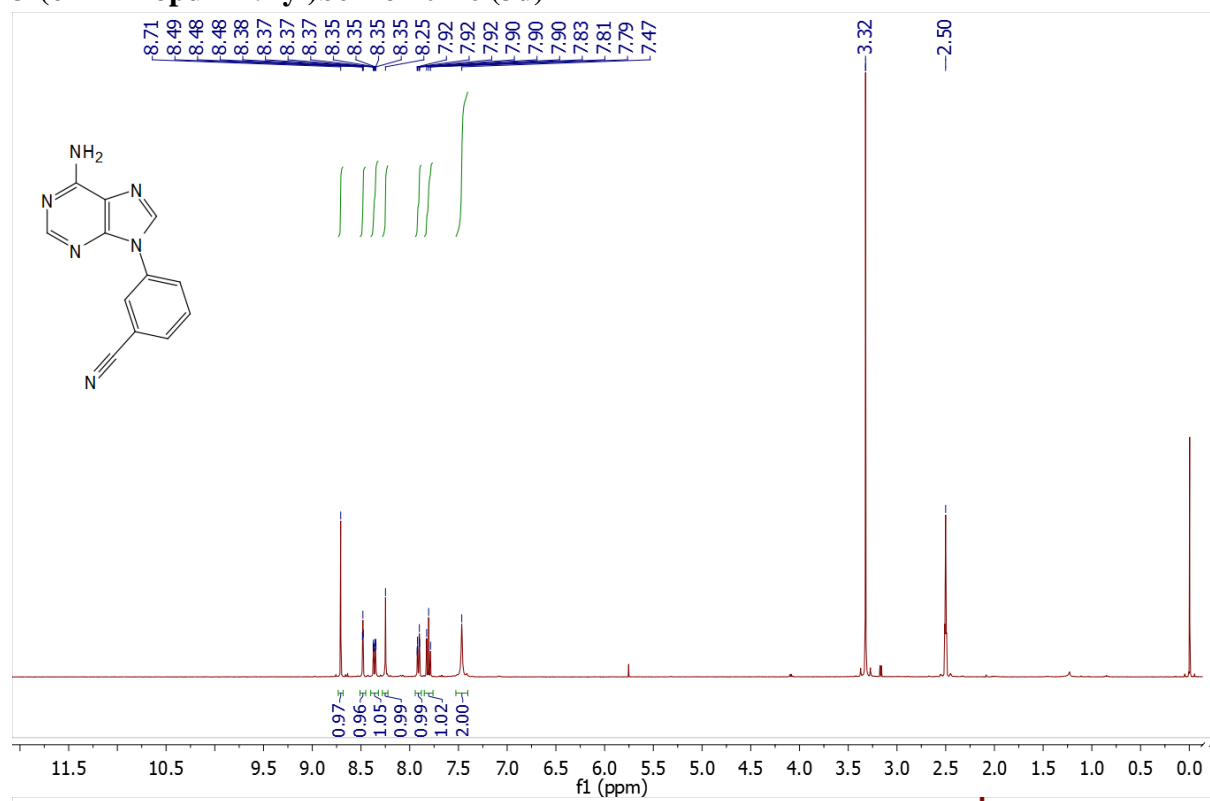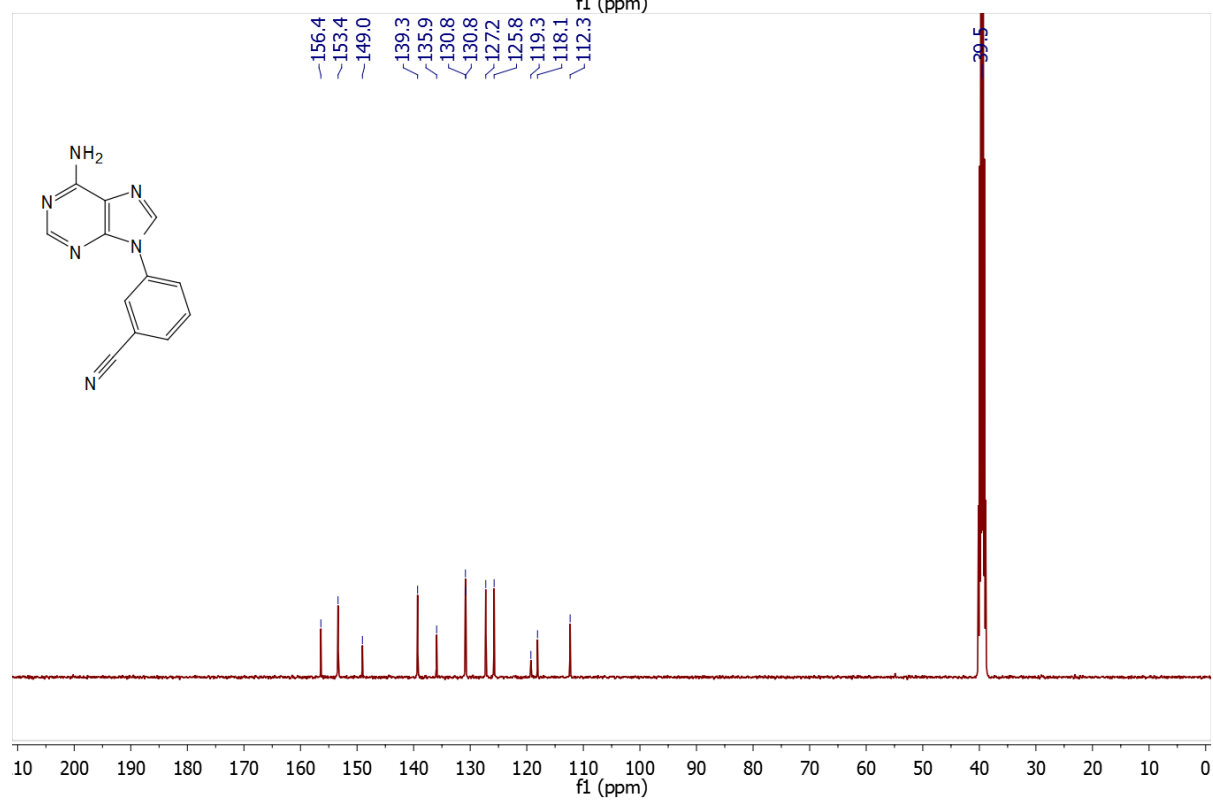

**9-(3-(Trifluoromethyl)phenyl)purin-6-amine (3e)**

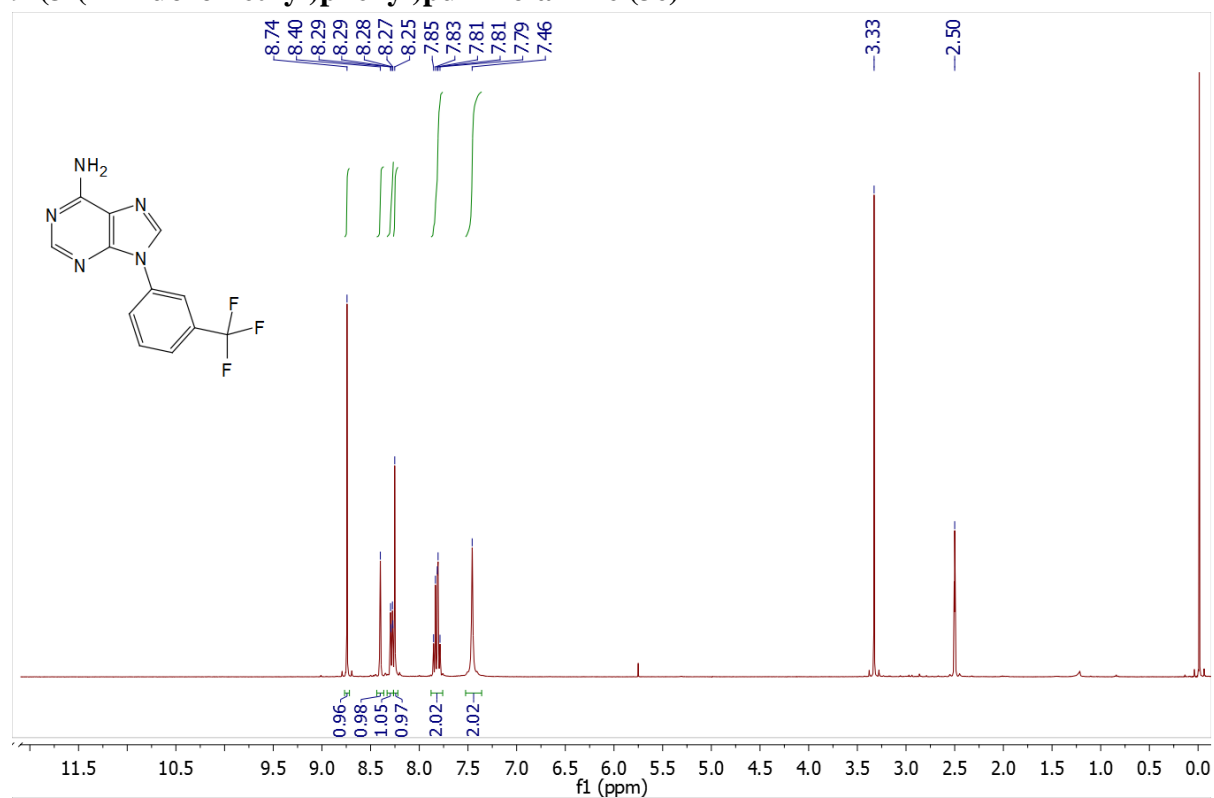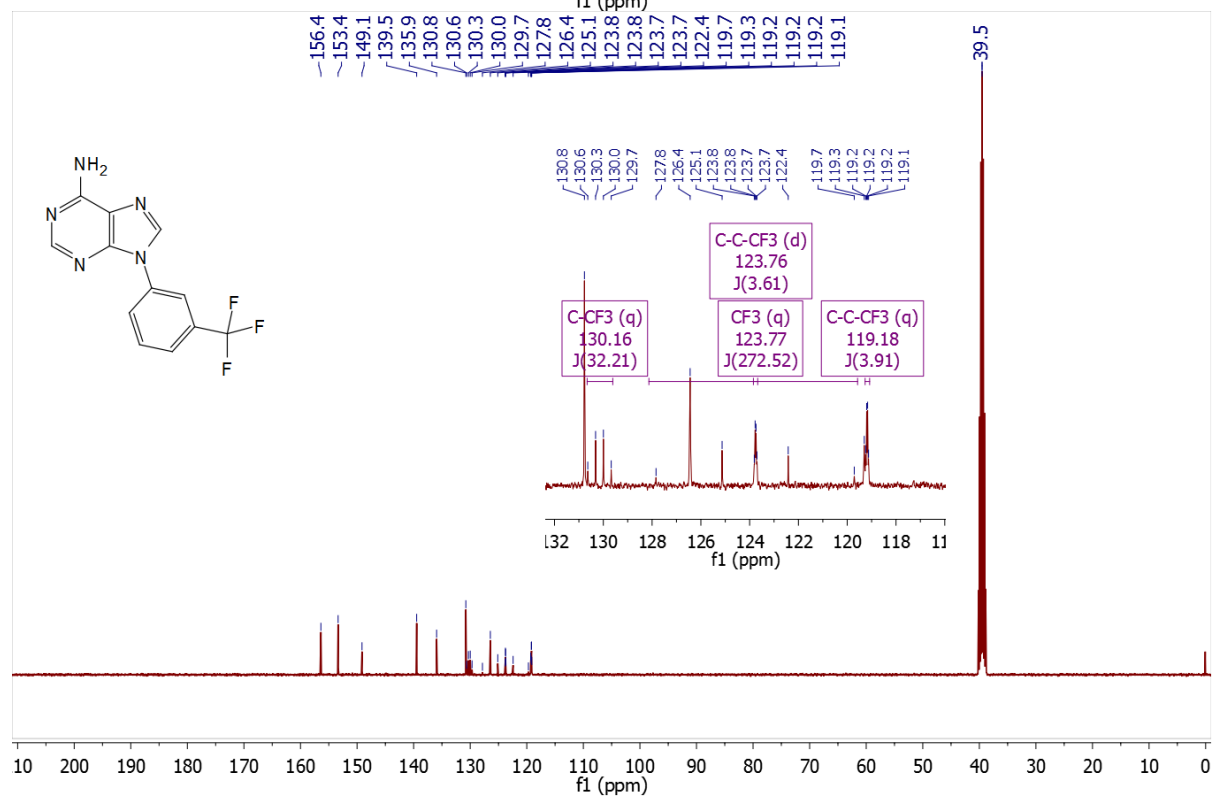

# **9-(3-Nitrophenyl)purin-6-amine (3f)**

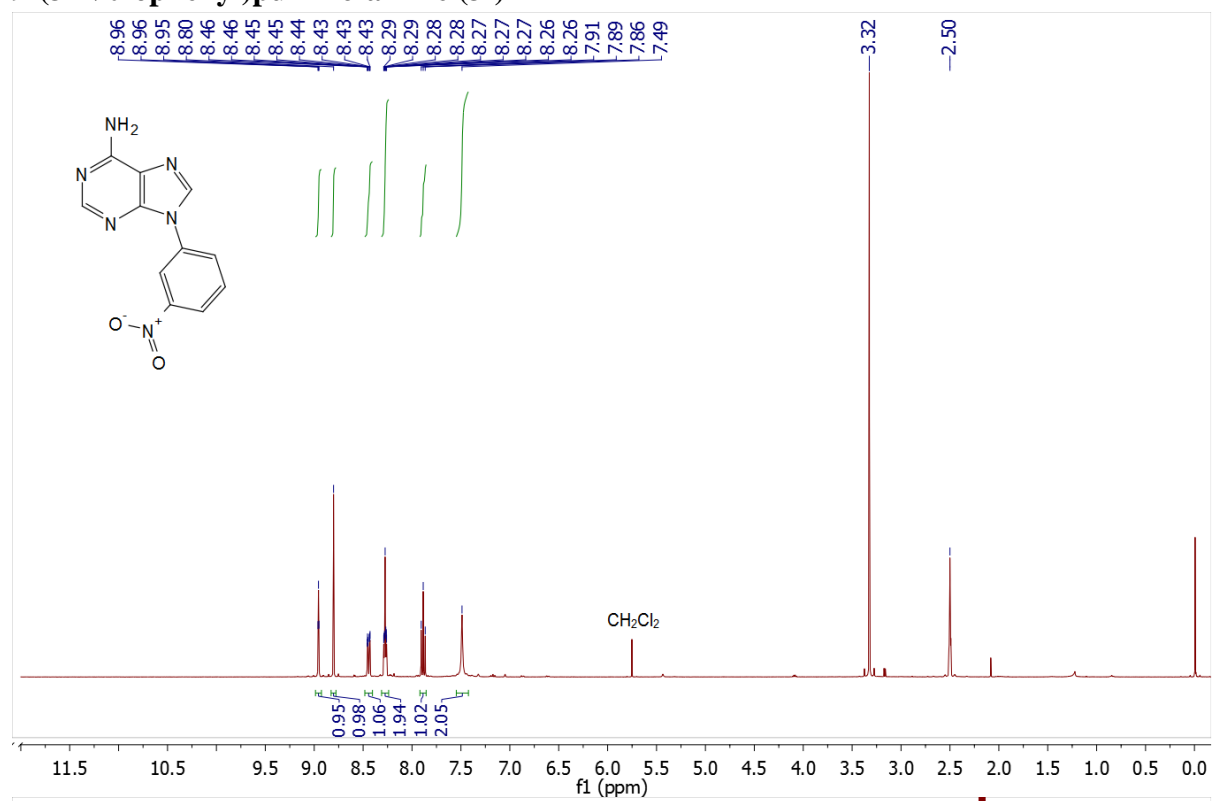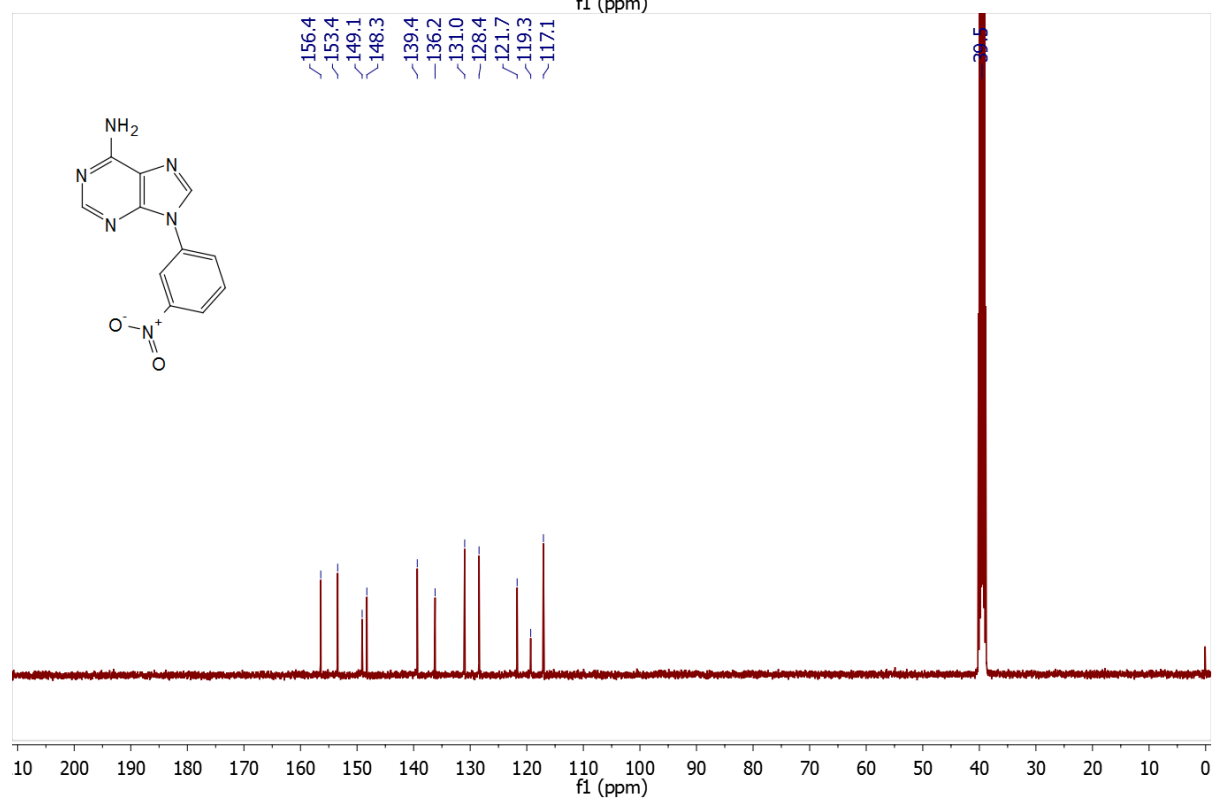

**9-(2-Chlorophenyl)purin-6-amine (3g)**

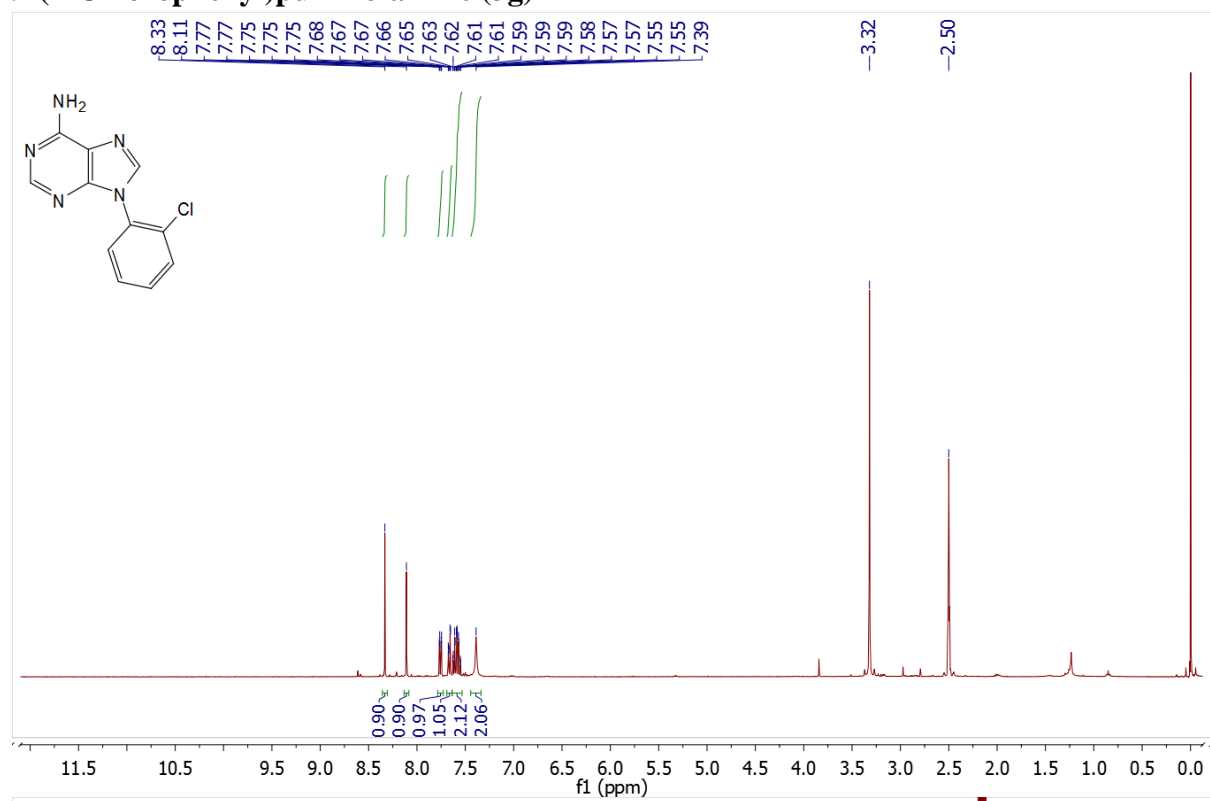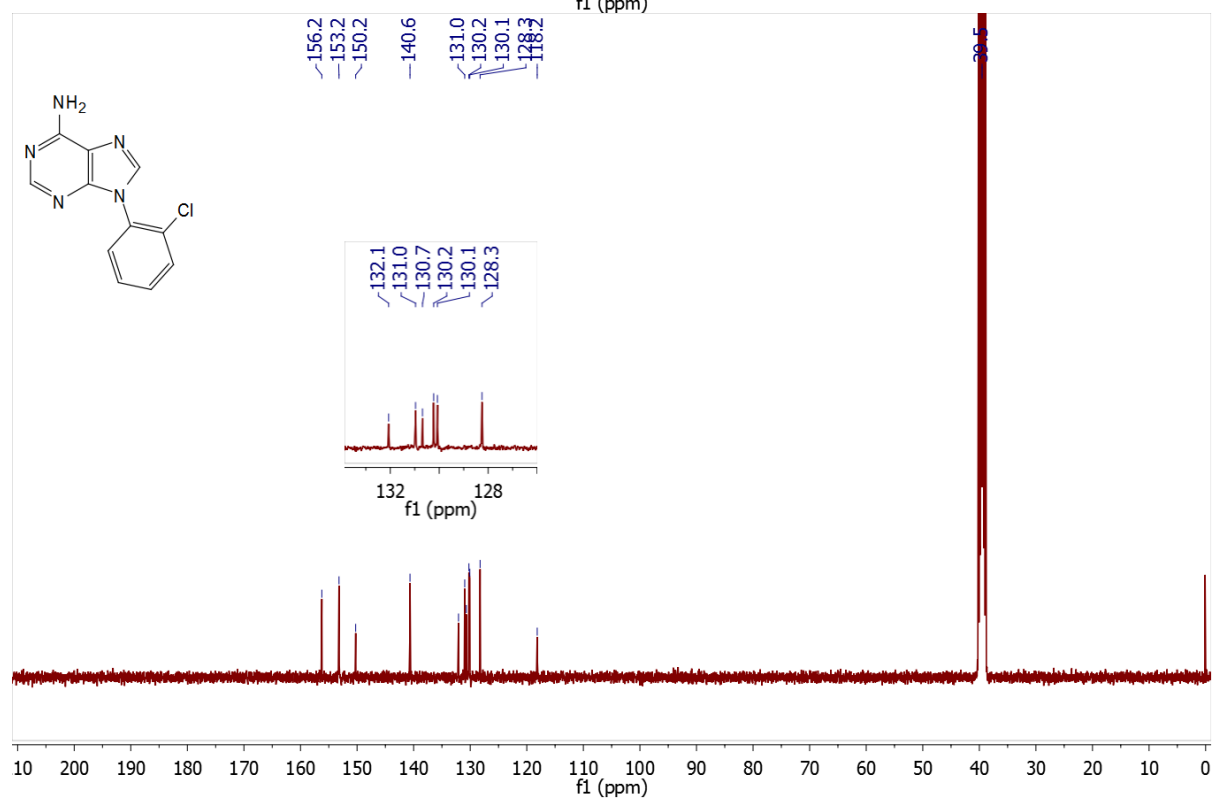



**9-(*o*-Tolyl)purin-6-amine (3h)**

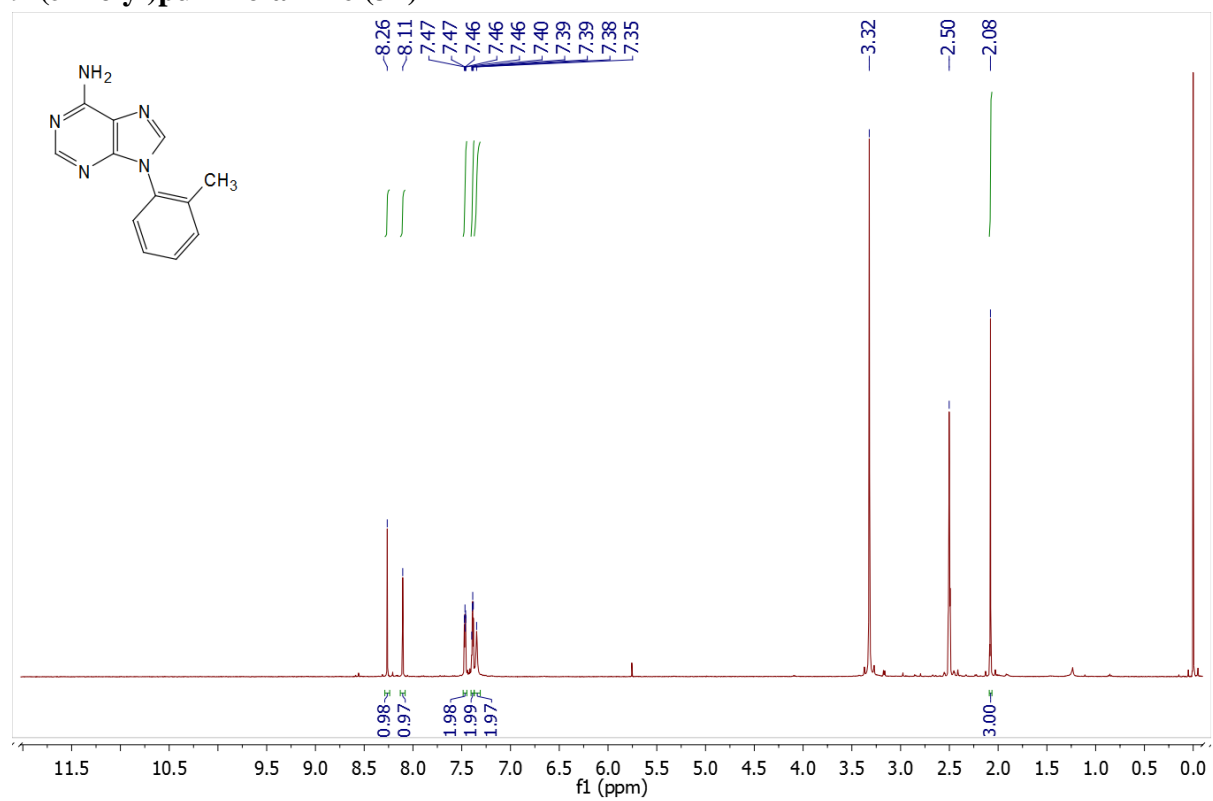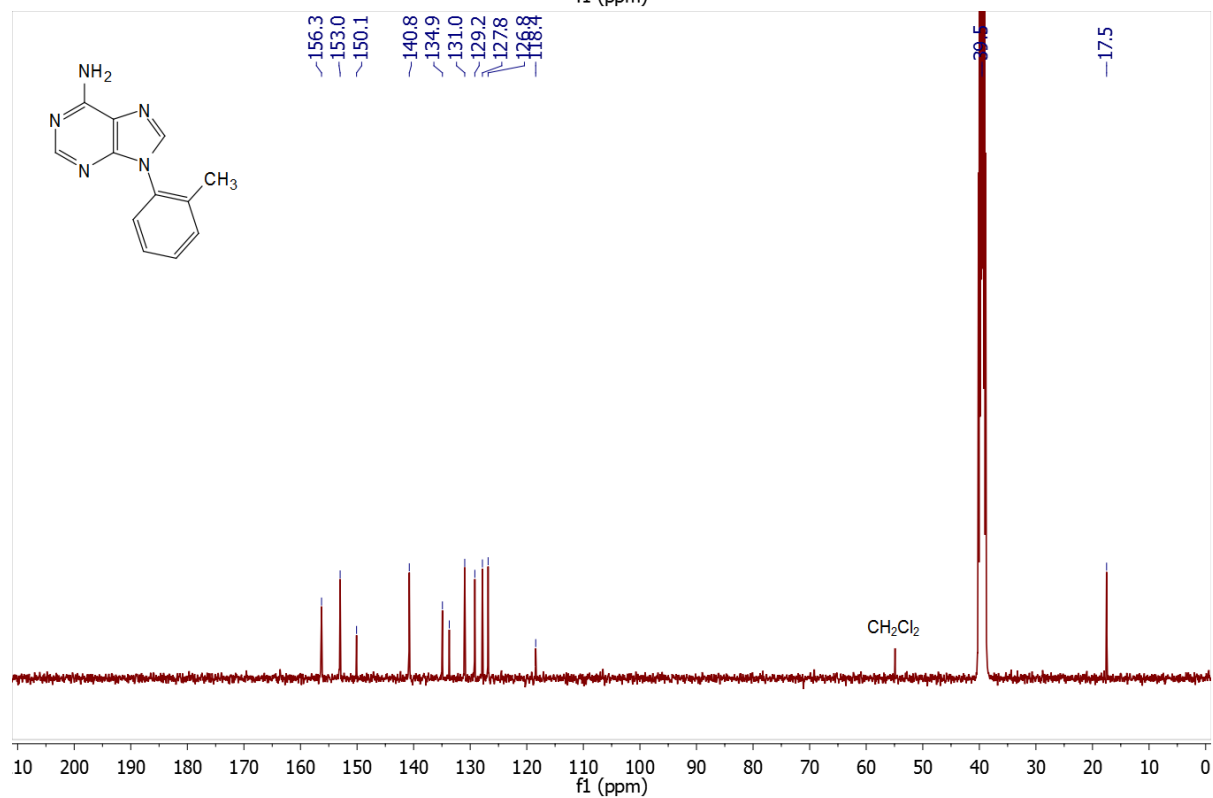

**9-(Pyridin-2-yl)purin-6-amine (3i)**

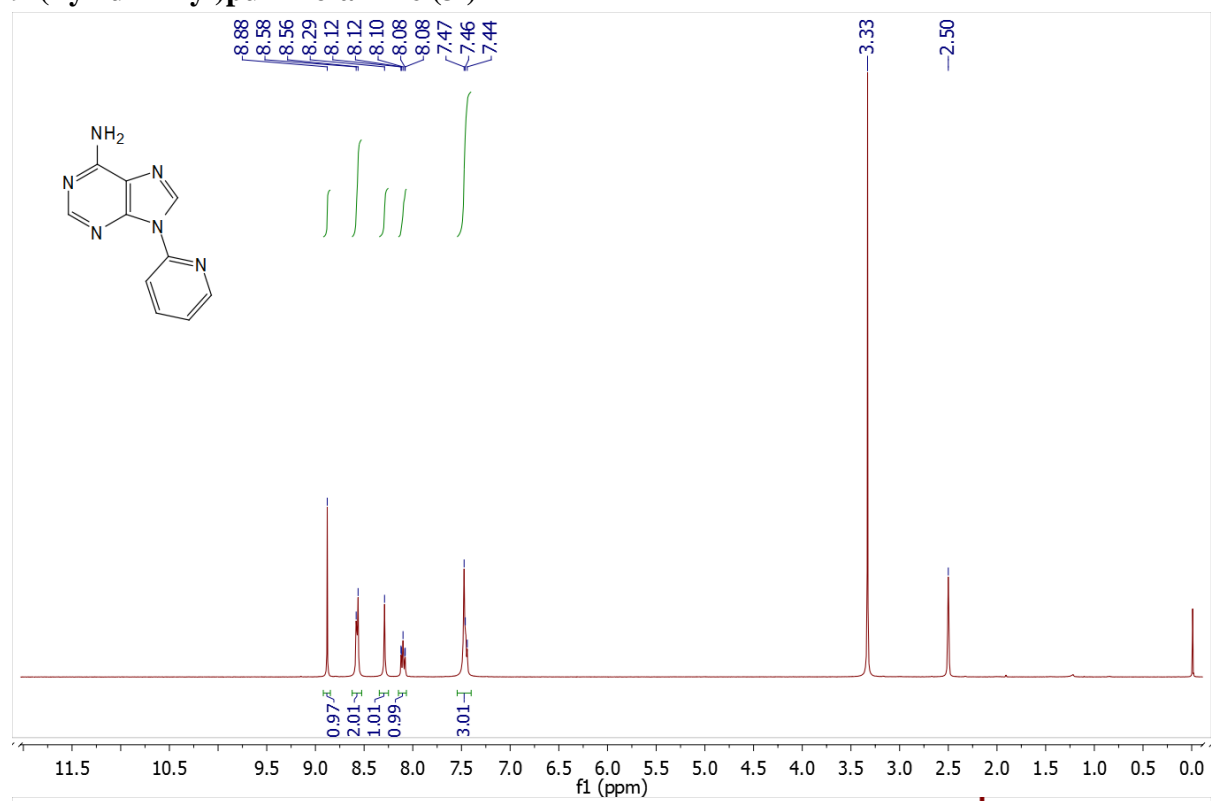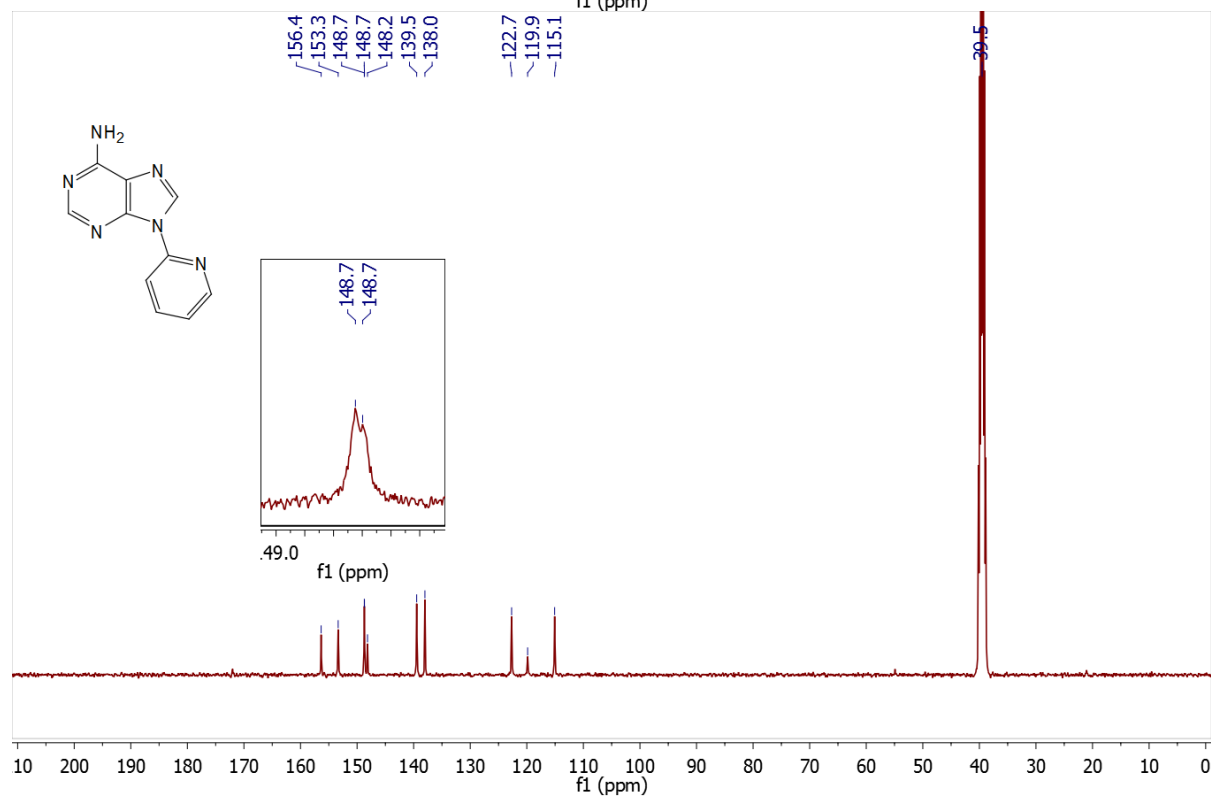

**9-(6-Methylpyridin-3-yl)purin-6-amine (3j)**

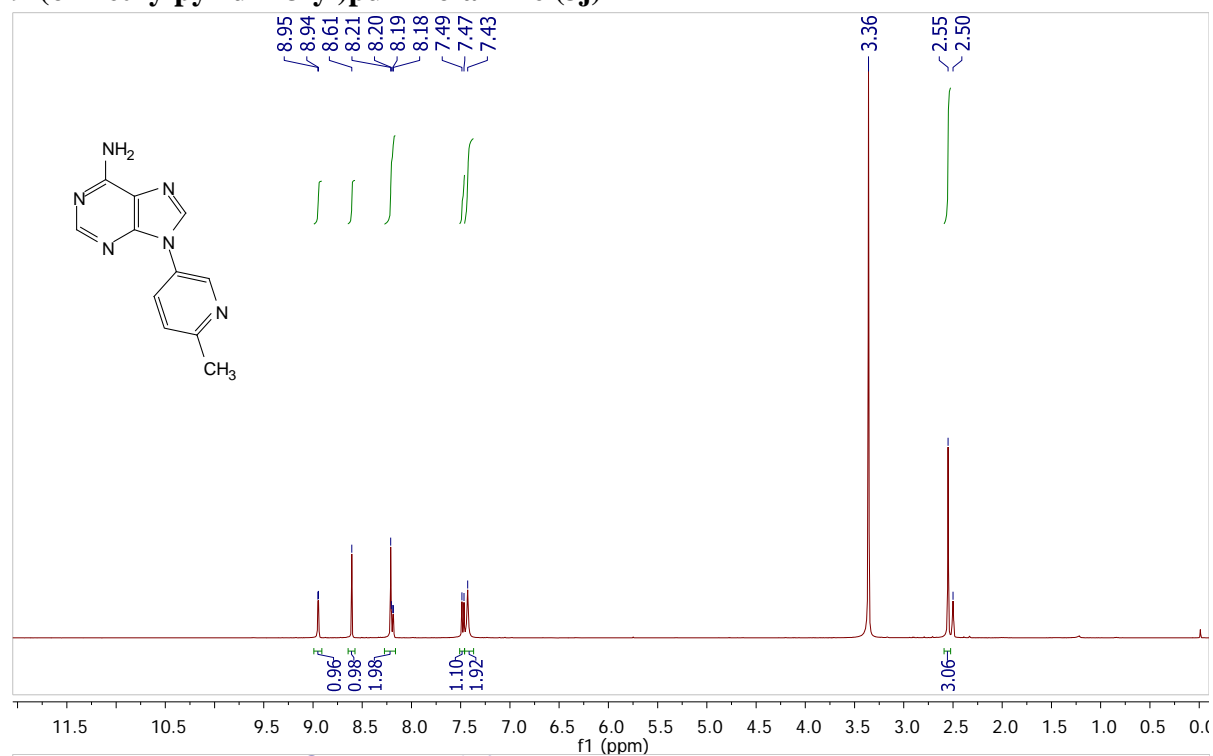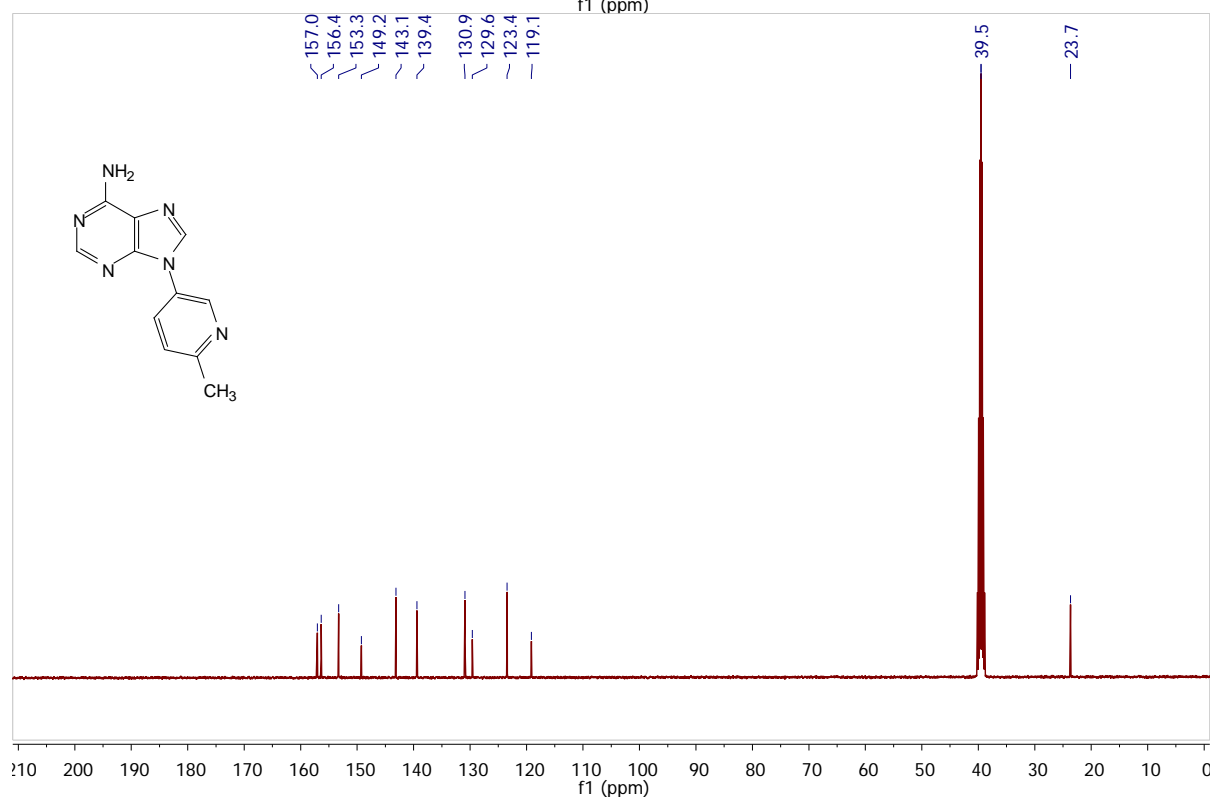

**9-(Thiophen-3-yl)purin-6-amine (3k)**

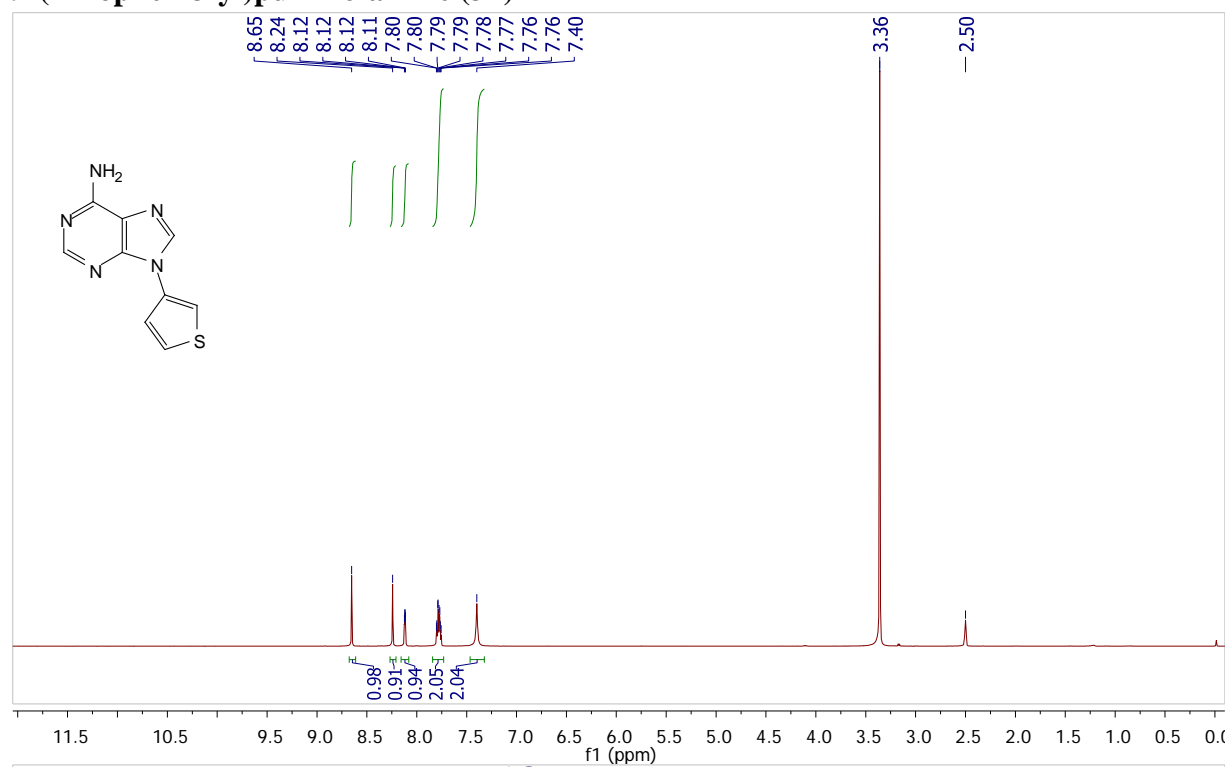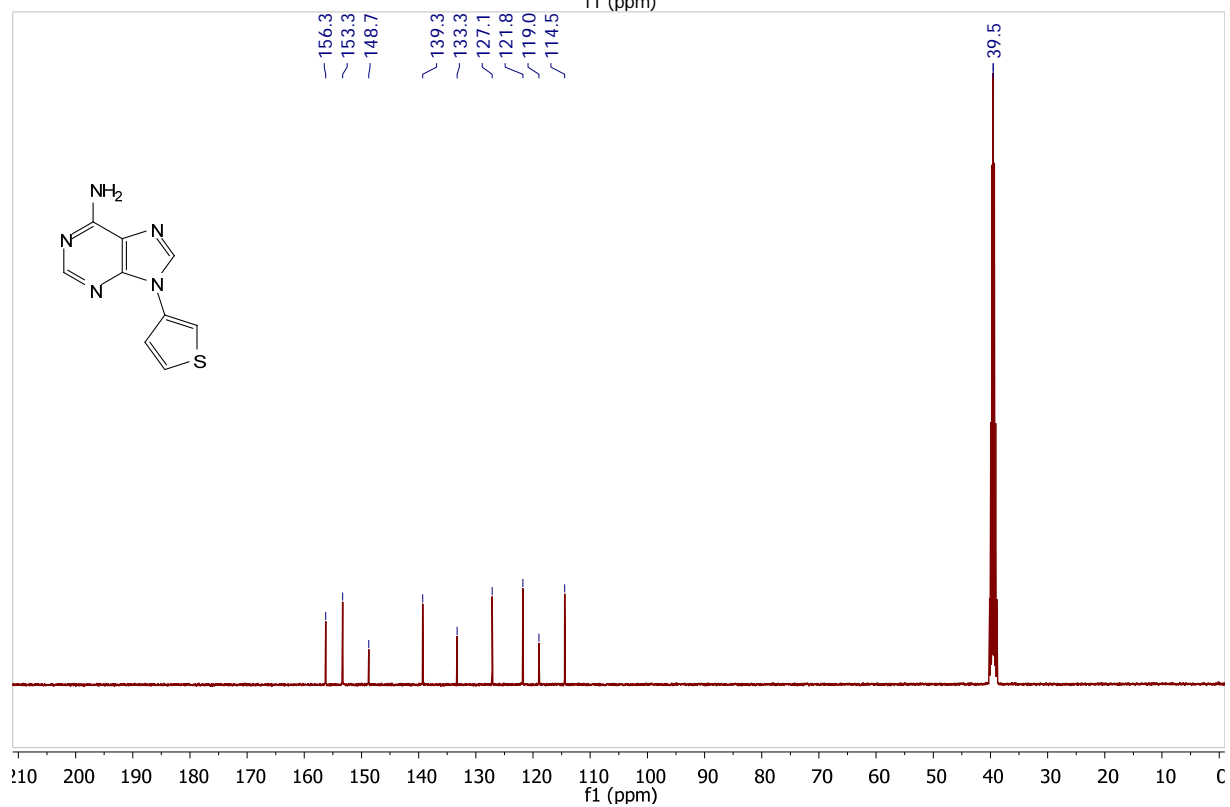

# **4-(6-Aminopurin-9-yl)phenol (3l)**

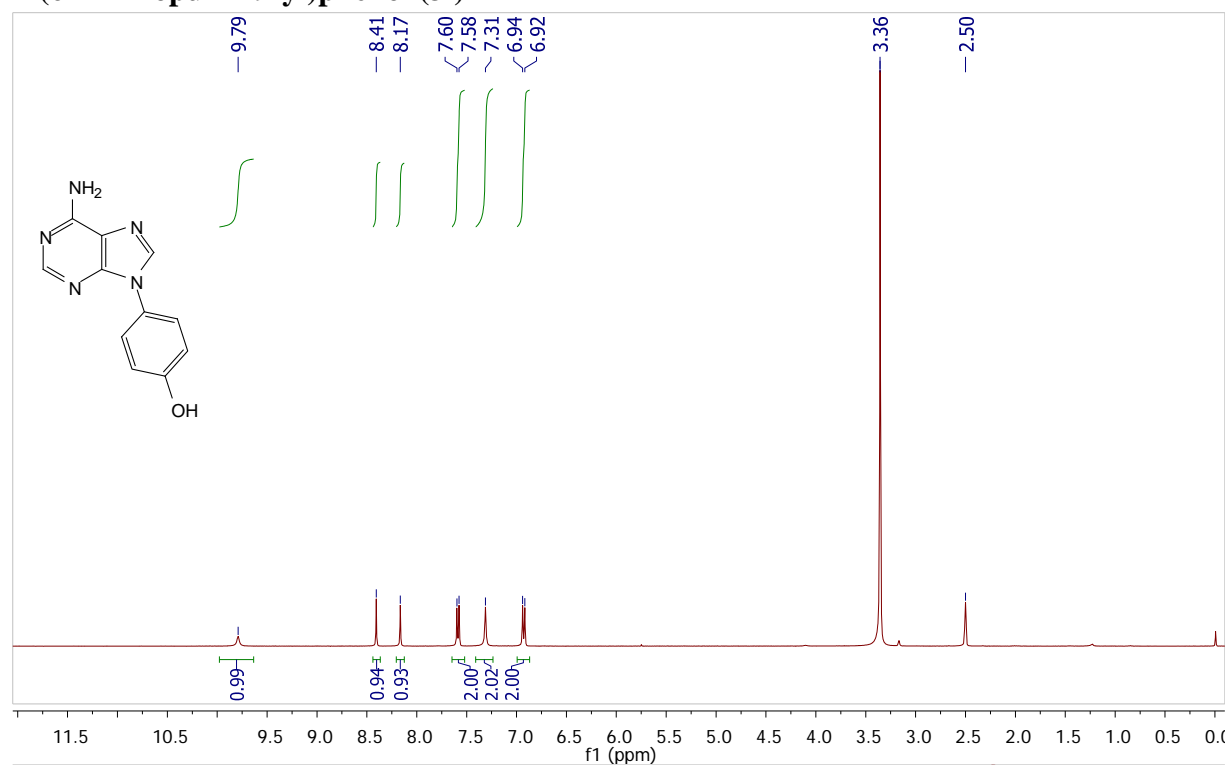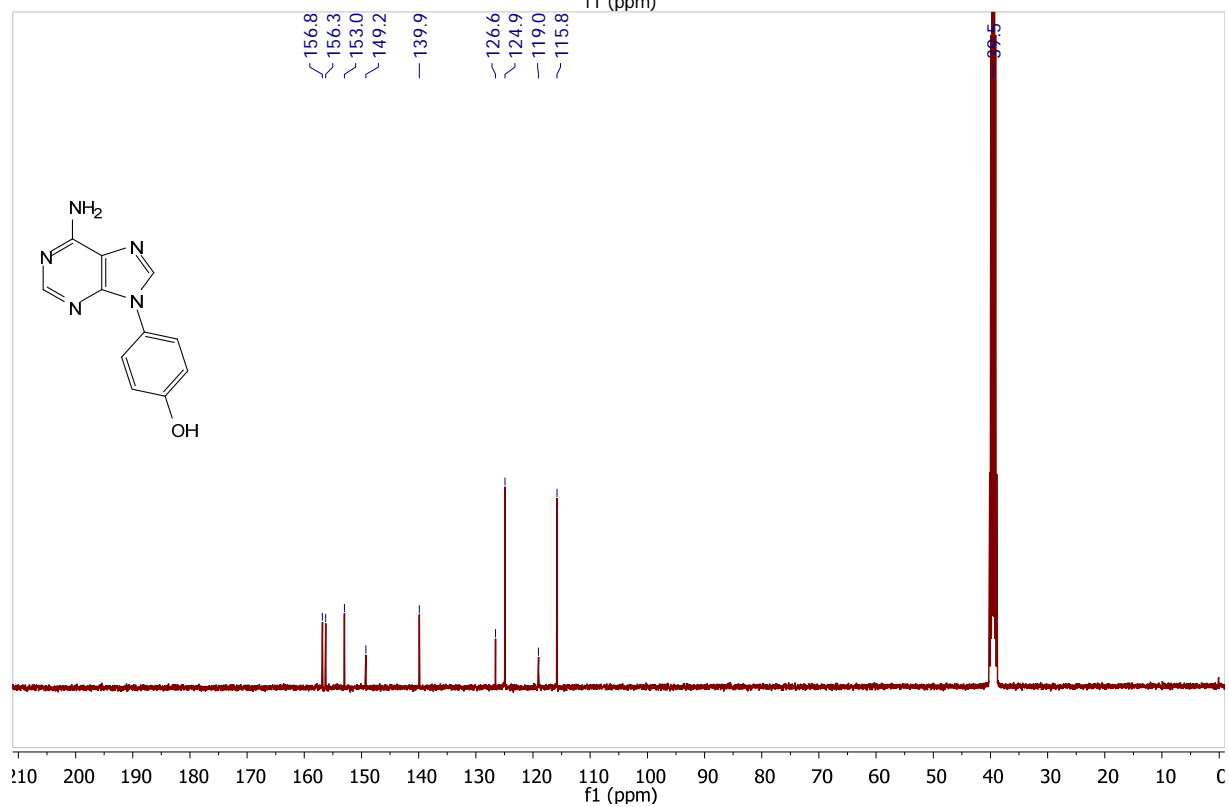

**1-(4-(6-Aminopurin-9-yl)phenyl)ethan-1-one (3m)**

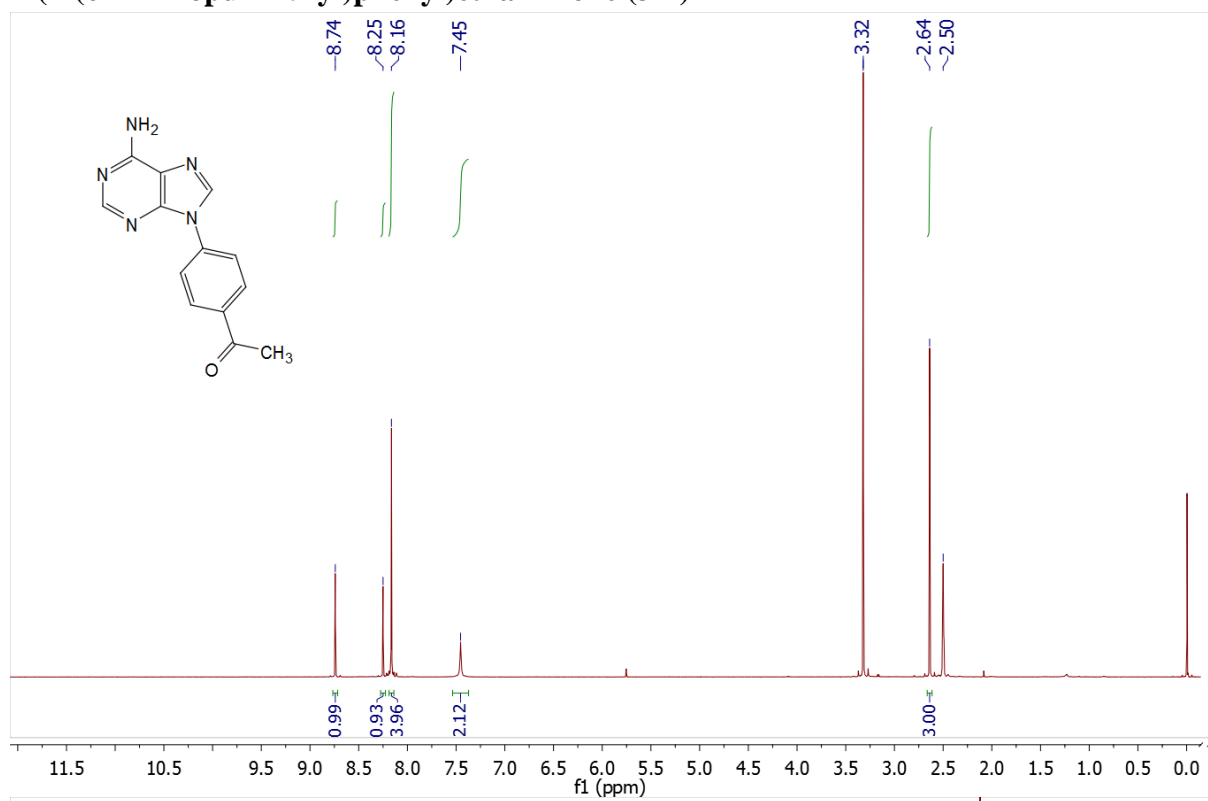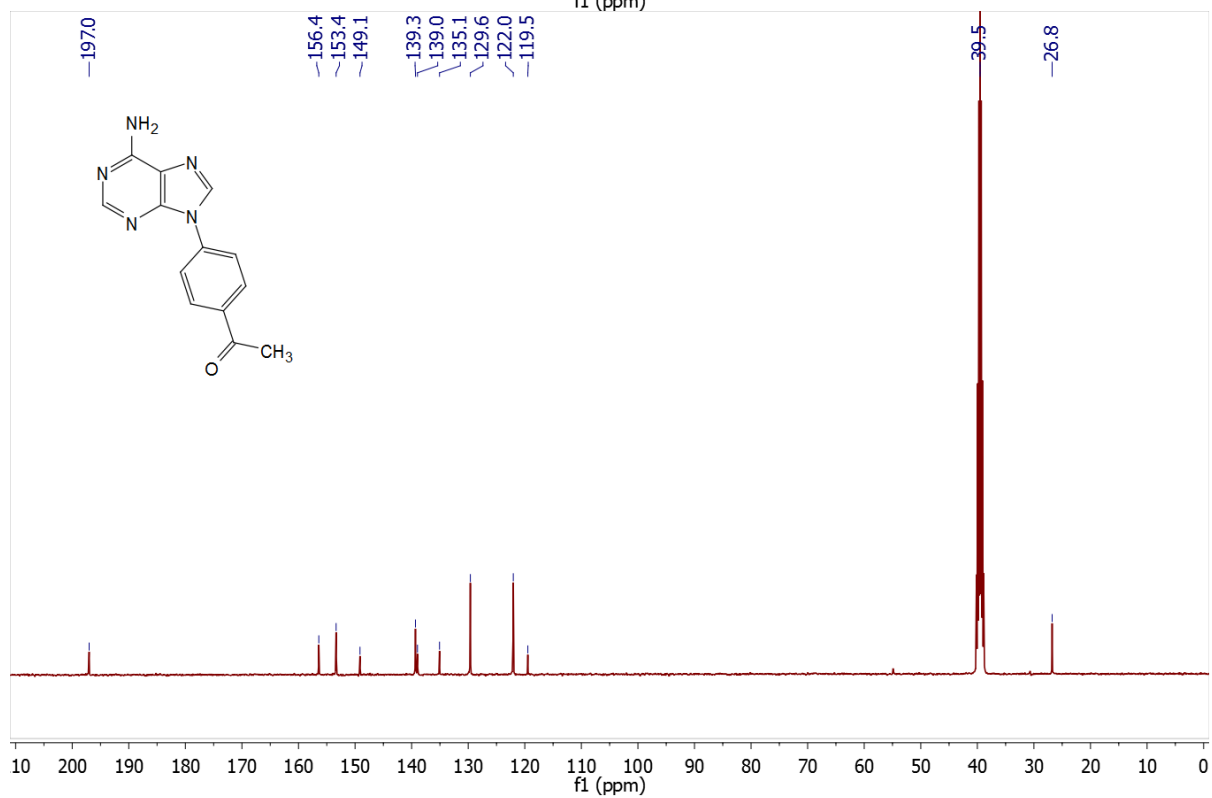

**9-(4-Fluorophenyl)purin-6-amine (3n)**

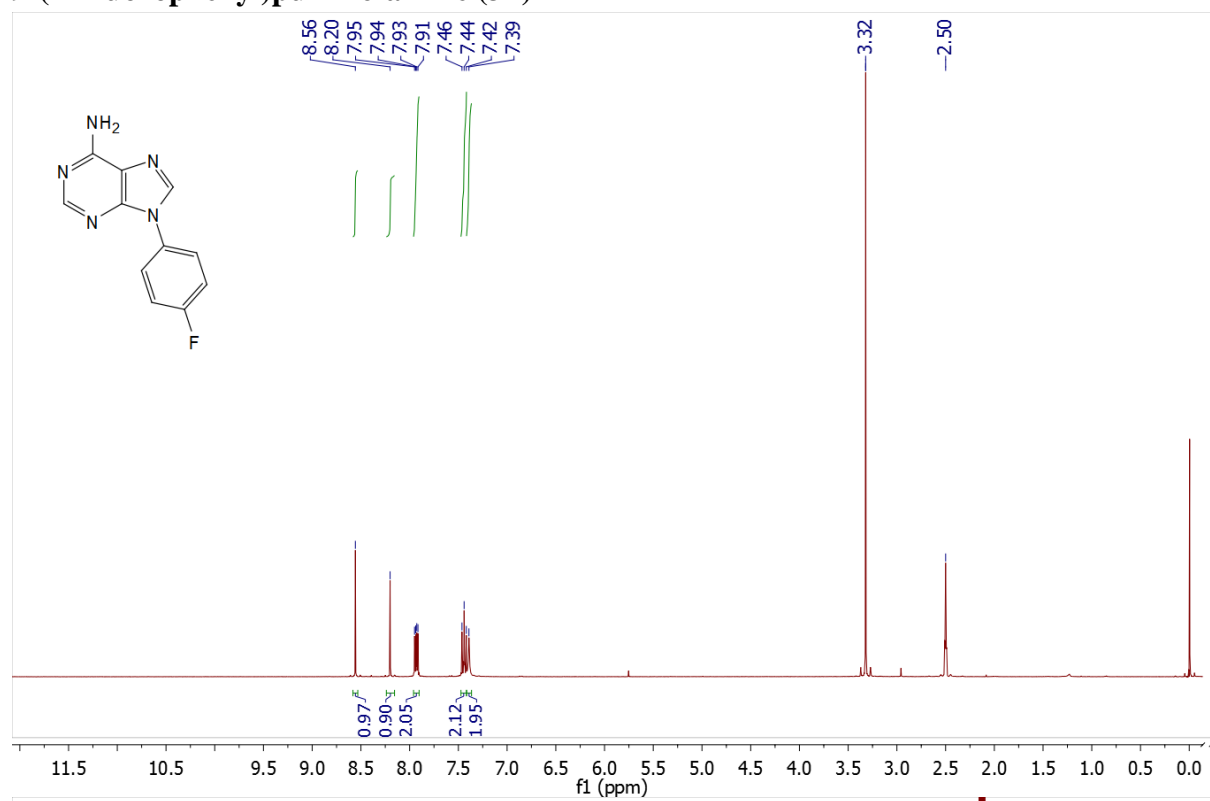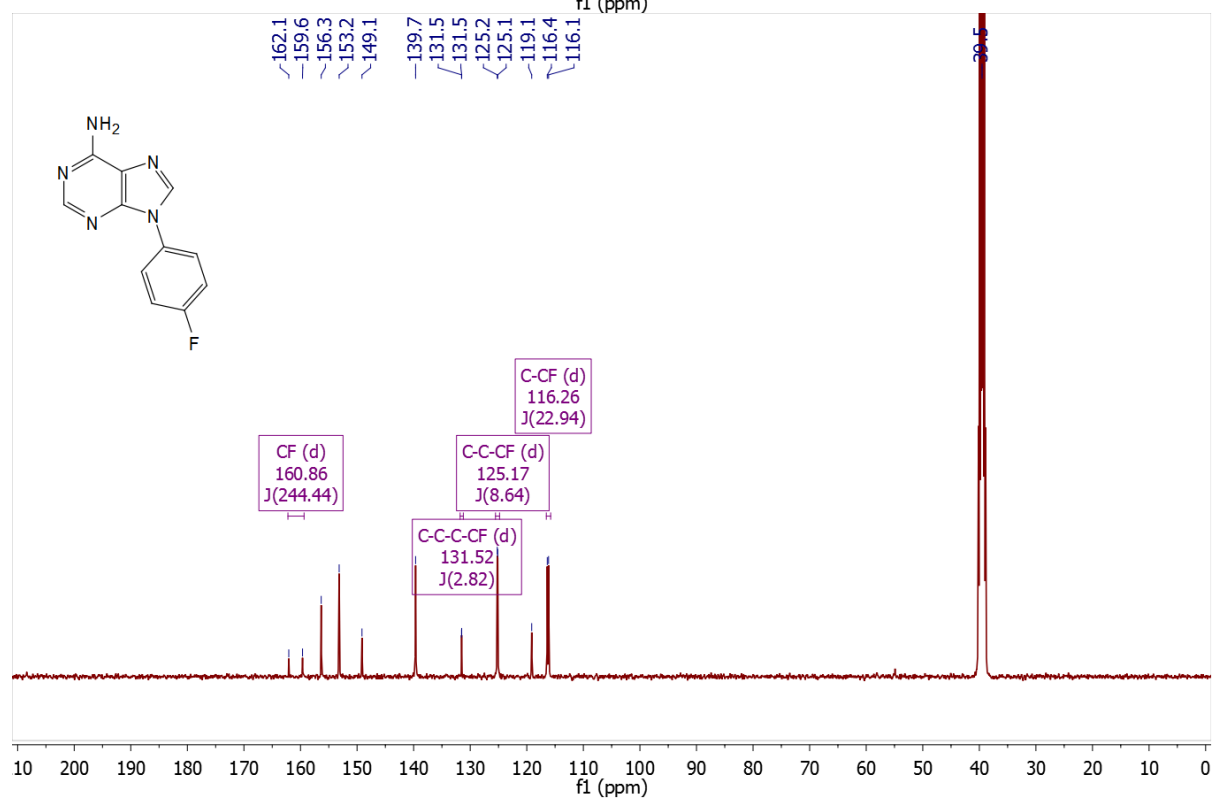

**2-(4-(6-Aminopurin-9-yl)phenyl)ethan-1-ol (3o)**

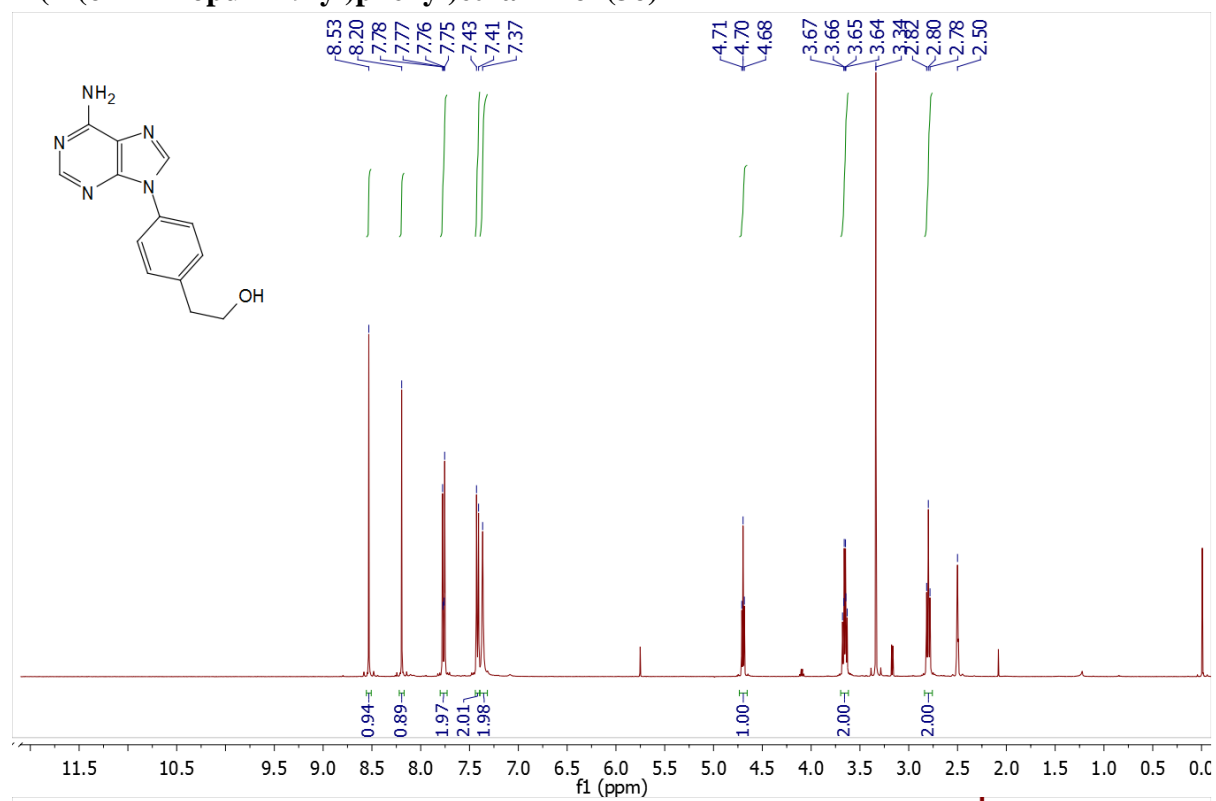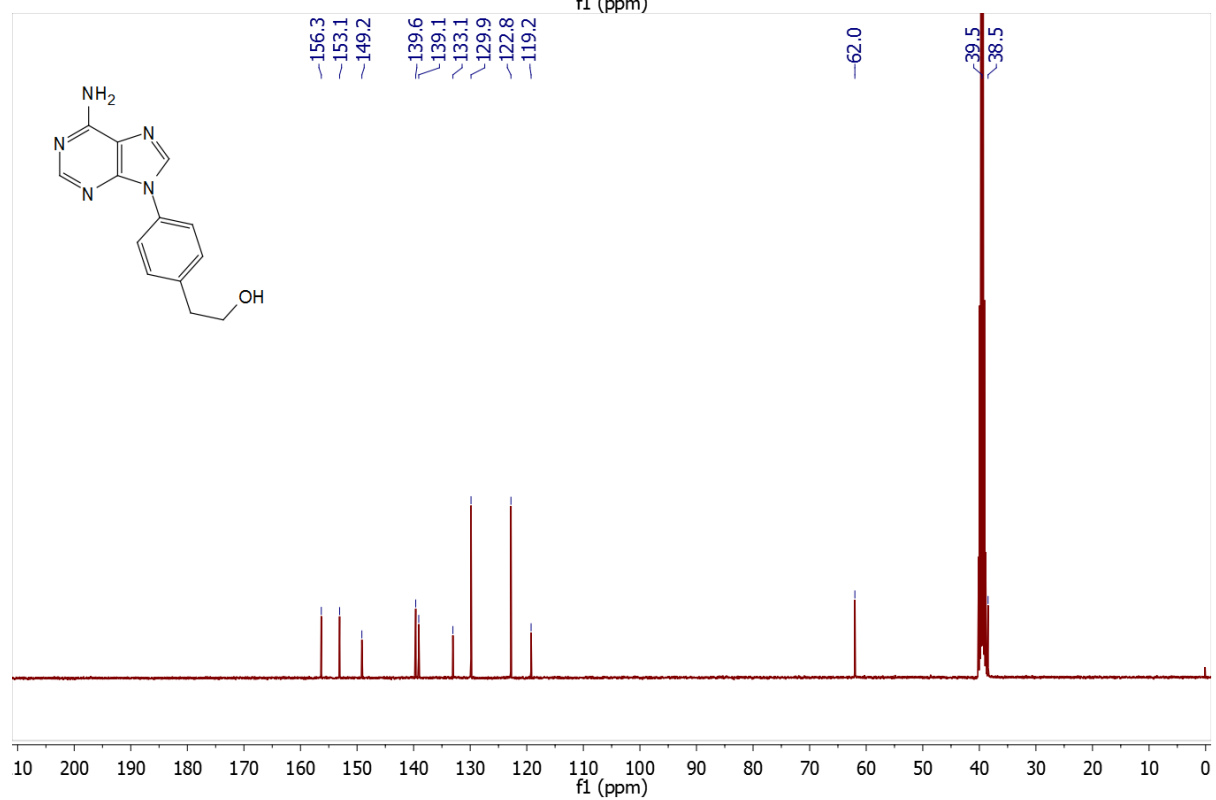



**9-(4-(2-Aminoethyl)phenyl)purin-6-amine (3p)**

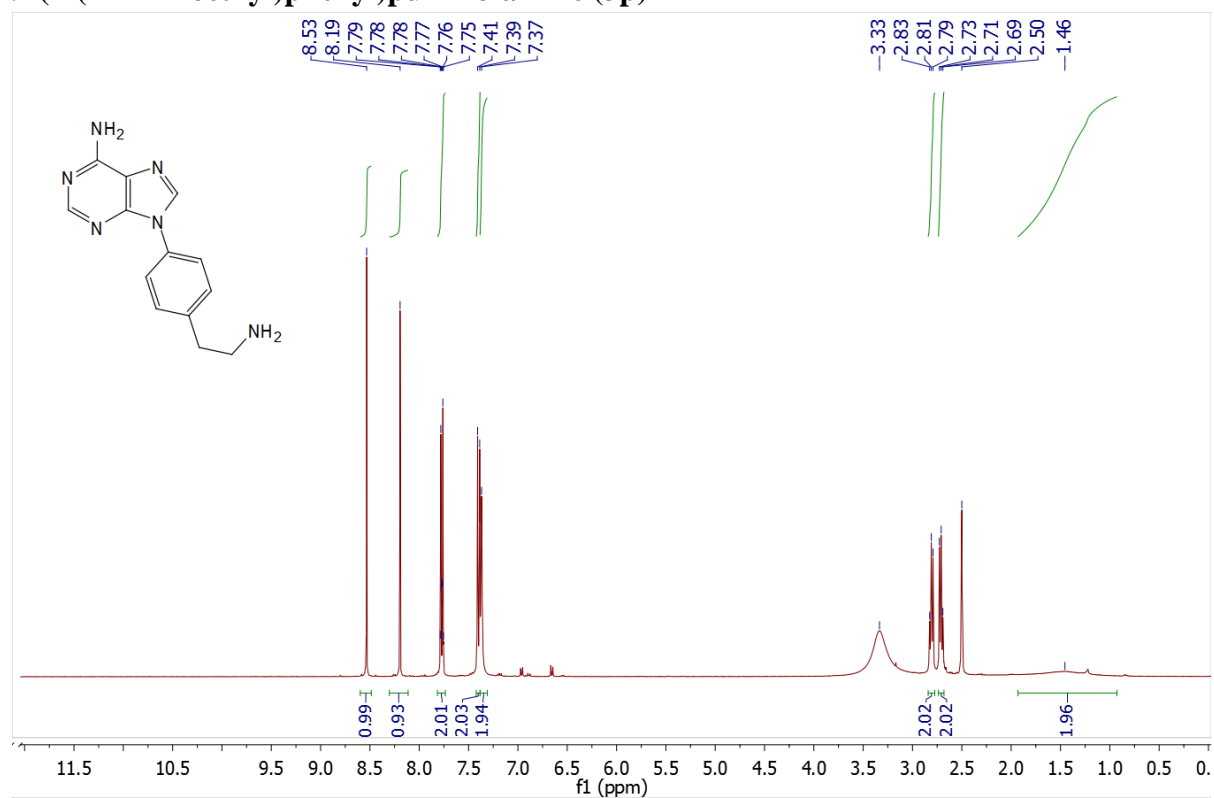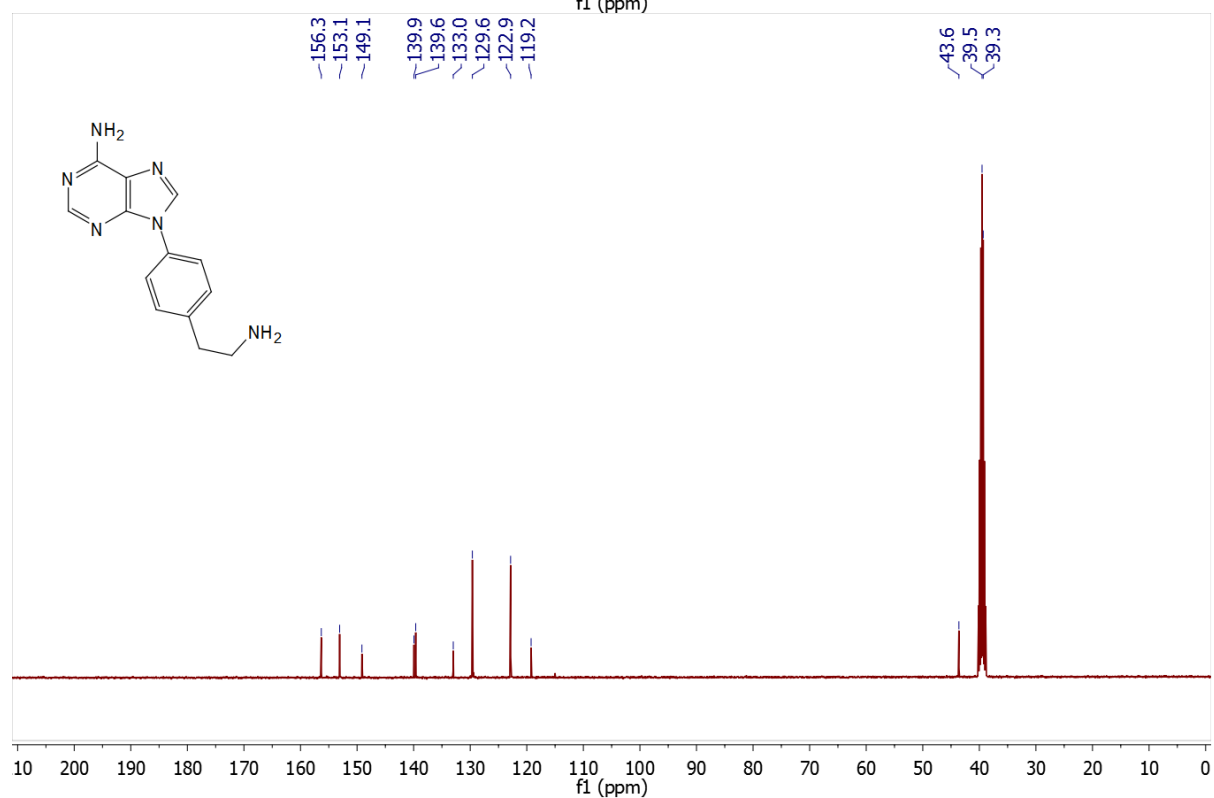

HSQC of **3p**:

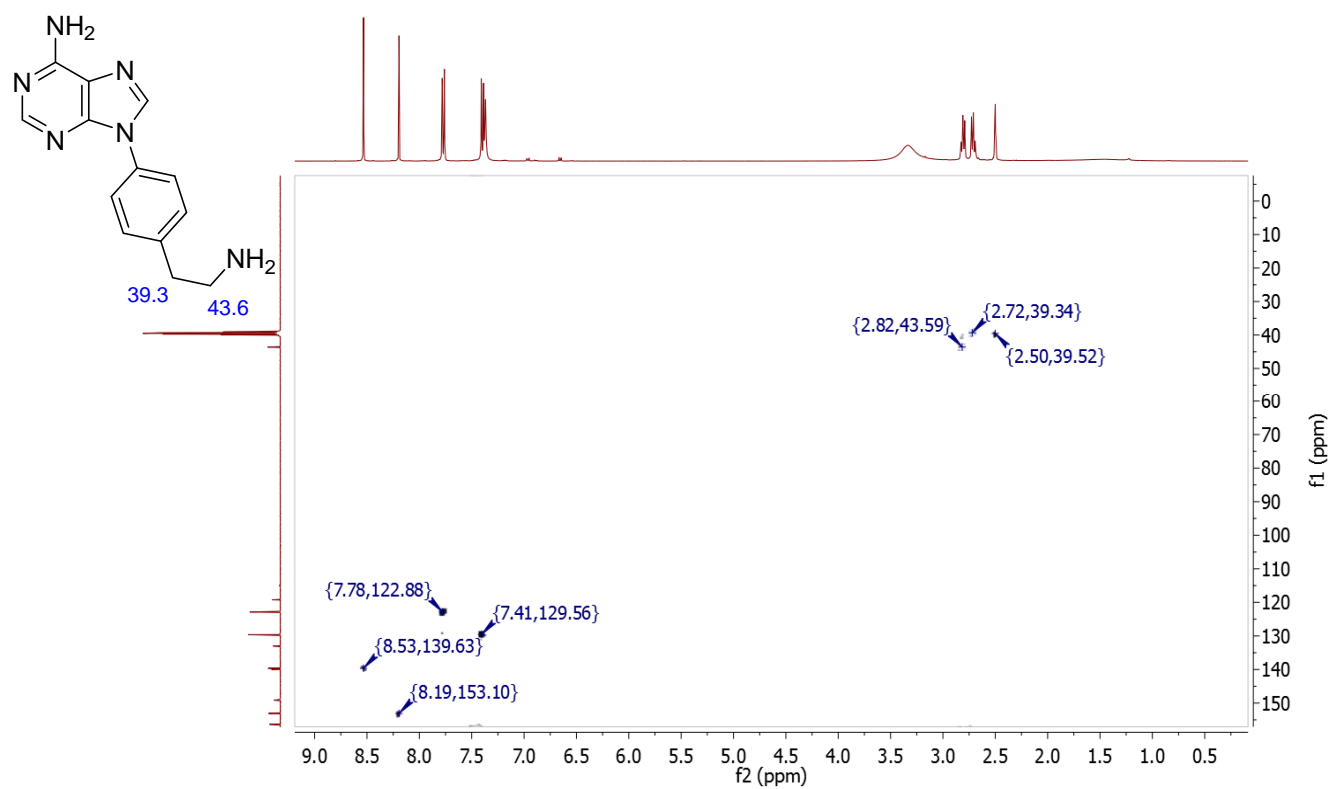

***N*-(4-(6-Aminopurin-9-yl)phenethyl)formamide**

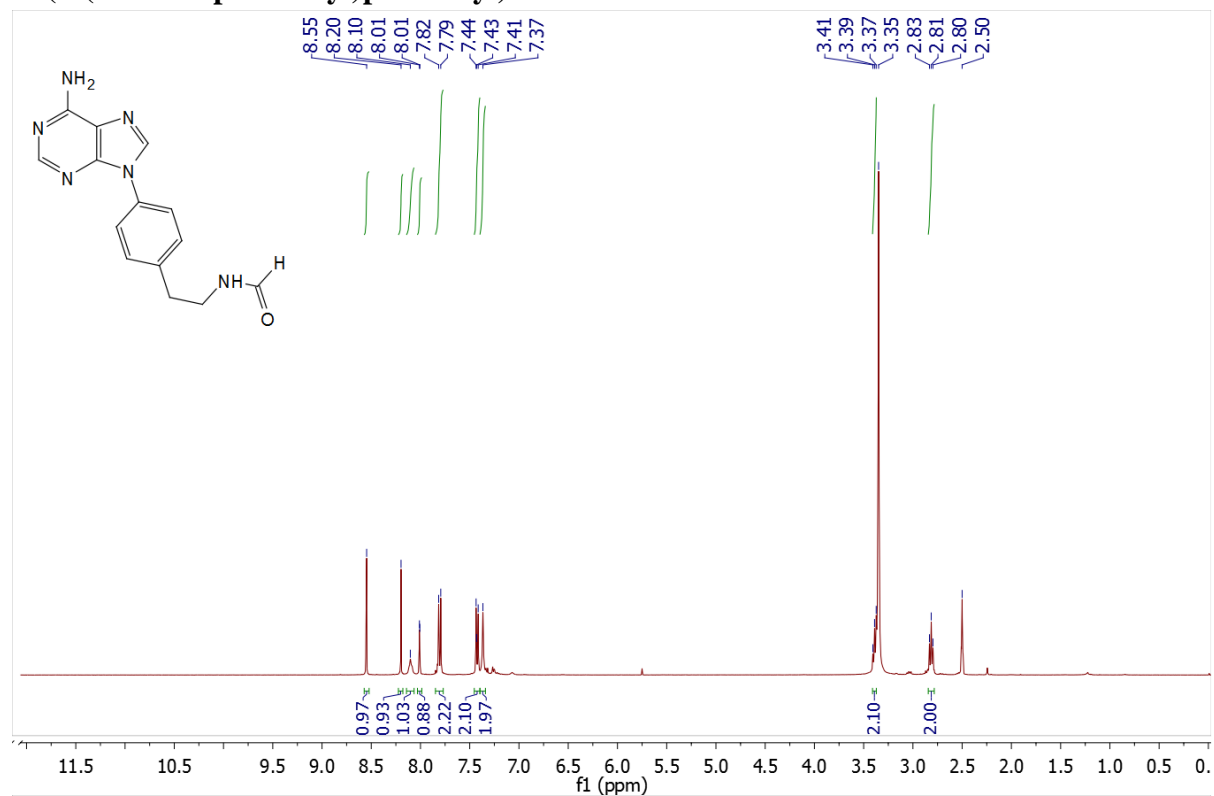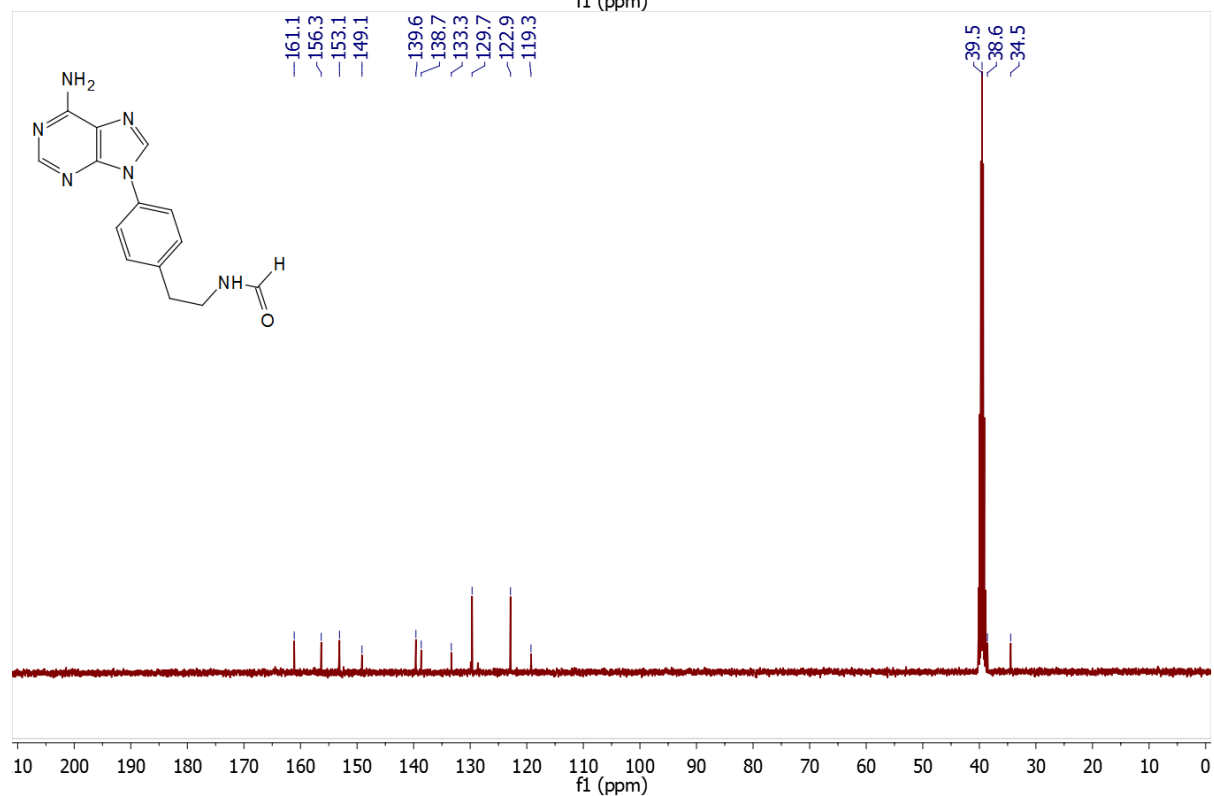

# **8-Methyltheophylline (4d)**

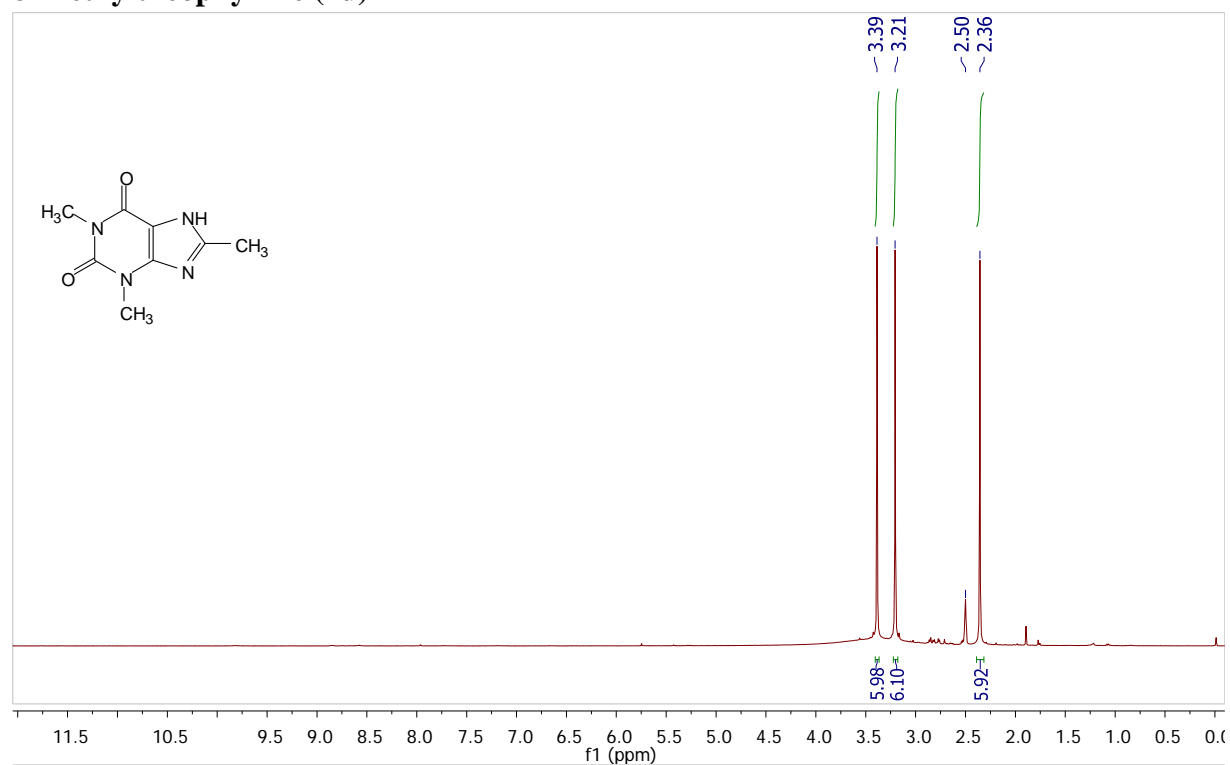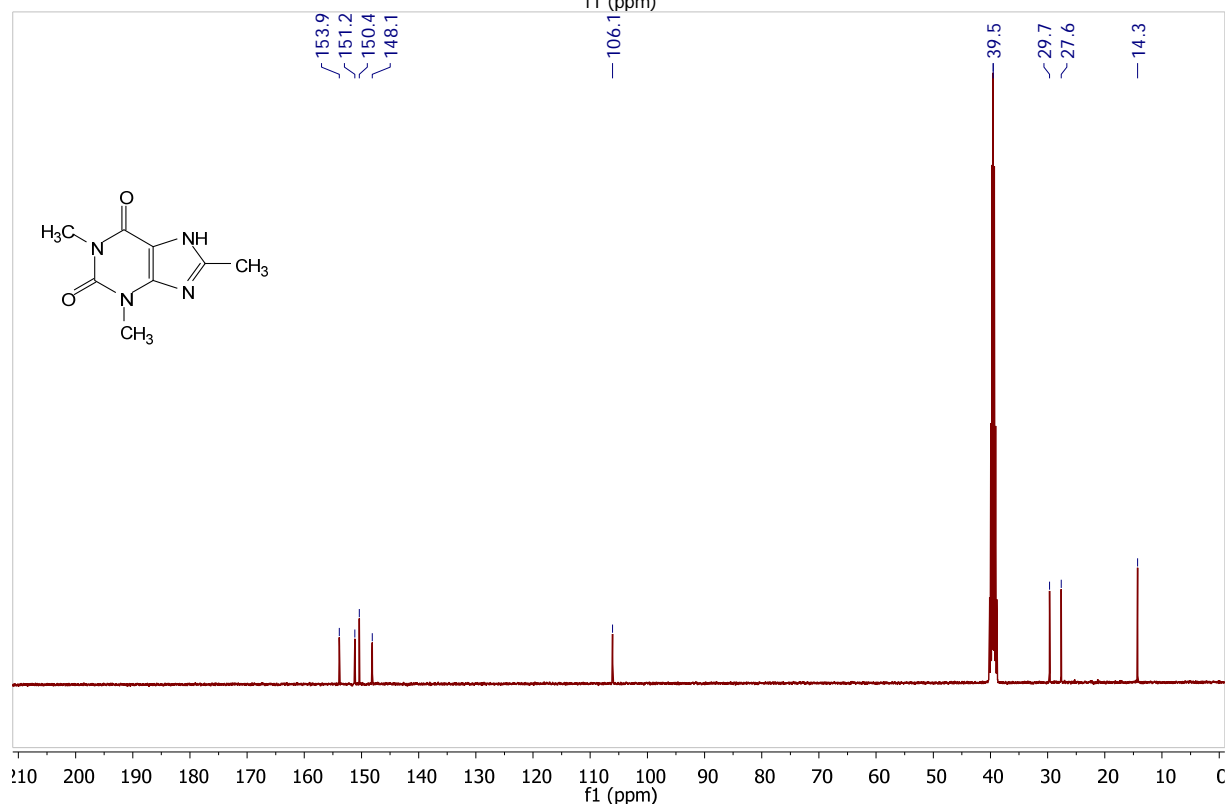

# **9-Phenylpurine (5a)**

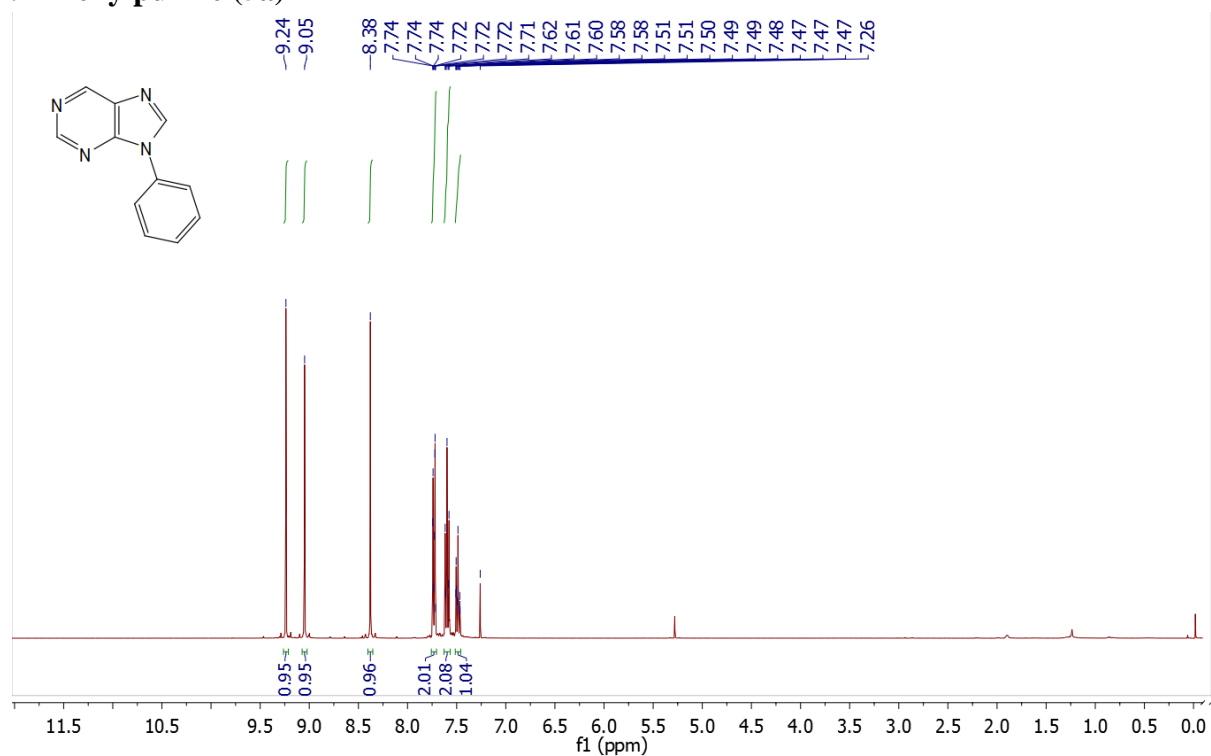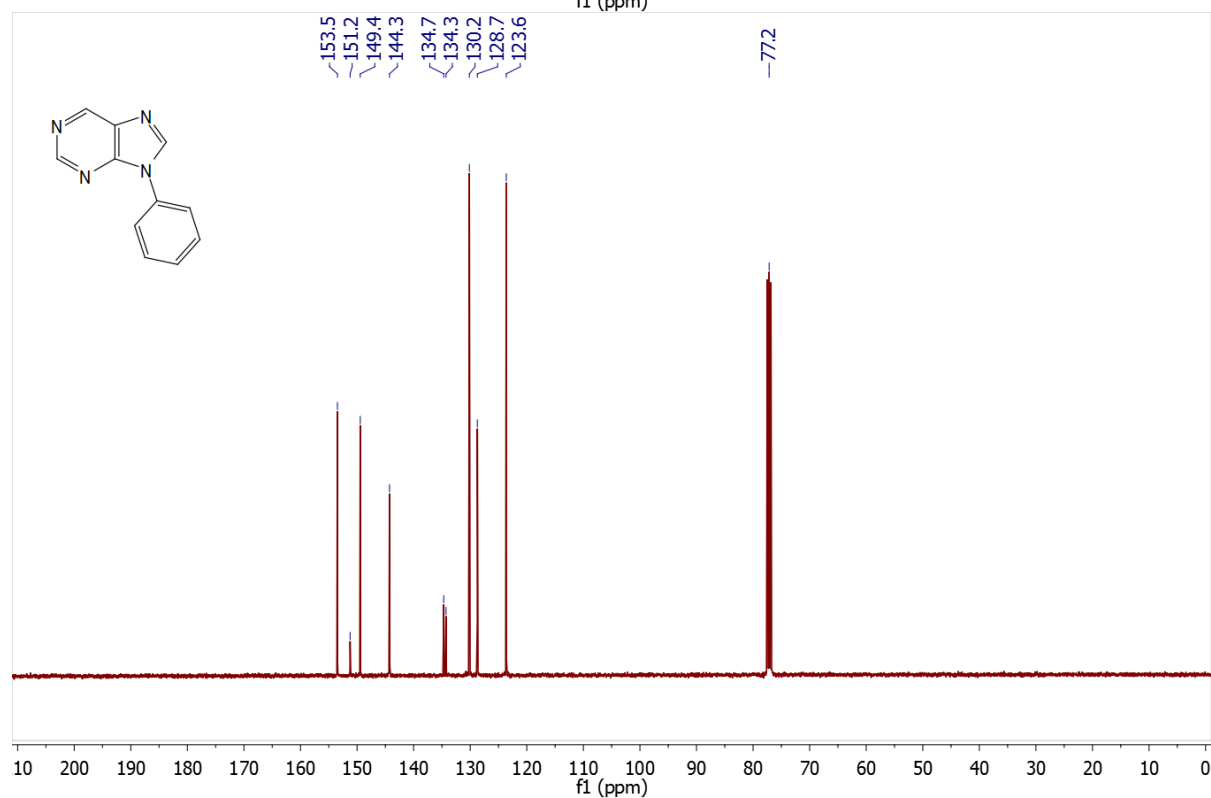

NOESY of **5a**

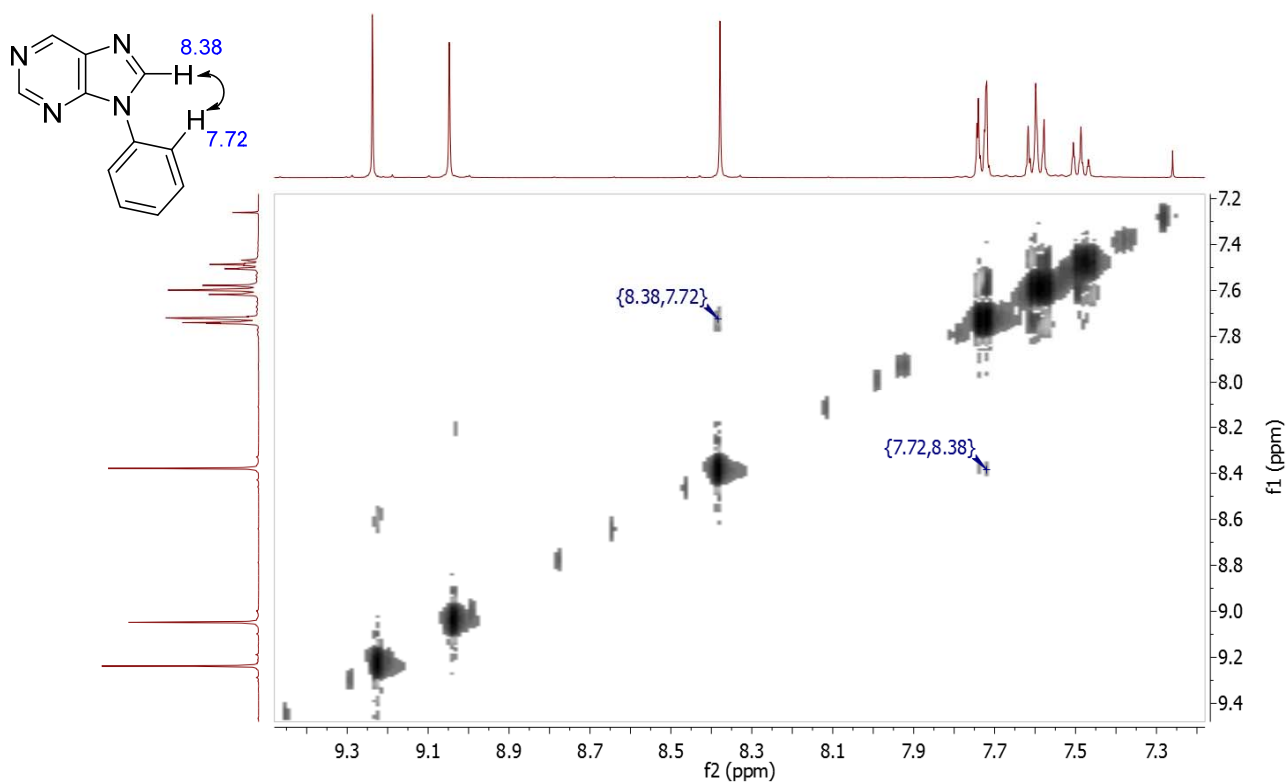

# **9-Phenylpurine-2,6-diamine (5b)**

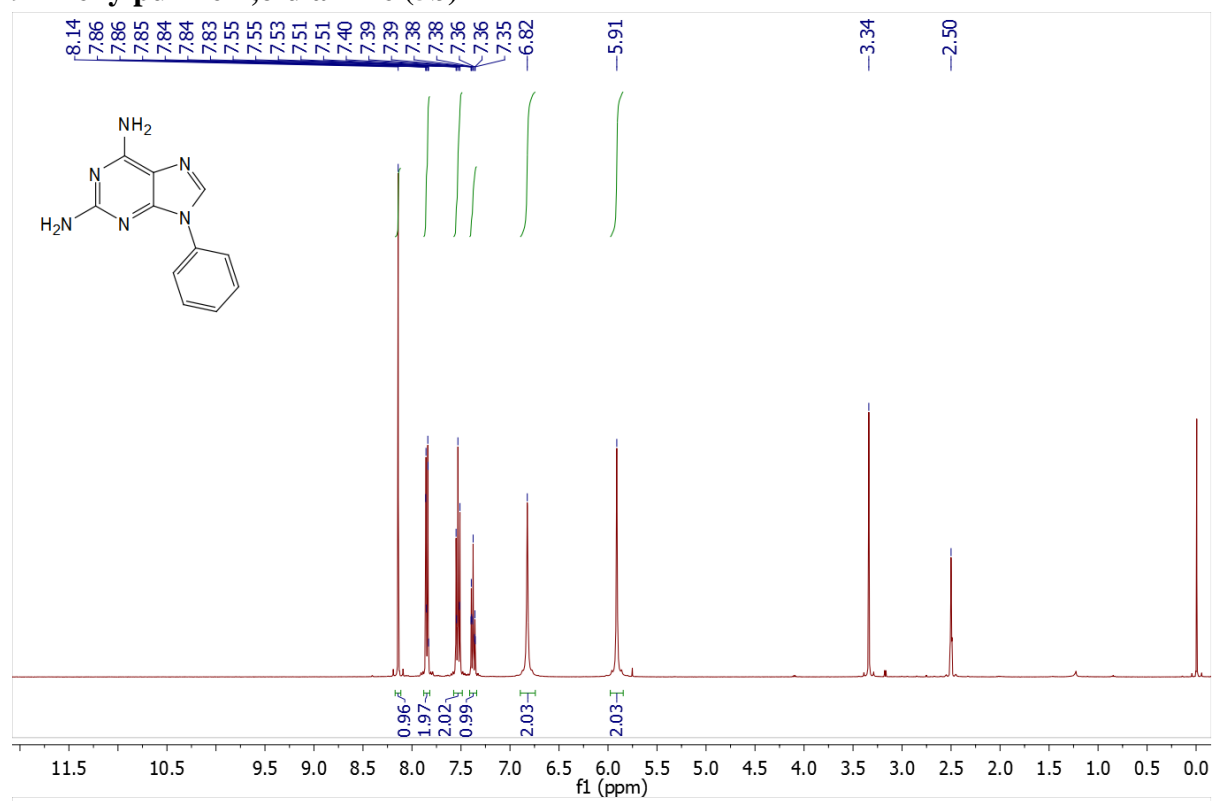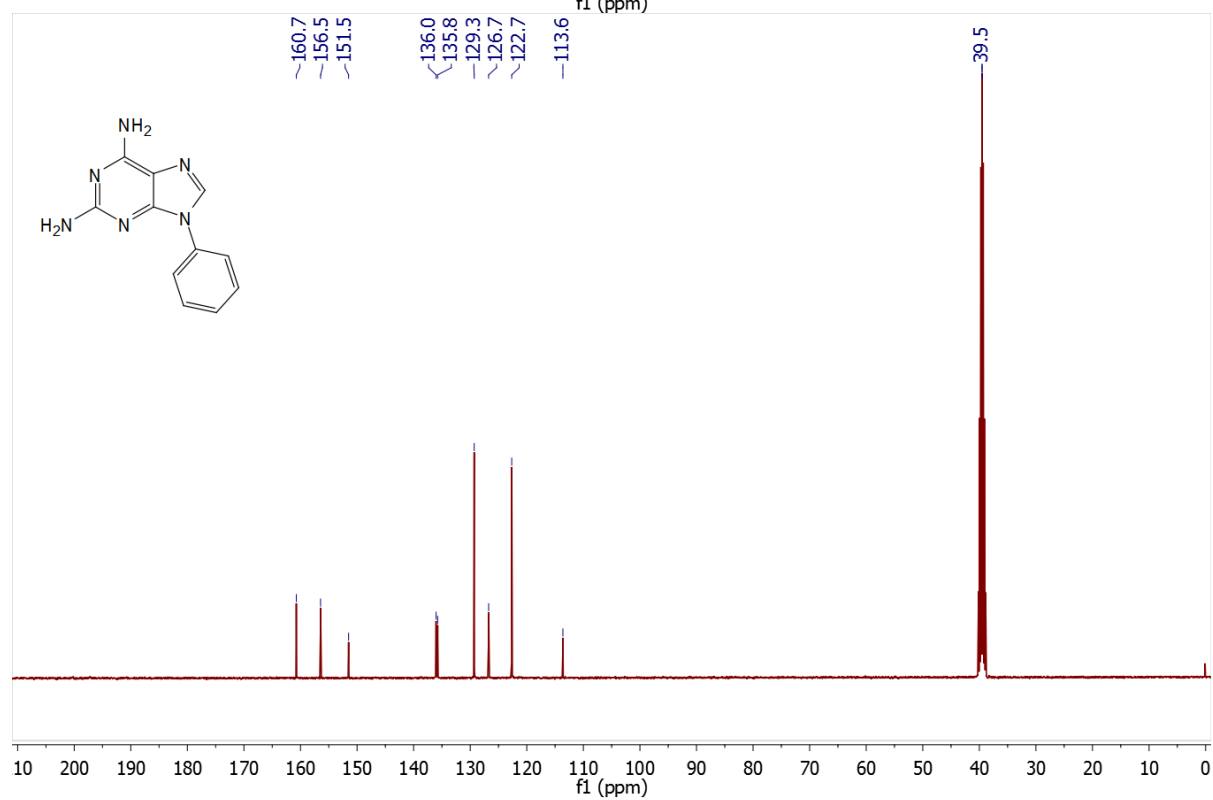

# 9-Phenylguanine (5e)

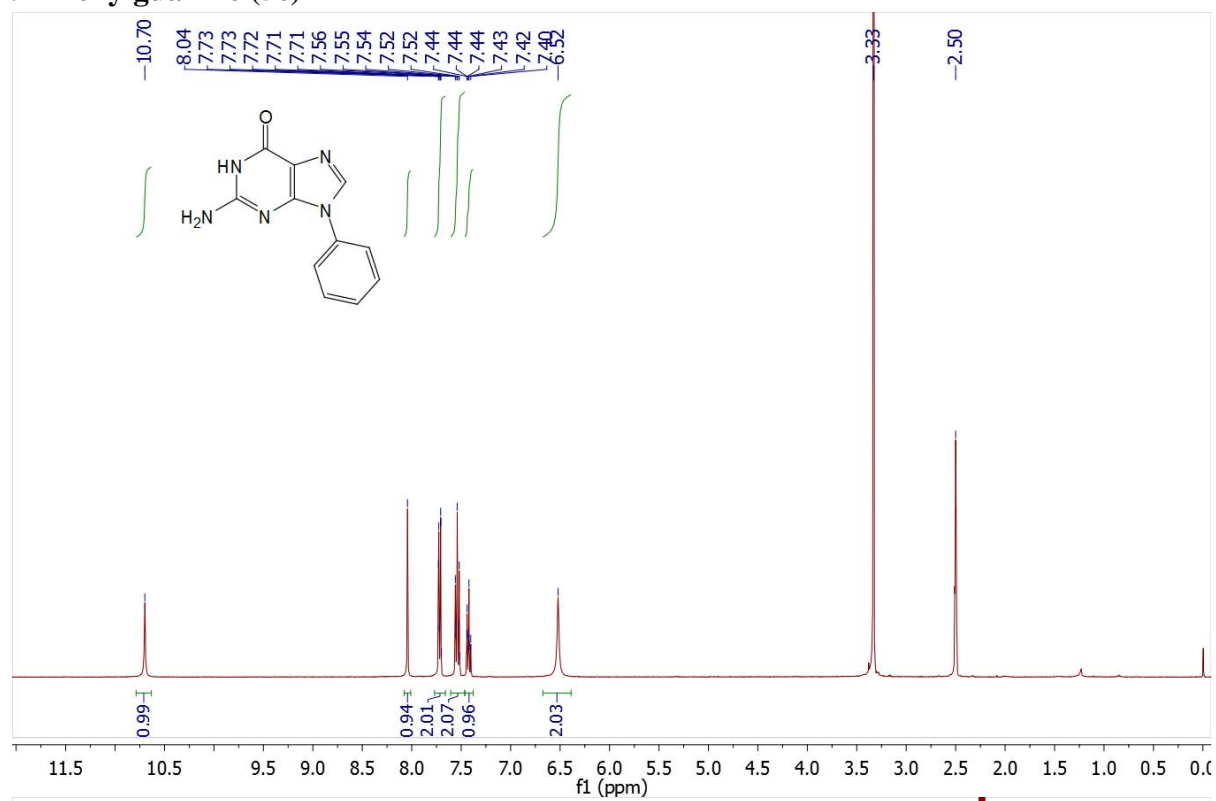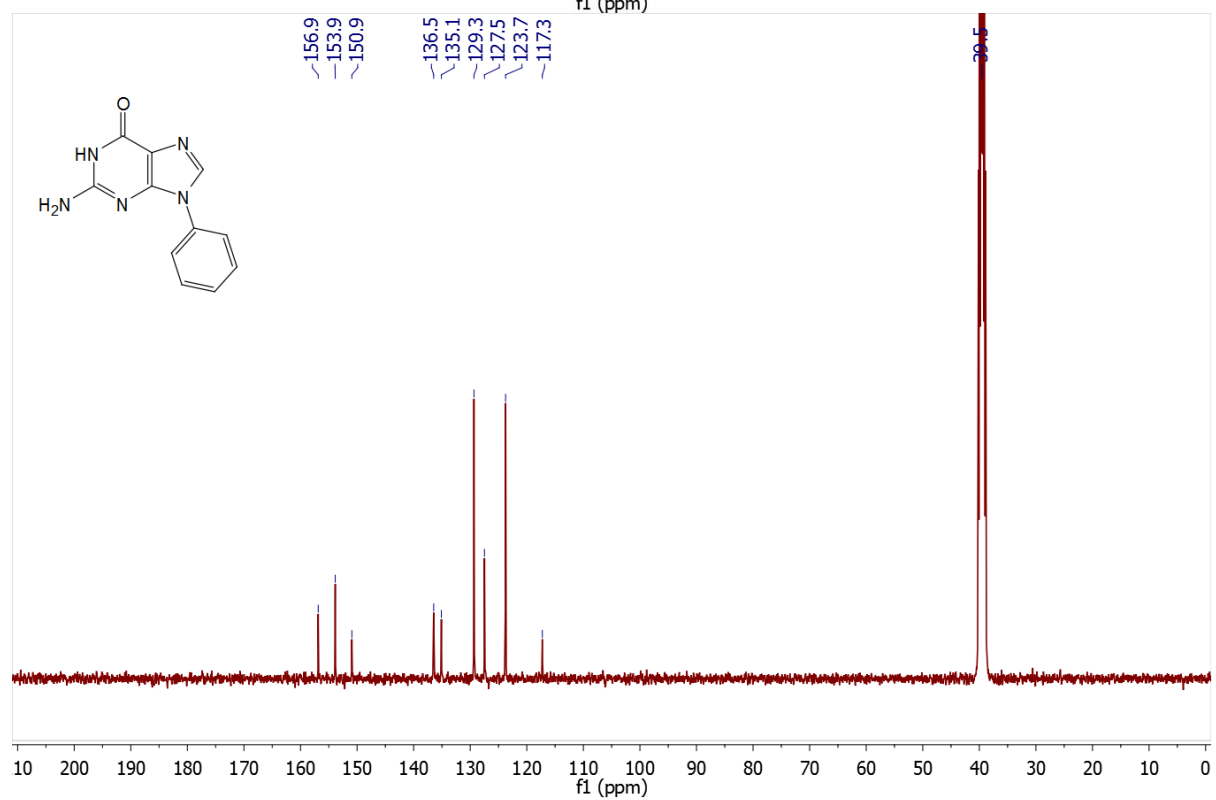



# 9-Phenylhypoxanthine (5f)

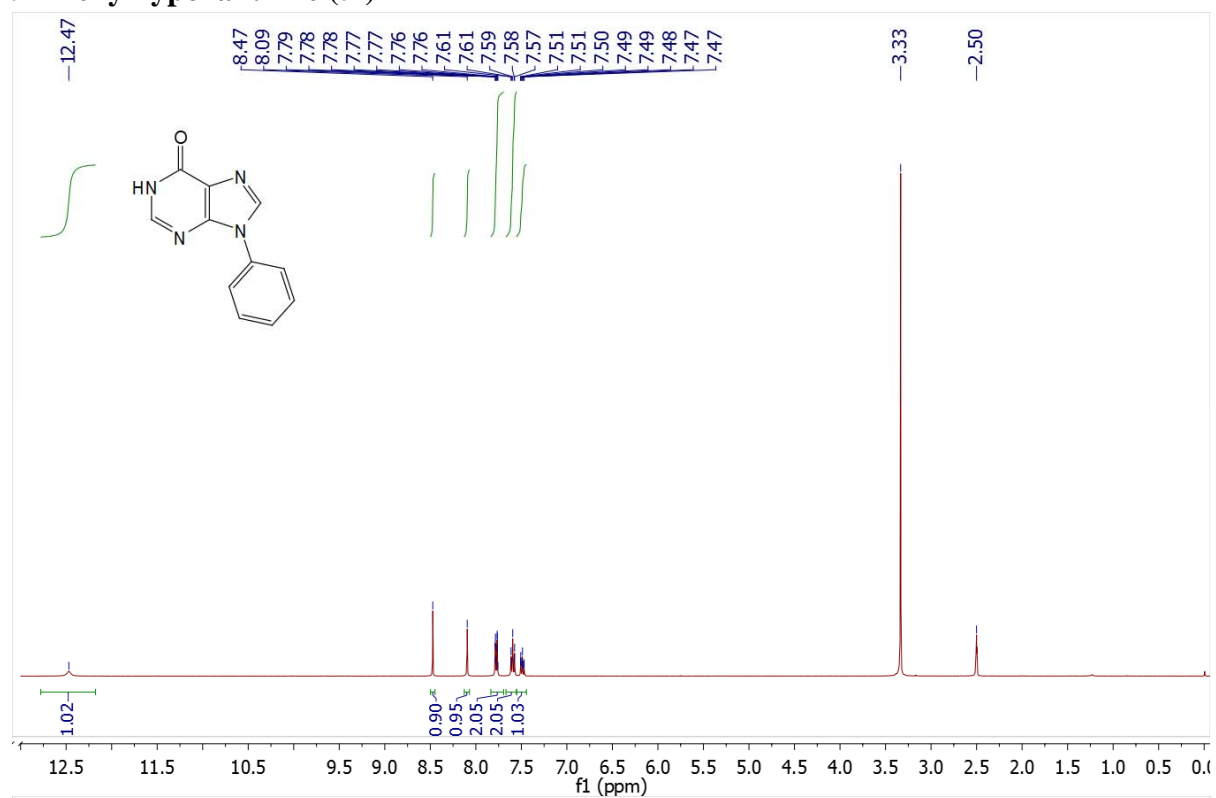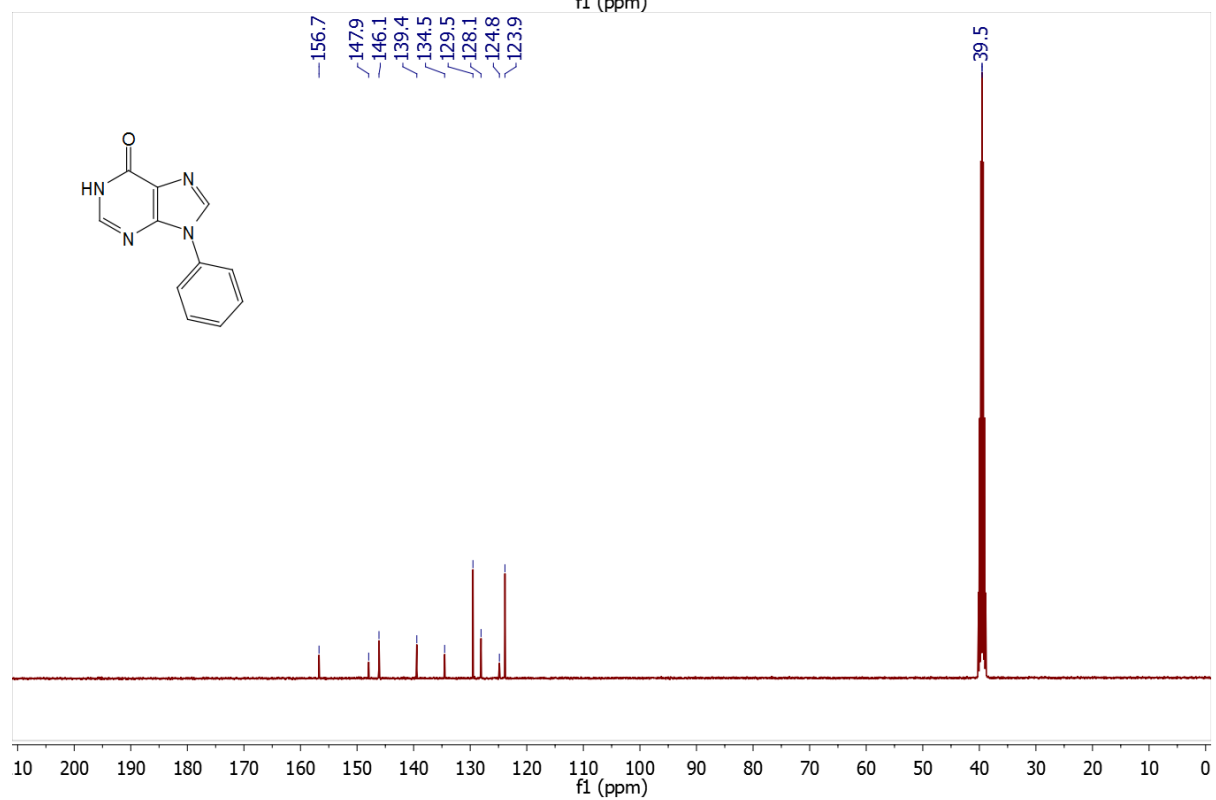

# HMBC of **5f**

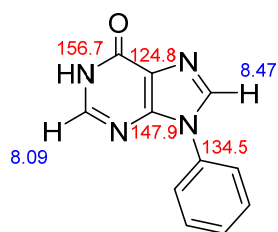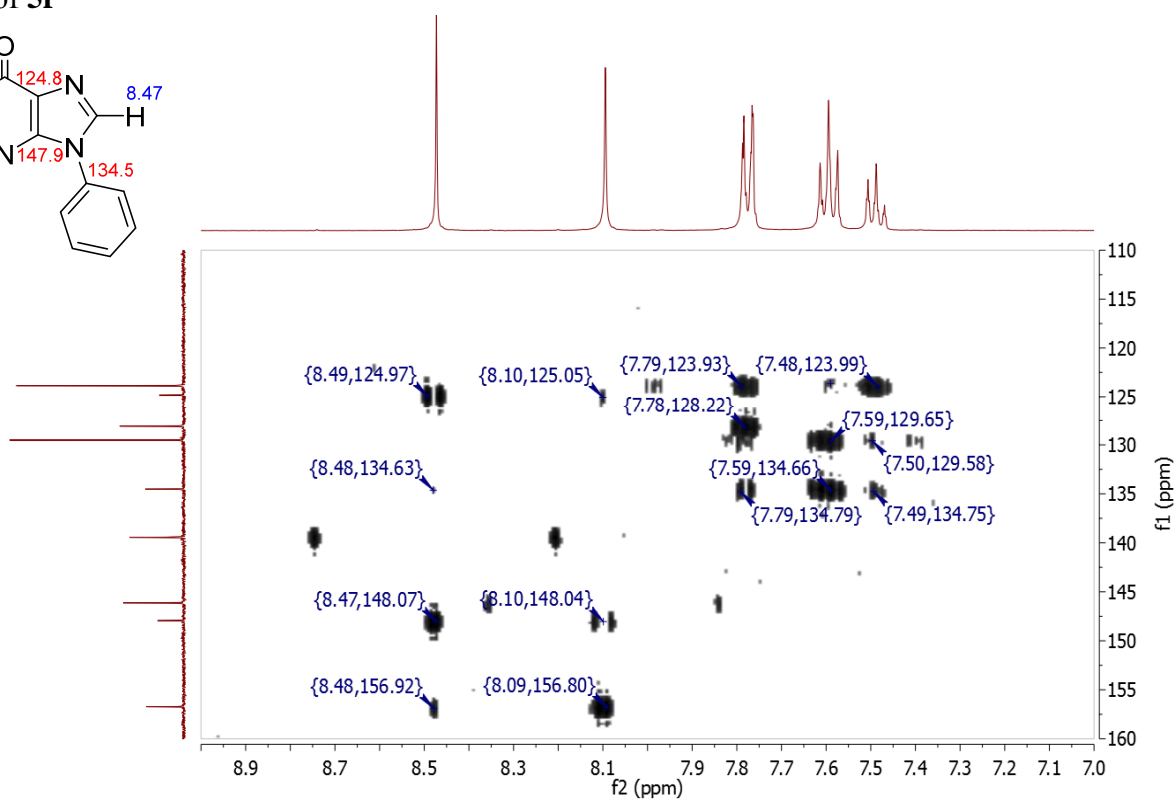

# 7-Phenylpurine (6a)

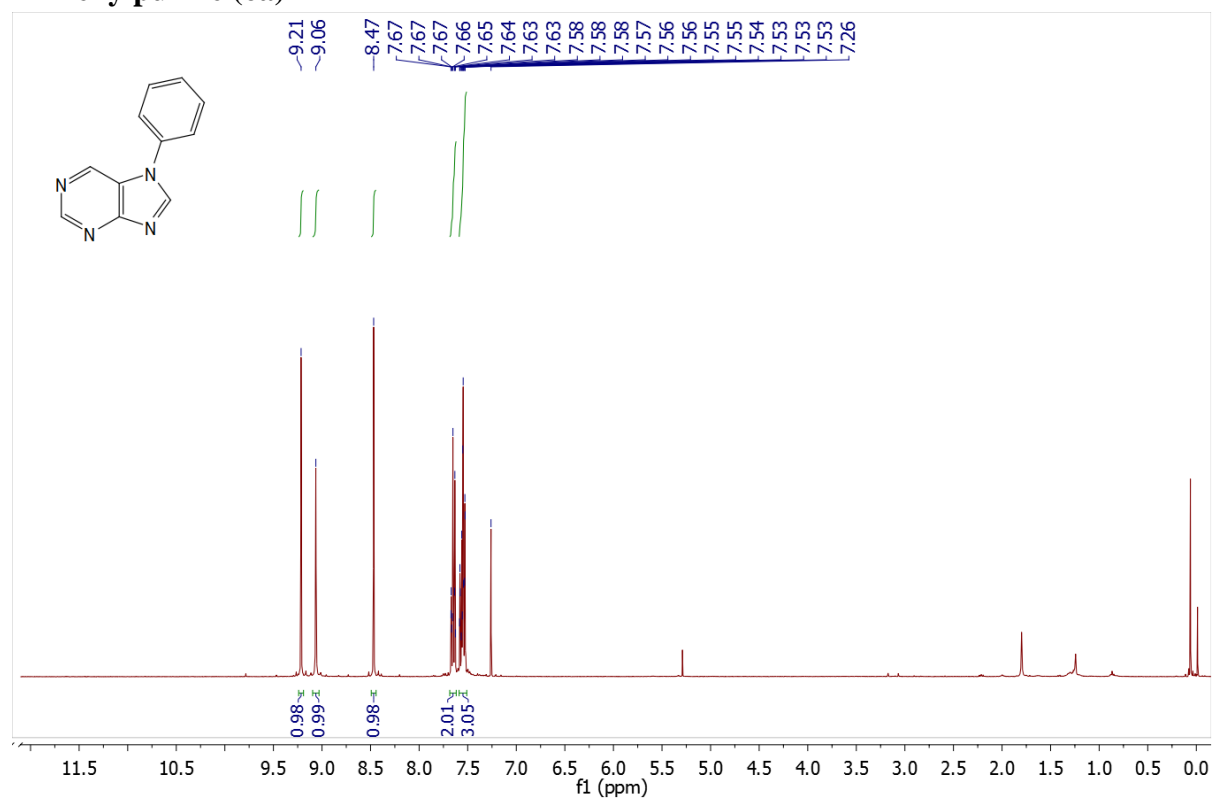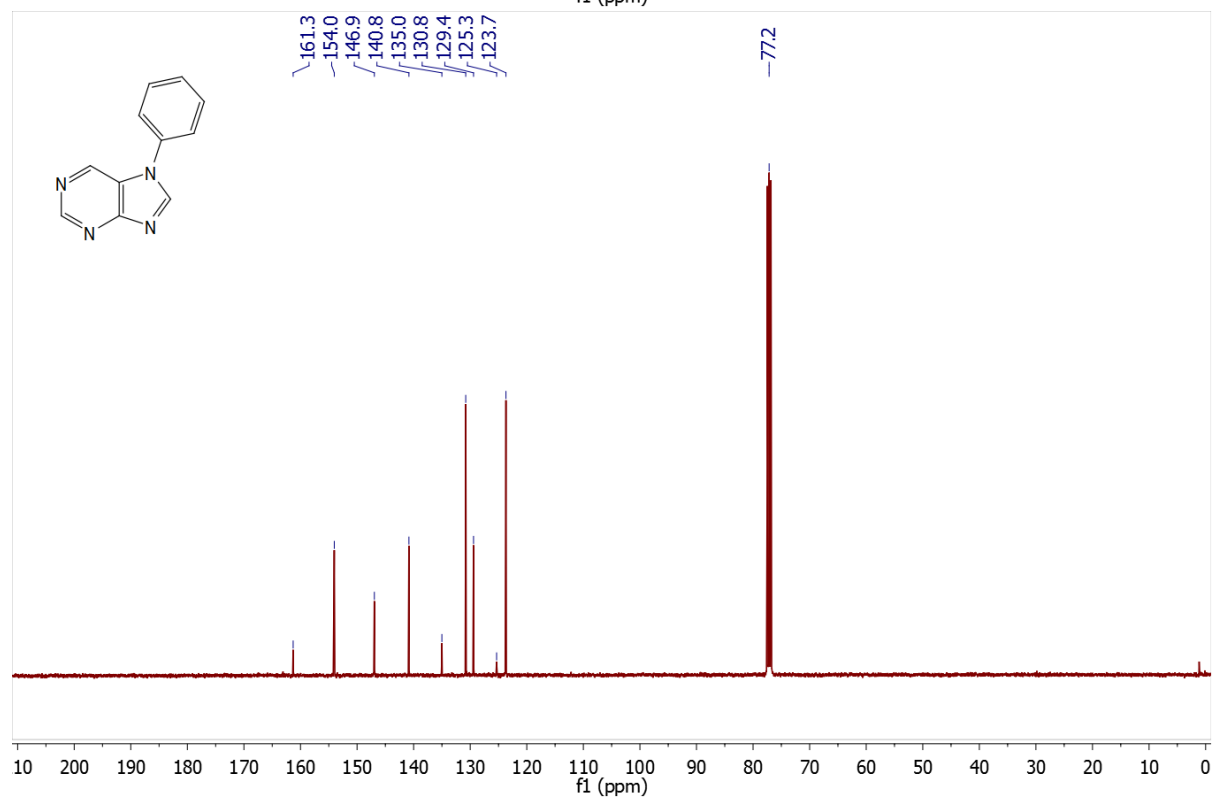

# NOESY of **6a**

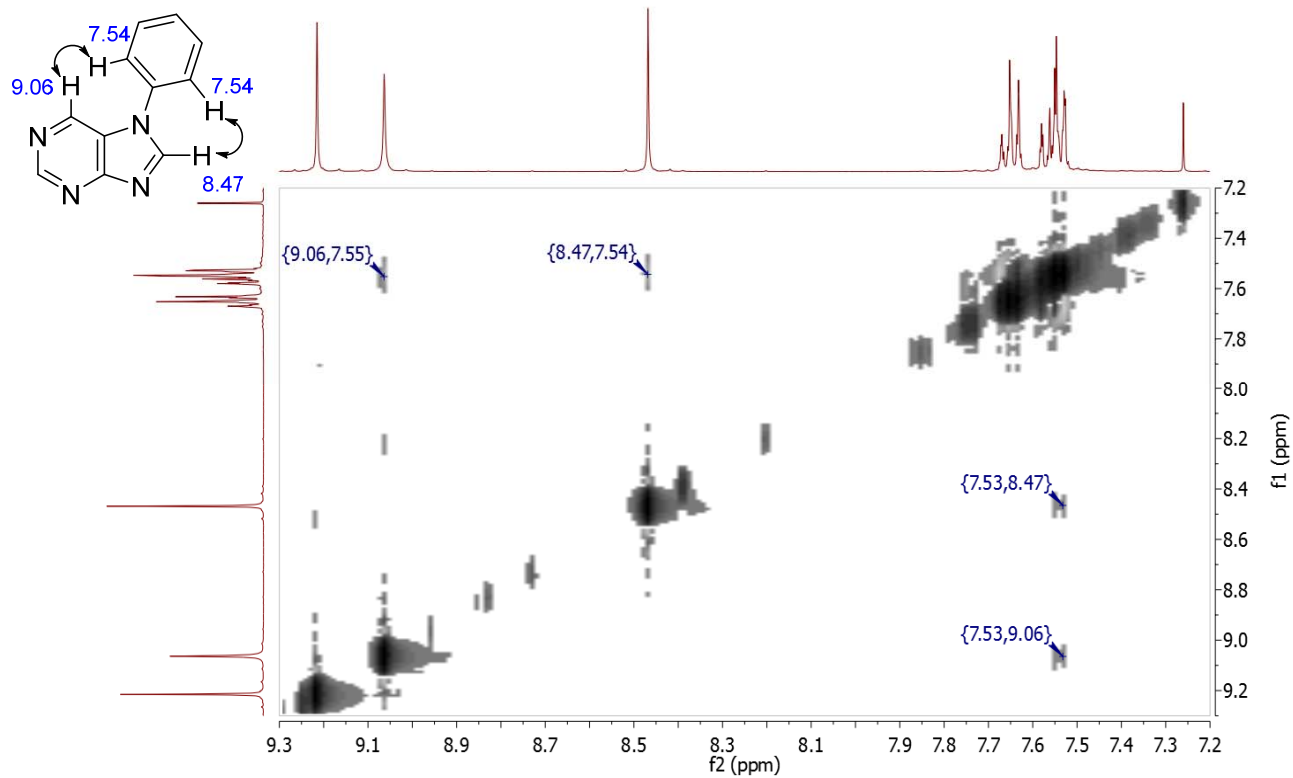

# 7-Phenyltheophylline (6c)

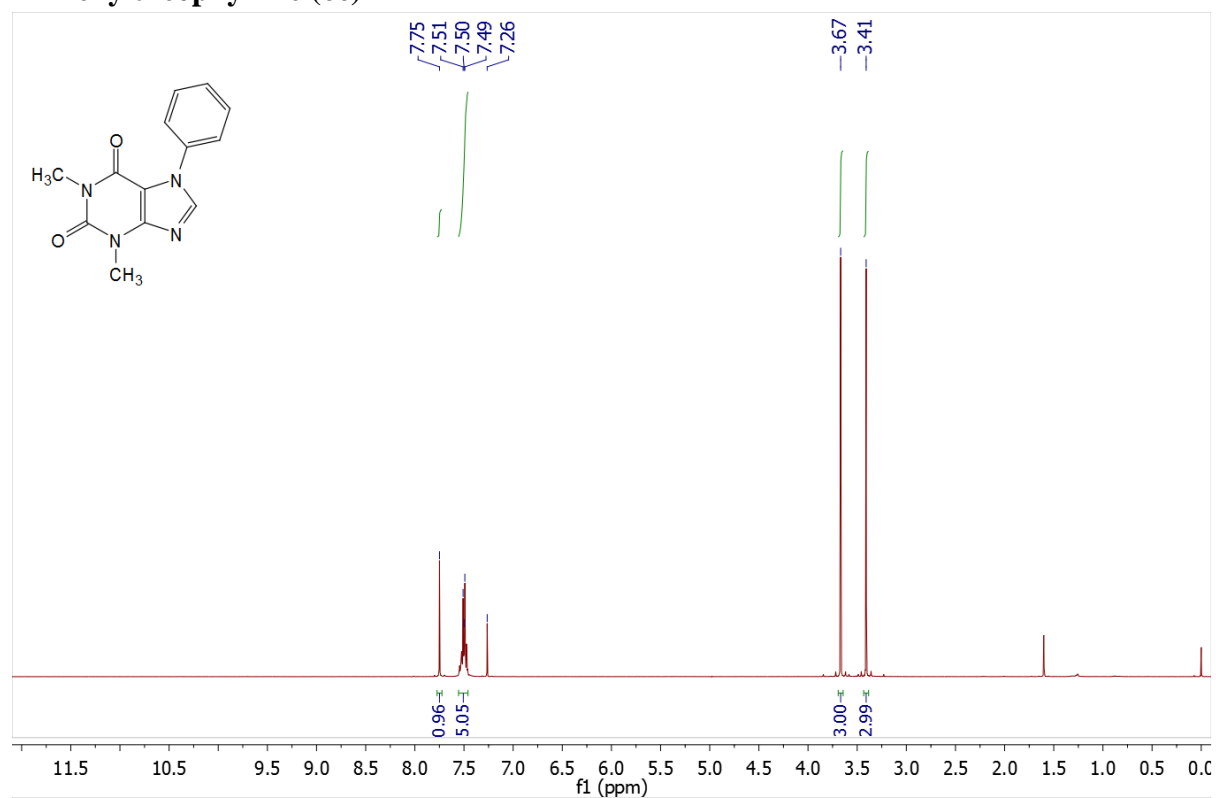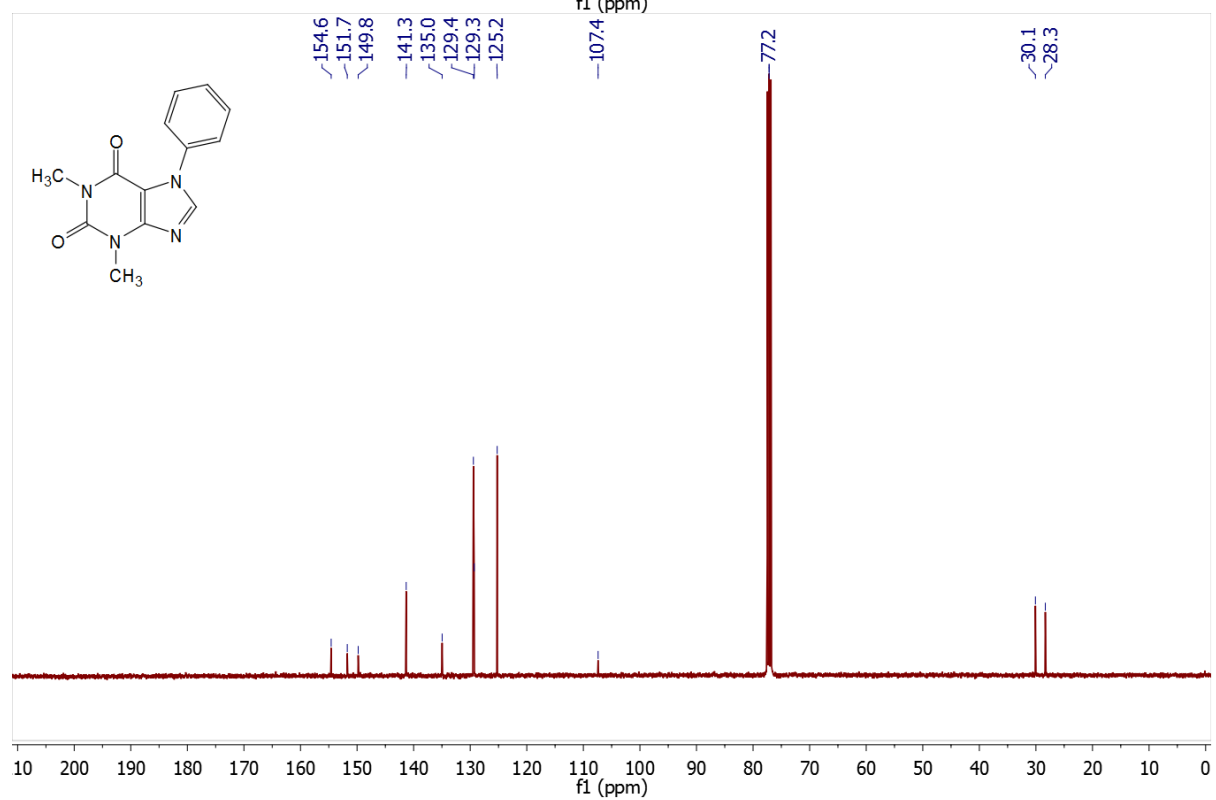

# 8-methyl-7-phenyltheophylline (6d)

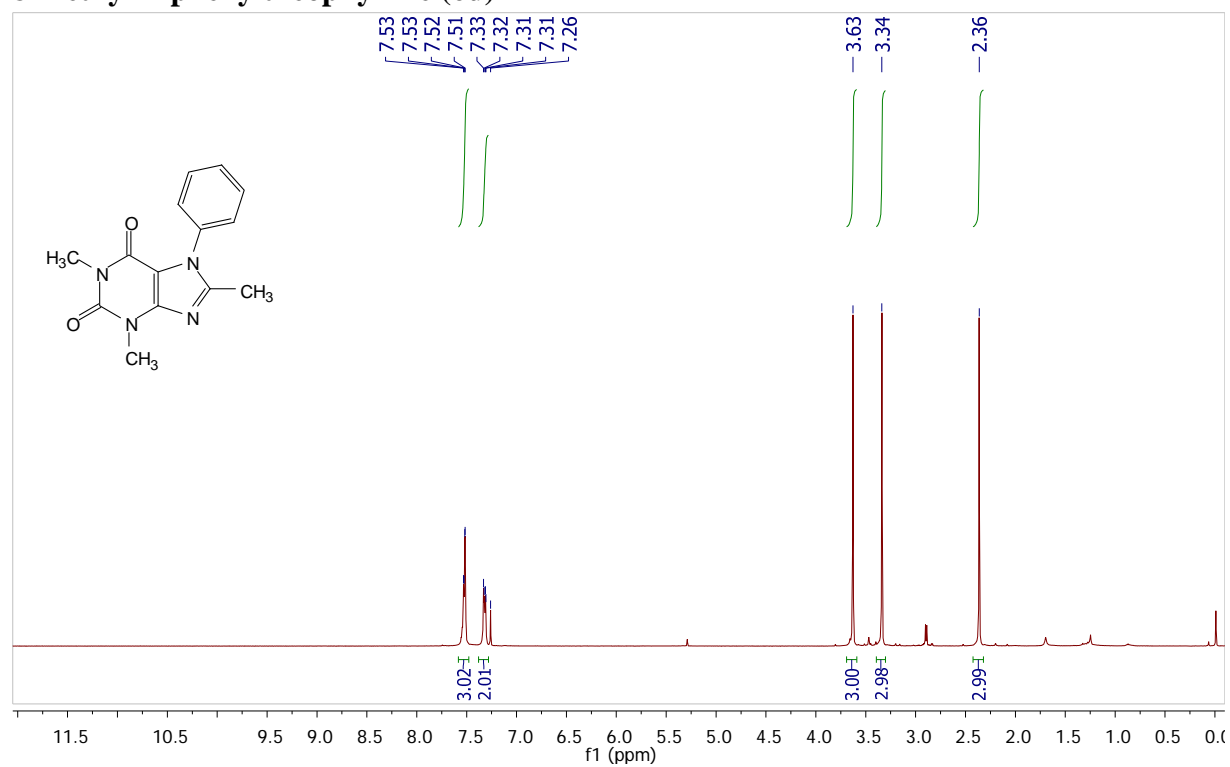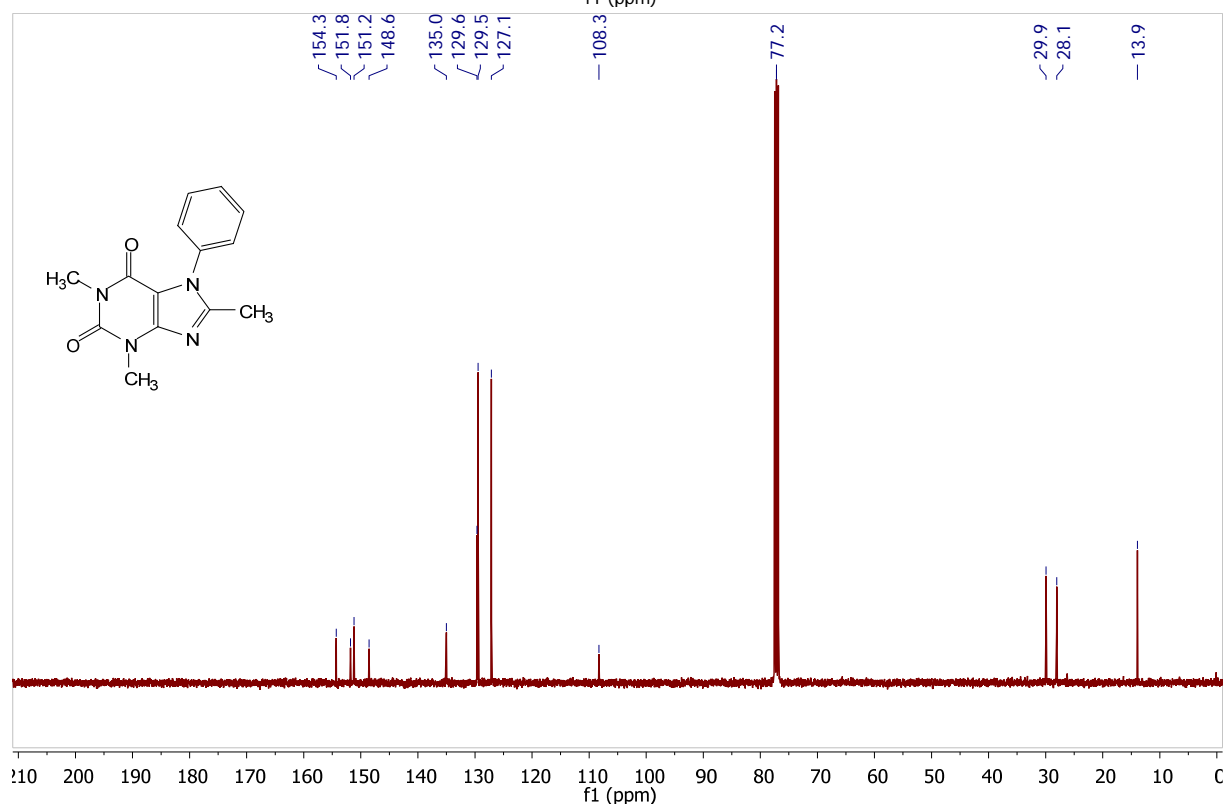

# 7-phenylguanine (6e)

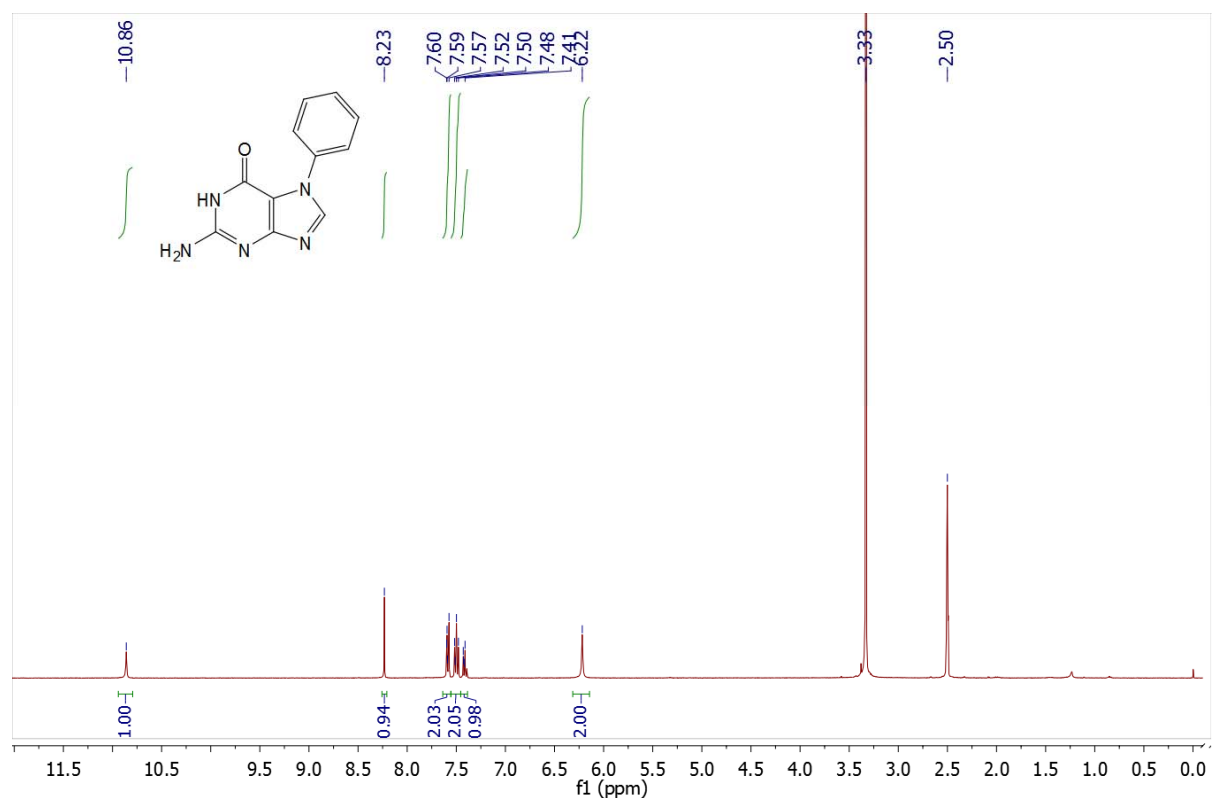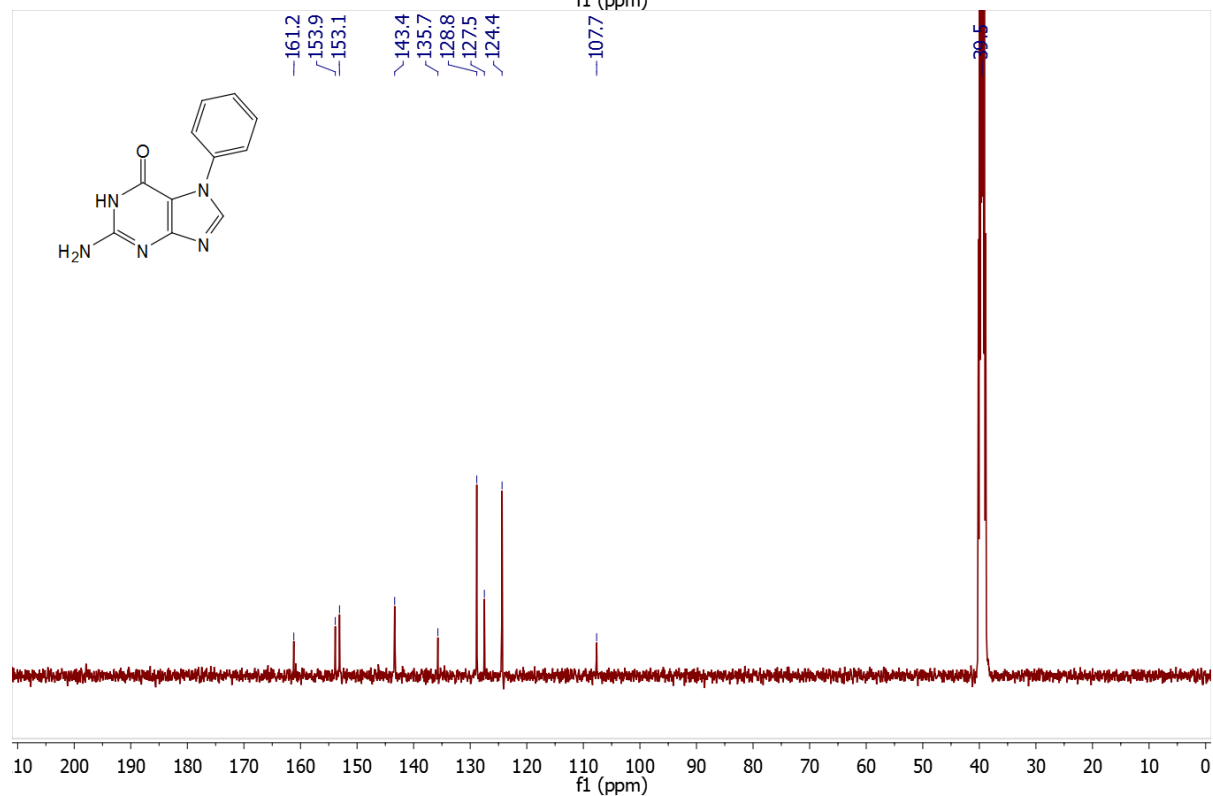

## 7-Phenylhypoxanthine (6f)

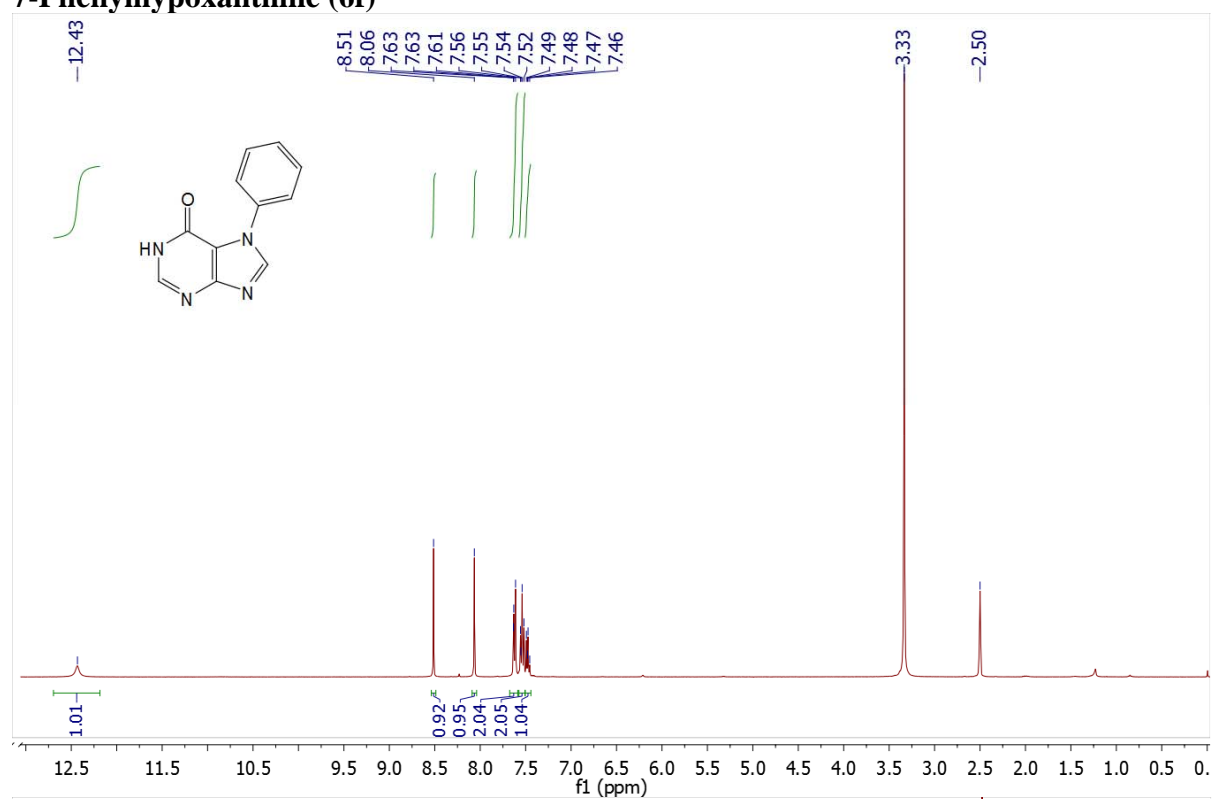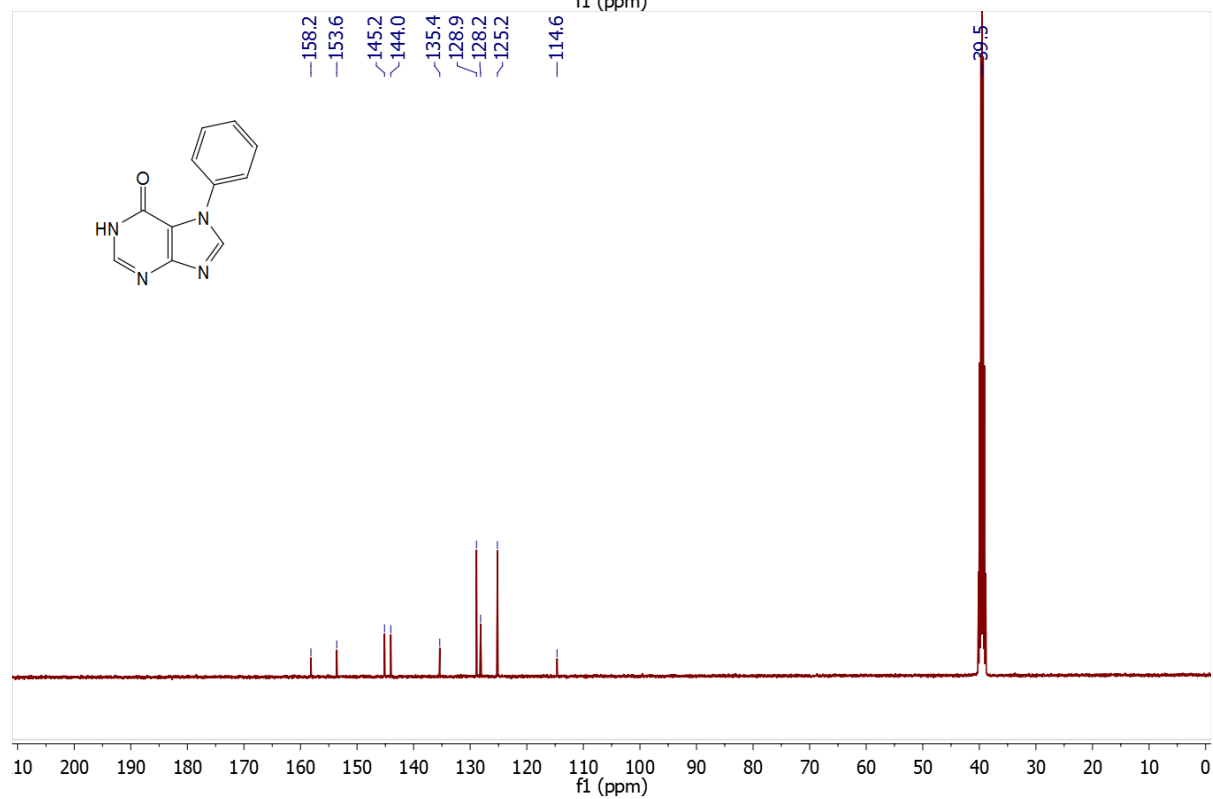



# HMBC of **6f**

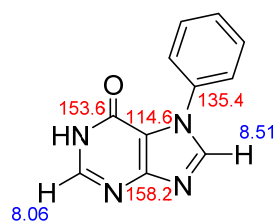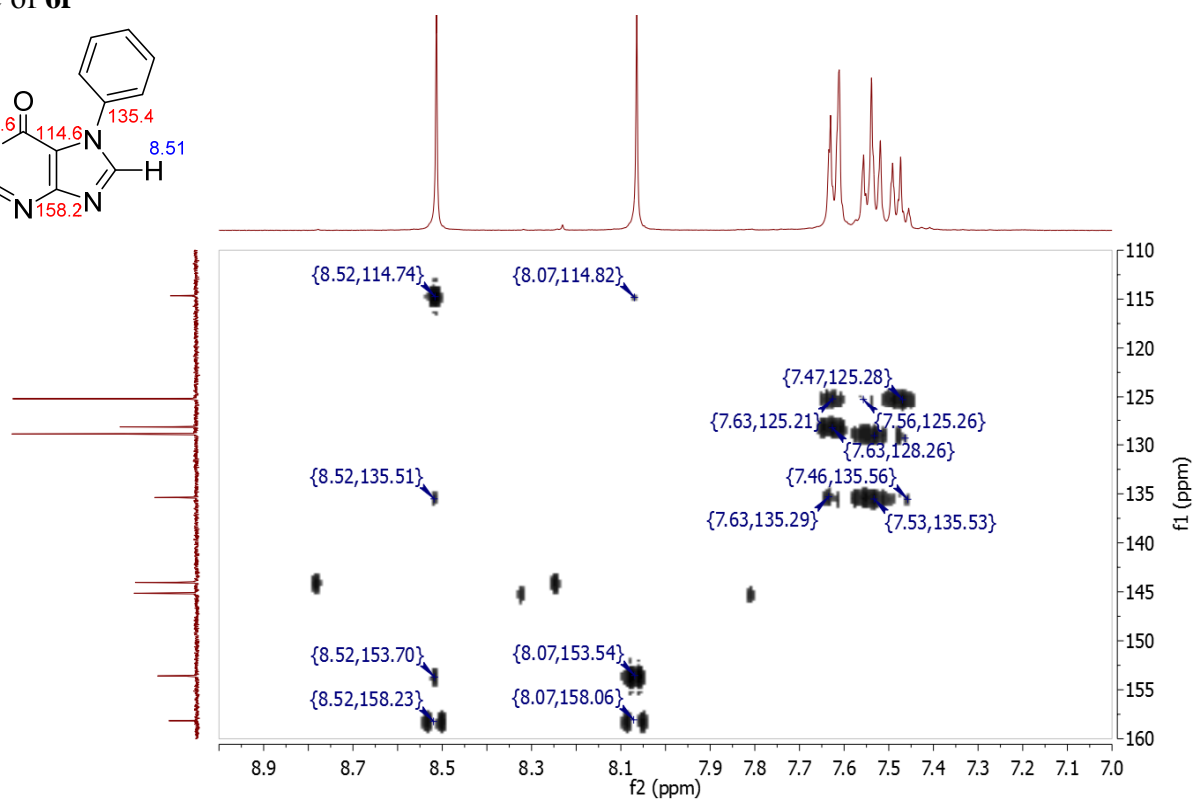

Supplement: c3cc48642g1.pdf [file c3cc48642g1.pdf]
